# Supplementary material for: Ruthenium/HI-catalyzed direct hydromethylation of indoles and quinolines in DME
Source: Royal Society of Chemistry journal article supplement (doi:10.1039/d3nj03341d), 2023-12-07
Supplement: d3nj03341d1.pdf [file d3nj03341d1.pdf]

Electronic Supplementary Material (ESI) for

Supporting Information for

**Ruthenium/II-catalyzed direct hydromethylation of indoles and  
quinolines in DME**

Pengxiang Gao,<sup>a</sup> Zheng Wang,<sup>b</sup> Ruotong Chang,<sup>a</sup> Wei Li,<sup>a</sup> Ziwei Zhao,<sup>a</sup> Dexin Fu,<sup>a</sup> and Qingbin  
Liu,<sup>a\*</sup>

<sup>a</sup> Hebei Key Laboratory of Organic Functional Molecules, College of Chemistry and Materials  
Science, Hebei Normal University, Shijiazhuang 050024, China

<sup>b</sup> College of Science, Hebei Agricultural University, Baoding 071001, China.

\*Corresponding Authors: liuqingbin@hebtu.edu.cn.

**Table of contents**

|   |                                                                         |     |
|---|-------------------------------------------------------------------------|-----|
| 1 | General information                                                     | S2  |
| 2 | Experimental section                                                    | S5  |
| 3 | <sup>1</sup> H NMR, <sup>13</sup> C NMR and MS for the organic products | S6  |
| 4 | References                                                              | S59 |

## 1. General information

All manipulations involving organophosphines and their ruthenium complexes were carried out under a nitrogen atmosphere using standard Schlenk techniques. All solvents were dried and distilled under nitrogen prior to use.  $^1\text{H}$ ,  $^{13}\text{C}$  NMR spectra were recorded on a Bruker AVIII – 500 NMR spectrometer. GC analyses were performed using an Agilent 6820 system (FID) and HP-5 column: with the injector temperature of 300 °C and detector temperature of 300 °C, column temperature 40 °C, withdraw time 2 min, then 20 °C/min to 230 °C keeping for 5 min., then 20 °C/min to 300 °C, withdraw time for 5min., using mesitylene as the internal standard. GC–MS was carried out on DSQII, column: HP-5MS, procedures: Injector Temp:300 °C; Detector Temp:300 °C; column temperature 40 °C, withdraw time 2 min, then 20 °C/min to 230 °C keeping for 5 min, then 20 °C/min to 300 °C withdraw time for 5 min. Indoles and quinolines are purchased from Innochem Science & Technology Co., LTD and used without further purification. Hydrogen gas (99.99%) was purchased from Shijiazhuang Xisanjiao. All solvents were dried and distilled under nitrogen prior to use. Complex **Ru1** was synthesized and characterized according to the procedure reported by ourselves.<sup>1,2</sup>

**Table S1** CAS numbers for substrates

| Substrate      | CAS number | Product                | CAS number   |
|----------------|------------|------------------------|--------------|
| indole         | 120-72-9   | 1-methylindoline       | 824-21-5     |
|                |            | indoleline             | 496-15-1     |
|                |            | 1-methylindole         | 603-76-9     |
| 6-methylindole | 3420-02-8  | 1,6-dimethylindoline   | 1384080-58-3 |
|                |            | 1,6-dimethyl-1H-indole | 5621-15-8    |
| 5-methylindole | 614-96-0   | 1,5-dimethylindoline   | 1503436-23-4 |
|                |            | 1,5-dimethyl-1H-indole | 27816-53-1   |
| 4-methylindole | 16096-32-5 | 1,4-dimethylindoline   | 1856504-77-2 |
|                |            | 1,4-dimethylindole     | 27816-52-0   |

|                   |            |                                          |              |
|-------------------|------------|------------------------------------------|--------------|
| 6-methoxyindole   | 3189-13-7  | 6-methoxy-1-methyl-indoline              | 7556-48-1    |
|                   |            | 6-methoxy-1-methyl-1H-indole             | 1968-17-8    |
| 5-methoxyindole   | 1006-94-6  | 5-methoxy-1-methyl-indoline              | 74492-43-6   |
|                   |            | 5-methoxy-N-methylindole                 | 2521-13-3    |
| 4-methoxyindole   | 4837-90-5  | 4-methoxy-1-methyl-indoline              | 7569-83-7    |
|                   |            | 4-methoxy-1-methyl-1H-indole             | 7556-35-6    |
|                   |            | 4-methoxy-1H-indole                      | 4837-90-5    |
| 6-fluoroindole    | 399-51-9   | 6-fluoro-1-methylindoline                | 1849248-48-1 |
|                   |            | 6-fluoro-1-methyl-1H-indole              | 441715-92-0  |
|                   |            | 6-fluoro-1H-indole                       | 399-51-9     |
| 5-fluoroindole    | 399-52-0   | 5-fluoro-1-methylindoline                | 388078-34-0  |
|                   |            | 1,5-dimethyl-1H-indole                   | 27816-53-1   |
| 4-fluoroindole    | 387-42-9   | 4-fluoro-1-methylindoline                | 1851835-07-8 |
|                   |            | 4-fluoro-1-methyl-1H-indole              | 441715-34-0  |
| 6-chloroindole    | 17422-33-2 | 6-chloro-1-methylindoline                | 99846-63-6   |
|                   |            | 6-chloro-1-methyl-1H-indole              | 155868-51-2  |
| 4-chloroindole    | 25235-85-2 | 4-chloro-1-methylindoline                | 99848-88-1   |
|                   |            | 4-chloro-1-methyl-1H-indole              | 77801-91-3   |
| quinoline         | 91-22-5    | N-methyl-1,2,3,4-tetrahydroquinoline     | 491-34-9     |
| 8-methylquinoline | 611-32-5   | 1,8-dimethyl-1,2,3,4-tetrahydroquinoline | 84573-84-2   |
|                   |            | 8-methyl-1,2,3,4-tetrahydroquinoline     | 52601-70-4   |
| 7-methylquinoline | 612-60-2   | 1,7-dimethyl-1,2,3,4-tetrahydroquinoline | 91245-78-2   |
| 6-methylquinoline | 91-62-3    | 1,6-dimethyl-1,2,3,4-tetrahydroquinoline | 104524-39-2  |

|                    |           |                                                                                             |                            |
|--------------------|-----------|---------------------------------------------------------------------------------------------|----------------------------|
| 5-methylquinoline  | 7661-55-4 | 1,5-dimethyl-1,2,3,4-tetrahydroquinoline<br>5-methyl-1,2,3,4-tetrahydroquinoline            | 1864825-92-2<br>58960-02-4 |
| 6-methoxyquinoline | 5263-87-6 | 1-methyl-6-methoxy-1,2,3,4-<br>tetrahydroquinoline<br>6-methoxy-1,2,3,4-tetrahydroquinoline | 74492-61-8<br>120-15-0     |
| 5-methoxyquinoline | 6931-19-7 | 1-methyl-5-methoxy-1,2,3,4-<br>tetrahydroquinoline                                          | 1880957-62-9               |
| 8-fluoroquinoline  | 394-68-3  | 8-fluoro-1-methyl-1,2,3,4-<br>tetrahydroquinolin<br>8-fluoro-1,2,3,4-tetrahydroquinoline    | 1862849-43-1<br>75414-02-7 |
| 6-fluoroquinoline  | 396-30-5  | 6-fluoro-1-methyl-1,2,3,4-<br>tetrahydroquinolin                                            | 388078-35-1                |

---

## 2. Experimental section

### 2.1 General procedure of hydromethylation

Under an atmosphere of nitrogen, a stainless steel 100 mL autoclave, equipped with a magnetic stir bar, was charged with **Ru1** (0.001 ~ 0.005 mmol) and the solvents to be used (2.5 ~ 10 mL). A solution of the substrates (0.5 mmol) in the solvent was added *via* a syringe. The autoclave was purged by three cycles of pressurization, venting with N<sub>2</sub> (1 ~ 5 bar), and then pressurized with the desired pressure (40 ~ 80 bar). The autoclave was heated to the desired temperature (80 ~ 140 °C) and the contents stirred. After the pre-determined reaction time, the autoclave was cooled to room temperature and the pressure slowly released. The reaction mixture was filtered through a plug of silica gel and then analyzed by GC and GC-MS. The mixture was concentrated under reduced pressure, and the residue was purified by column chromatography on silica gel (petroleum ether/EtOAc, 80:1-20:1) to afford the hydromethylation products and detected by NMR.

### 2.2 Optimizing reaction conditions

**Table S2** The dosage of hydroiodic acid for hydromethylation of indole (**a1**) to 1-methylindoline (**b1**)<sup>a</sup>

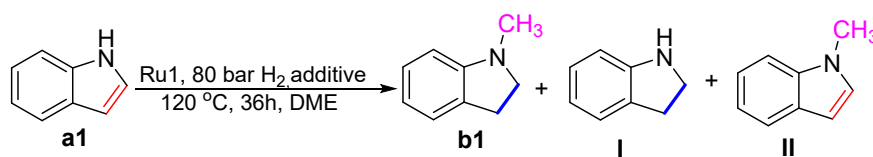

| Entry | HI (X mmol) | Conv. (%) | Yield of <b>b1</b> (%) | Yield of <b>I</b> (%) | Yield of <b>II</b> (%) |
|-------|-------------|-----------|------------------------|-----------------------|------------------------|
| 1     | 0.50        | 96.9      | 81.4                   | 0                     | 15.5                   |
| 2     | 0.75        | 65.8      | 56.6                   | 0                     | 9.2                    |
| 3     | 0.25        | 96.8      | 78.0                   | 0                     | 18.8                   |
| 4     | 0.20        | 97.0      | 76.1                   | 0                     | 20.9                   |
| 5     | 0.15        | 83.5      | 71.5                   | 0                     | 12.0                   |
| 6     | 0.10        | 79.2      | 68.0                   | 0                     | 11.2                   |
| 7     | 0.05        | 65.9      | 55.1                   | 5.0                   | 5.8                    |

Conditions: Indole (0.5 mmol), **Ru1** (10 mol%), DME (10 mL), P (H<sub>2</sub>) = 80 bar, Temp. = 120 °C, Time = 36 h. All yields are determined by GC using mesitylene as the internal standard.

**Table S3** Temperature screening<sup>a</sup>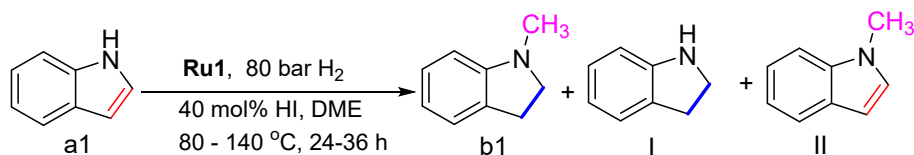

| Entry | Tem. (°C) | Conv. (%) | Yield of <b>b1</b> (%) | Yield of <b>I</b> (%) | Yield of <b>II</b> (%) |
|-------|-----------|-----------|------------------------|-----------------------|------------------------|
| 1     | 80        | 39.3      | 36.4                   | 0                     | 2.9                    |
| 2     | 100       | 58.7      | 54.3                   | 0                     | 4.4                    |
| 3     | 120       | 97.0      | 76.1                   | 0                     | 20.9                   |
| 4     | 140       | 96.4      | 73.6                   | 3.0                   | 19.8                   |

Conditions: Indole (0.5 mmol), **Ru1** (1 mol%), DME (10 mL), P (H<sub>2</sub>) = 80 bar, Temp. = 120 °C, Time = 36 h. All yields are determined by GC using mesitylene as the internal standard.

### 3. <sup>1</sup>H NMR, <sup>13</sup>C NMR and MS for the organic products

**Table S4** <sup>1</sup>H NMR, <sup>13</sup>C NMR and MS for the organic products

| Entry | Substrate | NMR and MS                                                                                                                                                                                                                                                                                                                                 | Reference |
|-------|-----------|--------------------------------------------------------------------------------------------------------------------------------------------------------------------------------------------------------------------------------------------------------------------------------------------------------------------------------------------|-----------|
| 1     |           | <sup>1</sup> H NMR (500 MHz, DMSO- <i>d</i> <sub>6</sub> ) δ 7.06 – 6.97 (m, 2H), 6.59 (t, 1H), 6.49 (d, 1H), 3.22 (t, 2H), 2.85 (t, 2H), 2.68 (s, 3H).<br><sup>13</sup> C NMR (125 MHz, DMSO- <i>d</i> <sub>6</sub> ) δ 153.8, 130.2, 127.5, 124.4, 117.7, 107.4, 56.0, 36.3, 28.6.<br>MS: <i>m/z</i> [M] <sup>+</sup> , 133.06           | 3         |
| 2     |           | <sup>1</sup> H NMR (400 MHz, CDCl <sub>3</sub> ) δ 7.79 – 7.68 (m, 1H), 7.42 (d, 1H), 7.39 – 7.28 (m, 1H), 7.26 – 7.16 (m, 1H), 7.13 (d, 1H), 6.59 (d, 1H), 3.86 (d, 3H).<br><sup>13</sup> C NMR (101 MHz, CDCl <sub>3</sub> ) δ 136.8, 128.9, 128.6, 121.6, 121.0, 119.4, 109.3, 101.0, 32.9.<br>MS: <i>m/z</i> [M] <sup>+</sup> , 131.04 | 4         |
| 3     |           | <sup>1</sup> H NMR (400 MHz, CDCl <sub>3</sub> ): δ 7.19 (d, 1H), 7.08 (t, 1H), 6.82 - 6.67 (m, 2H), 3.61 (t, 2H), 3.09 (t, 2H).<br><sup>13</sup> C NMR (101 MHz, CDCl <sub>3</sub> ): δ 151.5, 129.5, 127.3, 124.7, 118.9, 109.7, 47.4, 29.9.<br>MS: <i>m/z</i> [M] <sup>+</sup> , 119.03                                                 | 3         |
| 4     |           | <sup>1</sup> H NMR (400 MHz, CDCl <sub>3</sub> ) δ 7.01 (d, 1H), 6.54 (d, 1H), 6.37 (s, 1H), 3.32 (t, 2H), 2.93 (t, 2H), 2.78 (s, 3H), 2.34 (s, 3H).<br>MS: <i>m/z</i> [M] <sup>+</sup> , 147.13                                                                                                                                           | 3         |

|    |                                                                                     |                                                                                                                                                                                                                                                                                                                           |   |
|----|-------------------------------------------------------------------------------------|---------------------------------------------------------------------------------------------------------------------------------------------------------------------------------------------------------------------------------------------------------------------------------------------------------------------------|---|
| 5  | 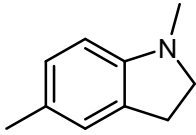   | $^1\text{H NMR}$ (400 MHz, $\text{CDCl}_3$ ) $\delta$ 6.98 – 6.89 (m, 2H), 6.45 (d, 1H), 3.28 (t, 2H), 2.96 – 2.91 (m, 2H), 2.76 (s, 3H), 2.28 (s, 3H).<br>MS: $m/z$ $[\text{M}]^+$ , 147.12                                                                                                                              | 3 |
| 6  |    | $^1\text{H NMR}$ (400 MHz, $\text{CDCl}_3$ ) $\delta$ 7.05 (t, 1H), 6.56 (d, 1H), 6.39 (d, 1H), 3.35 (t, 2H), 2.91 (t, 2H), 2.79 (s, 3H), 2.26 (s, 3H).<br>MS: $m/z$ $[\text{M}]^+$ , 147.13                                                                                                                              | 3 |
| 7  |    | $^1\text{H NMR}$ (400 MHz, $\text{CDCl}_3$ ) $\delta$ 7.00 (d, 1H), 6.23 (d, 1H), 6.12 (d, 1H), 3.82 (s, 3H), 3.35 (t, 2H), 2.92 (t, 2H), 2.78 (s, 3H).<br>$^{13}\text{C NMR}$ (101 MHz, $\text{CDCl}_3$ ) $\delta$ 160.2, 154.8, 124.3, 122.7, 101.63, 94.9, 55.7, 55.5, 36.1, 28.0<br>MS: $m/z$ $[\text{M}]^+$ , 161.10 |   |
| 8  |    | $^1\text{H NMR}$ (400 MHz, $\text{CDCl}_3$ ) $\delta$ 6.78 (t, 1H), 6.69 (d, 1H), 6.47 (d, 1H), 3.78 (s, 3H), 3.27 (t, 2H), 2.97 – 2.91 (m, 2H), 2.75 (s, 3H).<br>MS: $m/z$ $[\text{M}]^+$ , 163.12                                                                                                                       | 5 |
| 9  |  | $^1\text{H NMR}$ (400 MHz, $\text{CDCl}_3$ ) $\delta$ 7.11 (t, 1H), 6.34 (d, 1H), 6.24 (d, 1H), 3.86 (s, 3H), 3.35 (t, 2H), 2.95 (t, 2H), 2.79 (s, 3H).<br>$^{13}\text{C NMR}$ (101 MHz, $\text{CDCl}_3$ ) $\delta$ 156.0, 155.2, 128.8, 102.8, 101.3, 99.2, 56.4, 55.3, 36.5, 25.7.<br>MS: $m/z$ $[\text{M}]^+$ , 163.13 |   |
| 10 |  | $^1\text{H NMR}$ (400 MHz, $\text{CDCl}_3$ ) $\delta$ 7.02 – 6.94 (m, 1H), 6.34 (d, 1H), 6.19 (d, 1H), 3.39 (t, 2H), 2.94 (t, 2H), 2.78 (s, 3H), 1.61 (s, 3H).<br>MS: $m/z$ $[\text{M}]^+$ , 151.08                                                                                                                       | 6 |
| 11 |  | $^1\text{H NMR}$ (400 MHz, $\text{CDCl}_3$ ) $\delta$ 6.90 – 6.74 (m, 2H), 6.40 (d, 1H), 3.31 (t, 2H), 2.98 – 2.92 (m, 2H), 2.76 (s, 3H).<br>MS: $m/z$ $[\text{M}]^+$ , 151.11                                                                                                                                            | 3 |
| 12 |  | $^1\text{H NMR}$ (400 MHz, $\text{CDCl}_3$ ) $\delta$ 7.06 (t, 1H), 6.40 (t, 1H), 6.28 (d, 1H), 3.40 (t, 2H), 3.02 (t, 2H), 2.79 (d, 3H).<br>MS: $m/z$ $[\text{M}]^+$ , 151.10                                                                                                                                            | 7 |
| 13 |  | $^1\text{H NMR}$ (400 MHz, $\text{CDCl}_3$ ) $\delta$ 7.04 – 6.94 (m, 1H), 6.34 (d, 1H), 6.19 (d, 1H), 3.39 (t, 2H), 2.93 (t, 2H), 2.77 (s, 3H).<br>MS: $m/z$ $[\text{M}]^+$ , 167.06                                                                                                                                     | 3 |

|    |                                                                                     |                                                                                                                                                                                                                                                                                                                                                              |   |
|----|-------------------------------------------------------------------------------------|--------------------------------------------------------------------------------------------------------------------------------------------------------------------------------------------------------------------------------------------------------------------------------------------------------------------------------------------------------------|---|
| 14 | 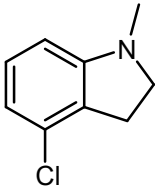   | $^1\text{H NMR}$ (400 MHz, $\text{CDCl}_3$ ) $\delta$ 7.03 (t, 1H), 6.66 (d, 1H), 6.36 (d, 1H), 3.45 – 3.35 (m, 2H), 3.03 (t, 2H), 2.79 (s, 3H).<br>MS: $m/z$ $[\text{M}]^+$ , 167.07                                                                                                                                                                        | 7 |
| 15 |    | $^1\text{H NMR}$ (400 MHz, $\text{CDCl}_3$ ) $\delta$ 7.15 – 7.06 (m, 1H), 7.02 – 6.95 (m, 1H), 6.64 (t, 2H), 3.29 – 3.21 (m, 2H), 2.92 (s, 3H), 2.80 (t, 2H), 2.07 – 1.97 (m, 2H)<br>$^{13}\text{C NMR}$ (101 MHz, $\text{CDCl}_3$ ) $\delta$ 147.6, 128.9, 127.1, 122.9, 116.2, 111.0, 51.3, 39.2, 27.8, 22.5.<br>MS: $m/z$ $[\text{M}]^+$ , 147.12        | 3 |
| 16 |    | $^1\text{H NMR}$ (400 MHz, $\text{CDCl}_3$ ) $\delta$ 6.92 (d, 1H), 6.86 – 6.80 (m, 1H), 6.58 (d, 1H), 3.24 – 3.16 (m, 2H), 2.89 (s, 3H), 2.78 (t, 2H), 2.25 (s, 3H), 2.08 – 1.95 (m, 2H).<br>MS: $m/z$ $[\text{M}]^+$ , 161.07                                                                                                                              | 8 |
| 17 |   | $^1\text{H NMR}$ (400 MHz, $\text{CDCl}_3$ ) $\delta$ 6.91 (d, 1H), 6.50 (d, 2H), 3.29 – 3.22 (m, 2H), 2.94 (d, 3H), 2.79 (t, 2H), 2.34 (s, 3H), 2.03 (q, 2H).<br>$^{13}\text{C NMR}$ (101 MHz, $\text{CDCl}_3$ ) $\delta$ 146.7, 136.6, 128.8, 120.0, 117.1, 111.9, 51.5, 39.2, 27.5, 22.7, 21.7.<br>MS: $m/z$ $[\text{M}]^+$ , 161.09                      | 3 |
| 18 |  | $^1\text{H NMR}$ (400 MHz, $\text{CDCl}_3$ ) $\delta$ 6.93 (d, 1H), 6.84 (d, 1H), 6.58 (d, 1H), 3.24 – 3.17 (m, 2H), 2.90 (s, 3H), 2.79 (t, 2H), 2.26 (s, 3H), 2.08 – 1.97 (m, 2H).<br>$^{13}\text{C NMR}$ (101 MHz, $\text{CDCl}_3$ ) $\delta$ 144.8, 129.7, 127.5, 125.6, 123.2, 111.5, 51.6, 39.5, 27.8, 22.7, 20.3.<br>MS: $m/z$ $[\text{M}]^+$ , 161.10 | 3 |
| 19 |  | $^1\text{H NMR}$ (400 MHz, $\text{CDCl}_3$ ) $\delta$ 7.09 (t, 1H), 6.62 (t, 2H), 3.36 – 3.16 (m, 2H), 2.97 (d, 3H), 2.75 (t, 2H), 2.29 (s, 3H), 2.12 (m, 2H).<br>MS: $m/z$ $[\text{M}]^+$ , 161.10                                                                                                                                                          | 7 |
| 20 |  | $^1\text{H NMR}$ (400 MHz, $\text{CDCl}_3$ ) $\delta$ 6.72 (d, 1H), 6.66 – 6.59 (m, 2H), 3.78 (d, 3H), 3.20 – 3.13 (m, 2H), 2.88 (d, 3H), 2.81 (t, 2H)<br>$^{13}\text{C NMR}$ (101 MHz, $\text{CDCl}_3$ ) $\delta$ 151.4, 141.7, 124.7, 115.1, 112.6, 112.3, 55.8, 51.7, 40.0, 28.0, 22.7.<br>MS: $m/z$ $[\text{M}]^+$ , 177.09                              | 3 |
| 21 |  | $^1\text{H NMR}$ (400 MHz, $\text{CDCl}_3$ ) $\delta$ 7.09 (t, 1H), 6.37 (d, 1H), 6.32 (d, 1H), 3.84 (s, 3H), 3.24 – 3.17 (m, 2H), 2.93 (s, 3H), 2.72 (t, 2H), 2.06 – 1.96 (m, 2H).<br>$^{13}\text{C NMR}$ (101 MHz, $\text{CDCl}_3$ ) $\delta$ 157.4, 148.0, 126.8, 110.9, 104.9, 99.2, 55.4, 51.1, 39.9, 22.0, 21.1.<br>MS: $m/z$ $[\text{M}]^+$ , 177.08  |   |



|    |                                                                                   |                                                                                                                                                                                                                                                                                                                            |   |
|----|-----------------------------------------------------------------------------------|----------------------------------------------------------------------------------------------------------------------------------------------------------------------------------------------------------------------------------------------------------------------------------------------------------------------------|---|
| 22 | 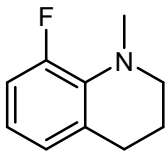 | $^1\text{H NMR}$ (400 MHz, $\text{CDCl}_3$ ) $\delta$ 6.94 – 6.50 (m, 3H), 3.21 – 3.12 (m, 2H), 3.06 – 2.92 (m, 3H), 2.78 (t, 2H), 1.98 – 1.87 (m, 2H).<br>$^{13}\text{C NMR}$ (101 MHz, $\text{CDCl}_3$ ) $\delta$ 155.4, 136.1, 129.3, 124.7, 119.0, 114.0, 52.8, 42.7, 28.1, 20.2.<br>MS: $m/z$ $[\text{M}]^+$ , 165.06 |   |
| 23 |  | $^1\text{H NMR}$ (400 MHz, $\text{CDCl}_3$ ) $\delta$ 6.81 (m, 1H), 6.74 (m, 1H), 6.55 (m, 1H), 3.20 (t, 2H), 2.89 (s, 3H), 2.79 (t, 2H), 2.12 (m, 2H).<br>$^{13}\text{C NMR}$ (101 MHz, $\text{CDCl}_3$ ) $\delta$ 153.9, 143.4, 124.6, 115.5, 115.2, 113.1, 51.4, 39.7, 27.5, 22.5.<br>MS: $m/z$ $[\text{M}]^+$ , 165.05 | 3 |

All the GC-MS spectra and data of the products were shown as follow:

(1). GC-MS spectrum for substrate: indole

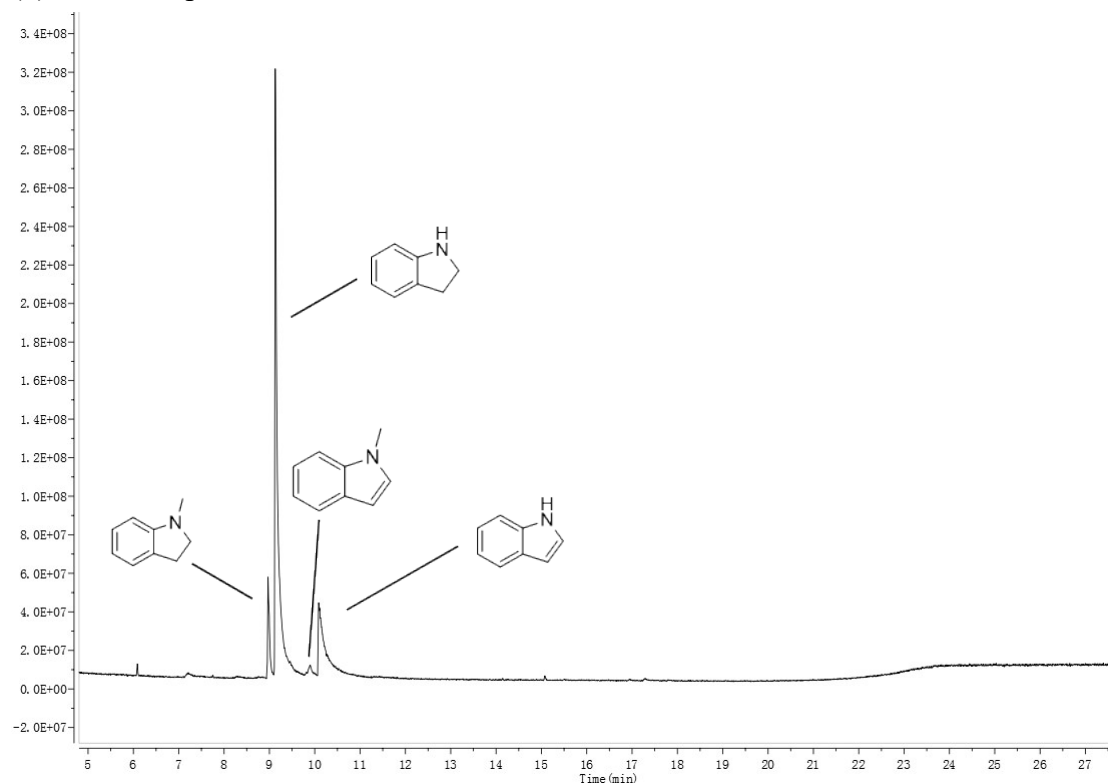

RT: 8.43 - 11.17

Number of detected peaks: 3

| Apex RT | Start RT | End RT | Area%Area      | Height | %Height       |       |
|---------|----------|--------|----------------|--------|---------------|-------|
| 8.97    | 8.94     | 9.04   | 139792991.574  | 8.48   | 53575126.858  | 13.05 |
| 9.13    | 9.10     | 9.48   | 1214240586.970 | 73.69  | 317906620.907 | 77.44 |
| 10.09   | 10.06    | 10.36  | 293782520.736  | 17.83  | 39019590.300  | 9.51  |

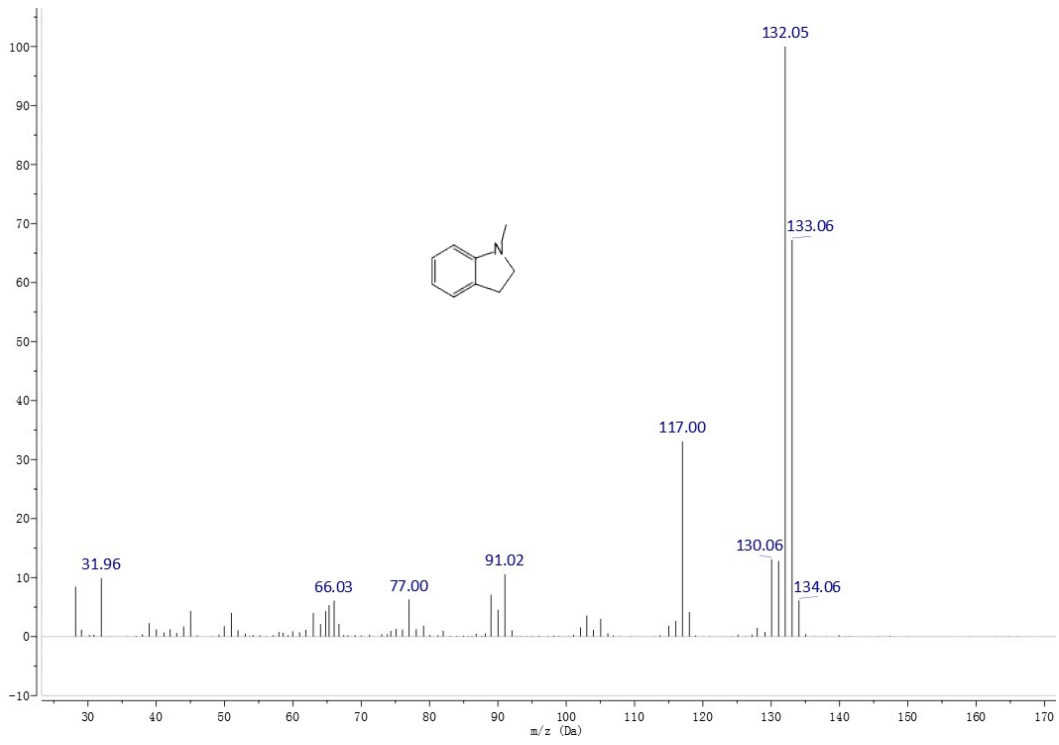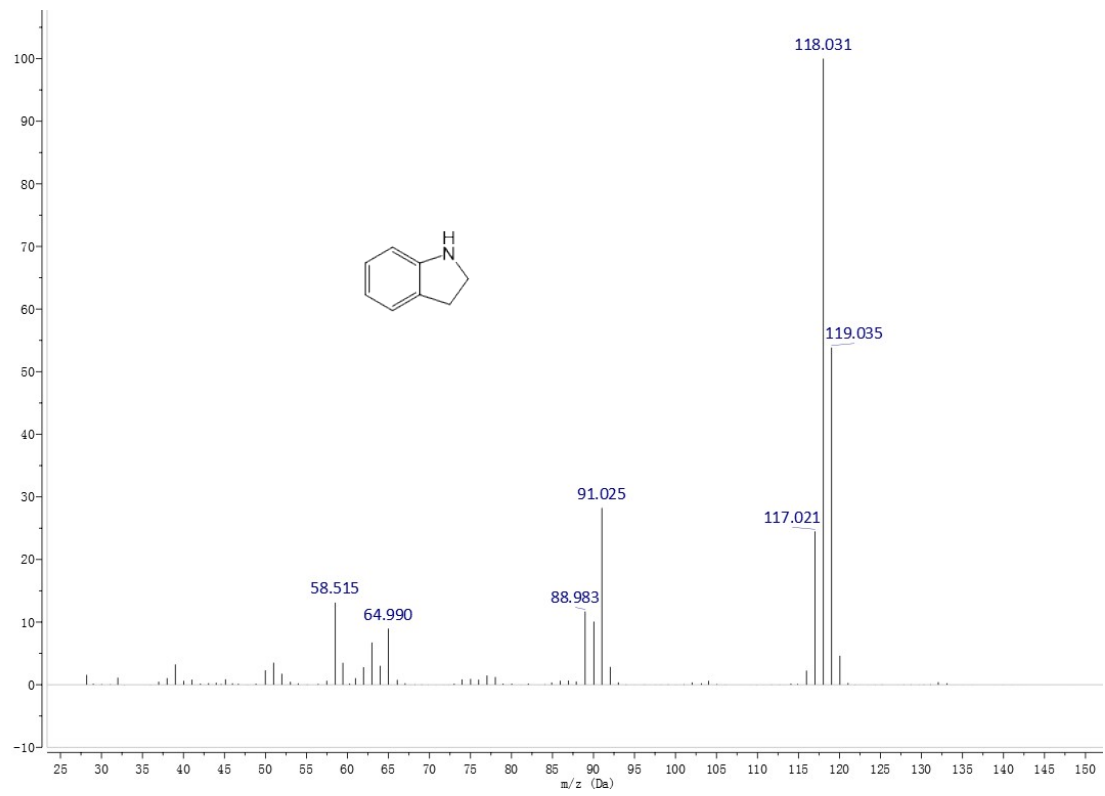

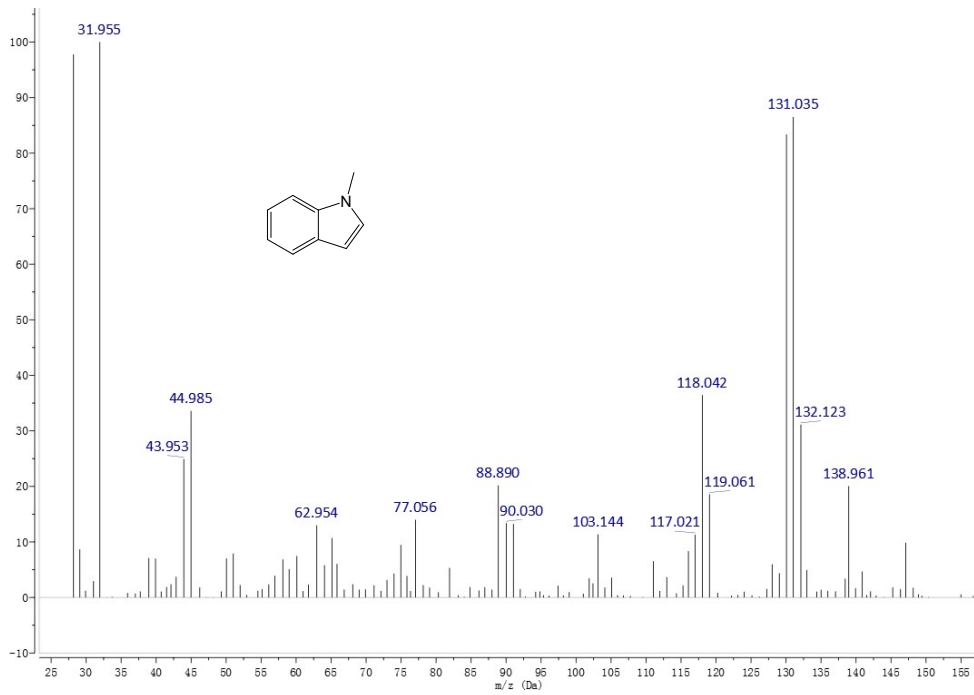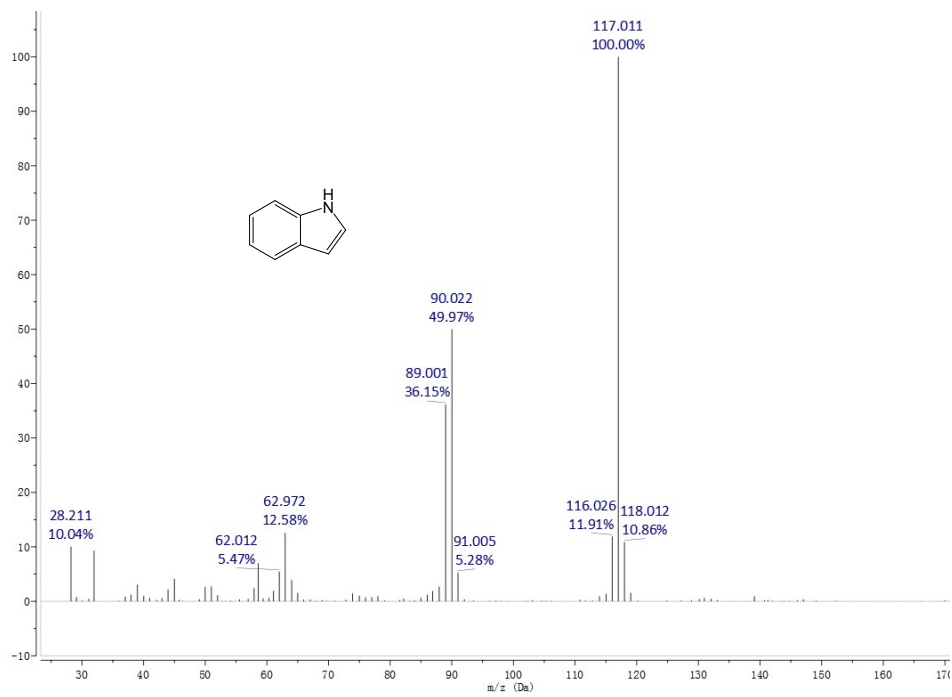

(2). GC-MS spectrum for substrate: 6-methylindole

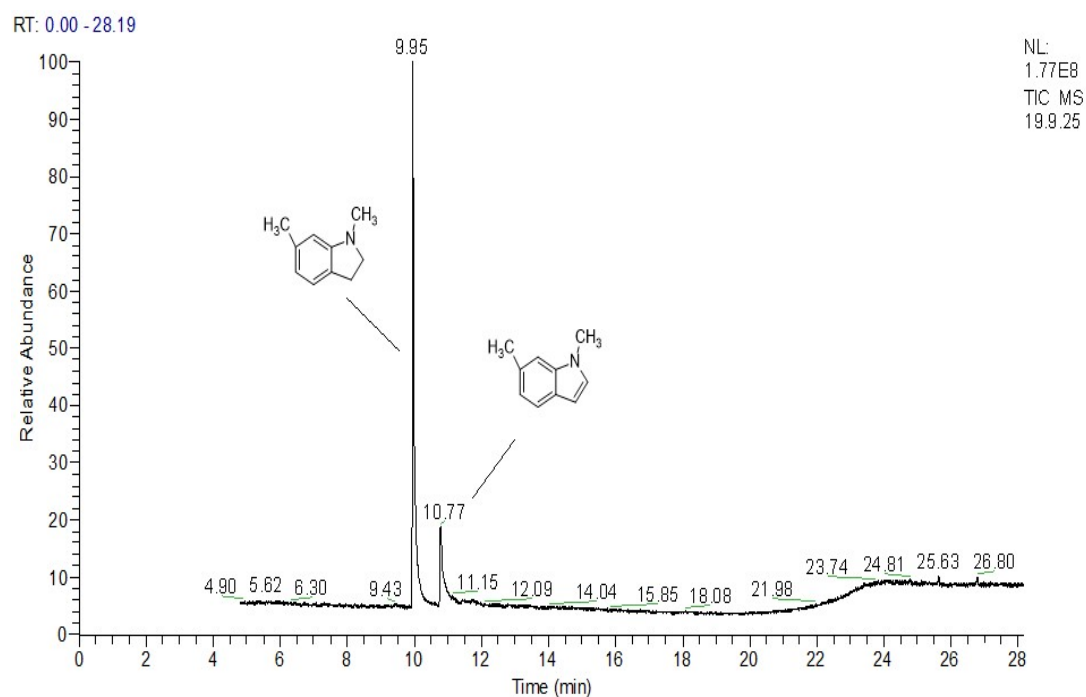

Number of detected peaks: 2

| Apex RT | Start RT | End RT | Area%Area     | Height | %Height             |
|---------|----------|--------|---------------|--------|---------------------|
| 9.95    | 9.92     | 10.19  | 615118854.586 | 78.55  | 171518896.037 87.46 |
| 10.77   | 10.74    | 11.01  | 167985117.661 | 21.45  | 24583518.453 12.54  |

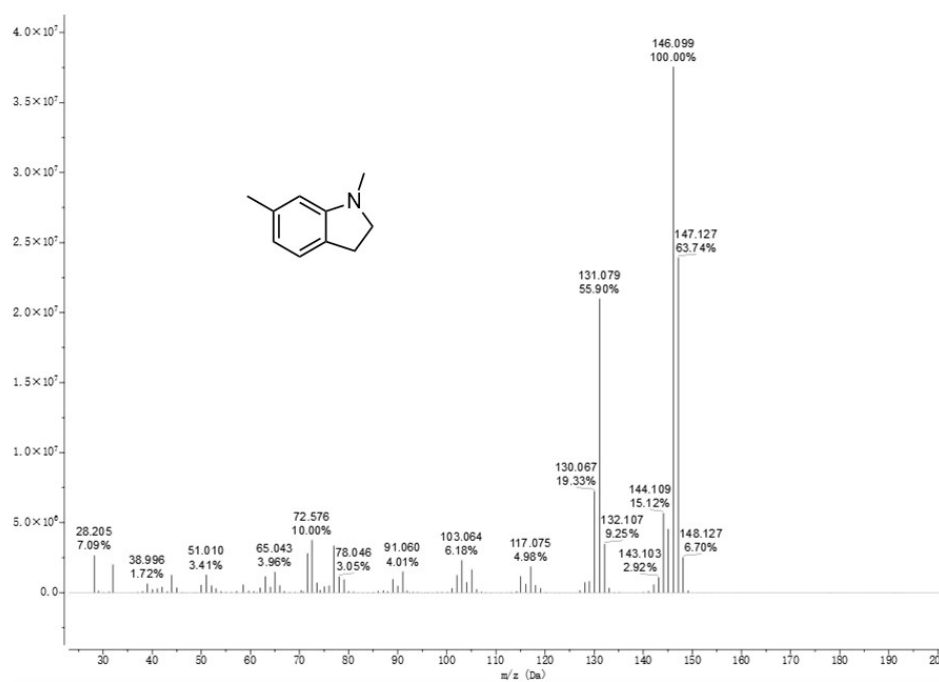

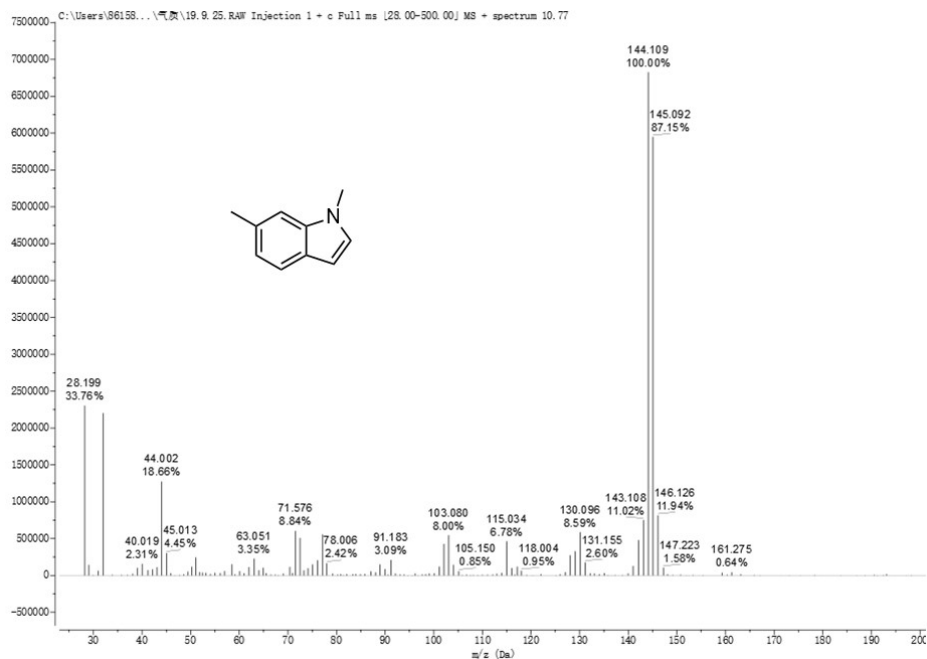

(3). GC-MS spectrum for substrate: 5-methylindole

RT: 0.00 - 28.20

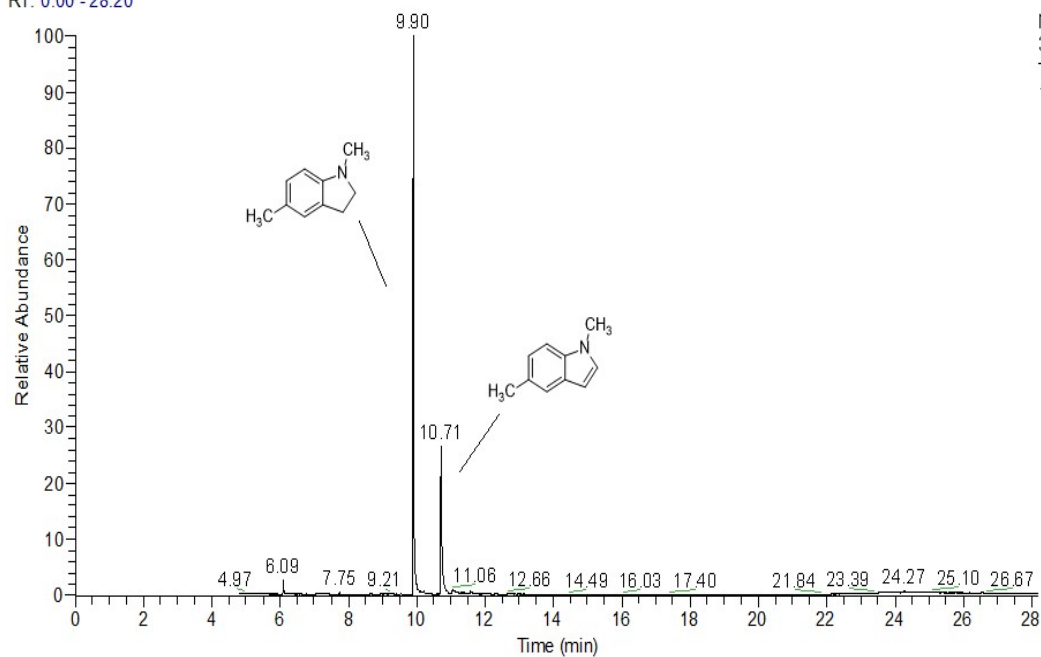

RT: 6.06 - 13.68

Number of detected peaks: 3

| Apex RT | Start RT | End RT | Area%Area      | Height | %Height              |
|---------|----------|--------|----------------|--------|----------------------|
| 9.90    | 9.87     | 10.16  | 5195022147.384 | 70.81  | 3320317814.582 78.54 |
| 10.71   | 10.68    | 10.94  | 1973687093.621 | 26.90  | 884460539.255 20.92  |
| 11.06   | 11.02    | 11.24  | 168195978.234  | 2.29   | 22602286.381 0.53    |

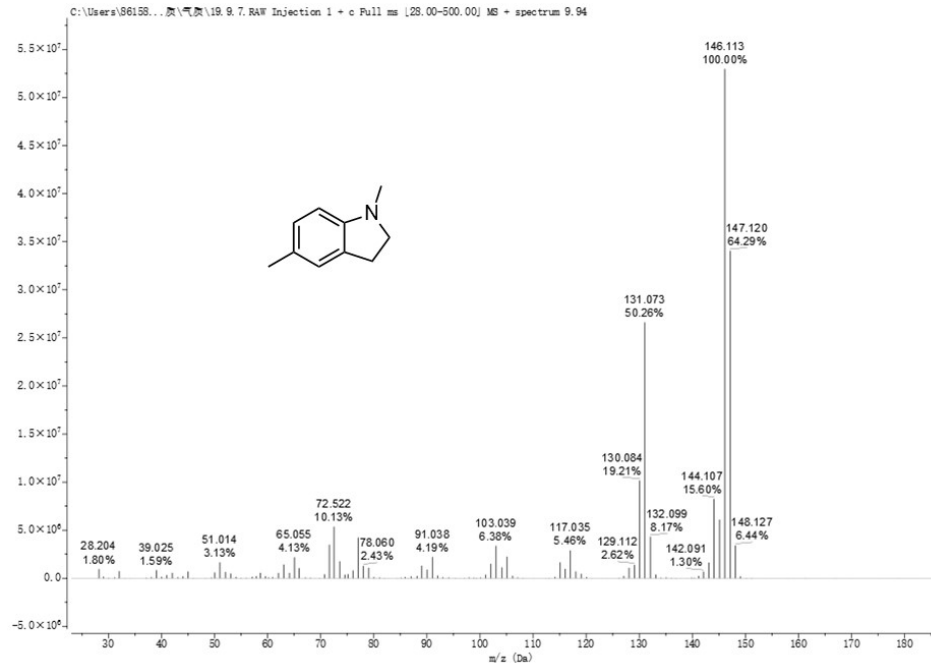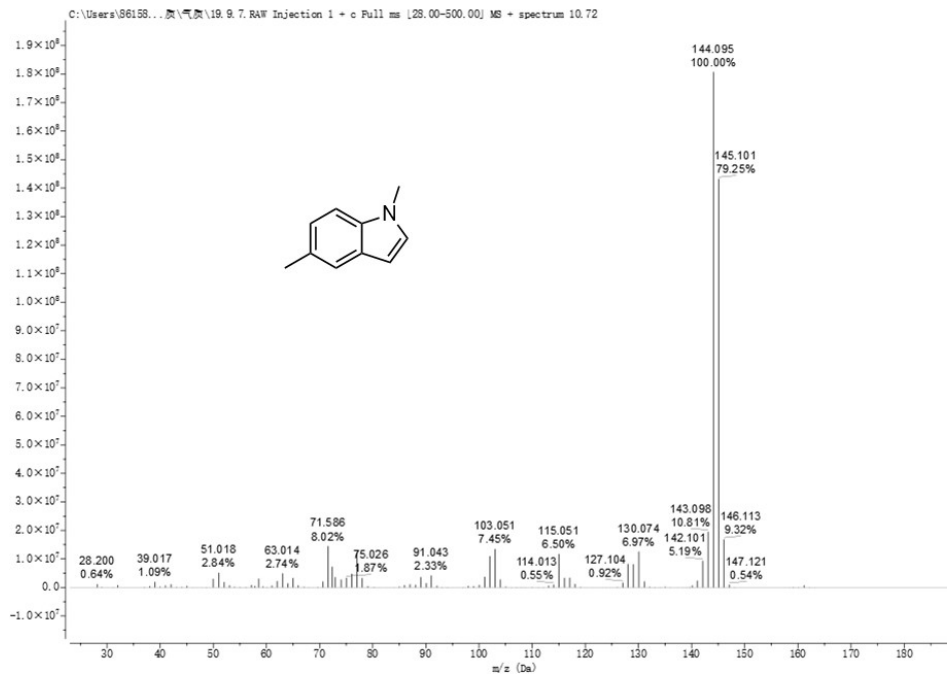

(4). GC-MS spectrum for substrate: 4-methylindole

RT: 0.00 - 28.19

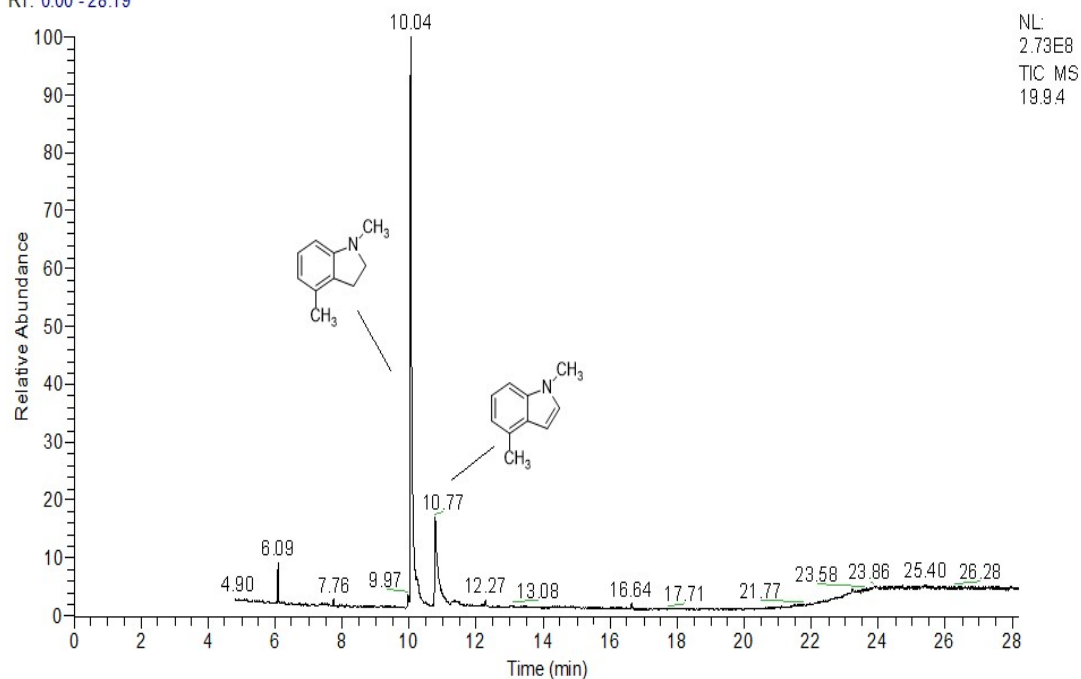

RT: 9.84 - 12.54

Number of detected peaks: 3

| Apex RT | Start RT | End RT | Area%Area     | Height | %Height             |
|---------|----------|--------|---------------|--------|---------------------|
| 10.04   | 10.01    | 10.35  | 827762868.216 | 74.79  | 266667968.272 85.76 |
| 10.77   | 10.74    | 11.11  | 271504415.203 | 24.53  | 42694610.385 13.73  |
| 11.35   | 11.28    | 11.45  | 7558625.043   | 0.68   | 1582249.781 0.51    |

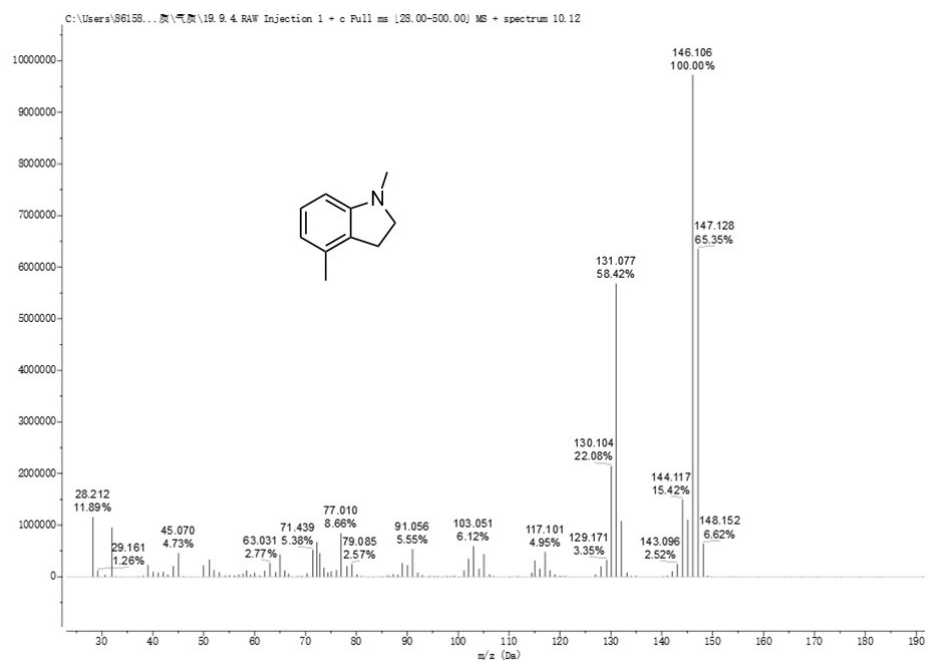

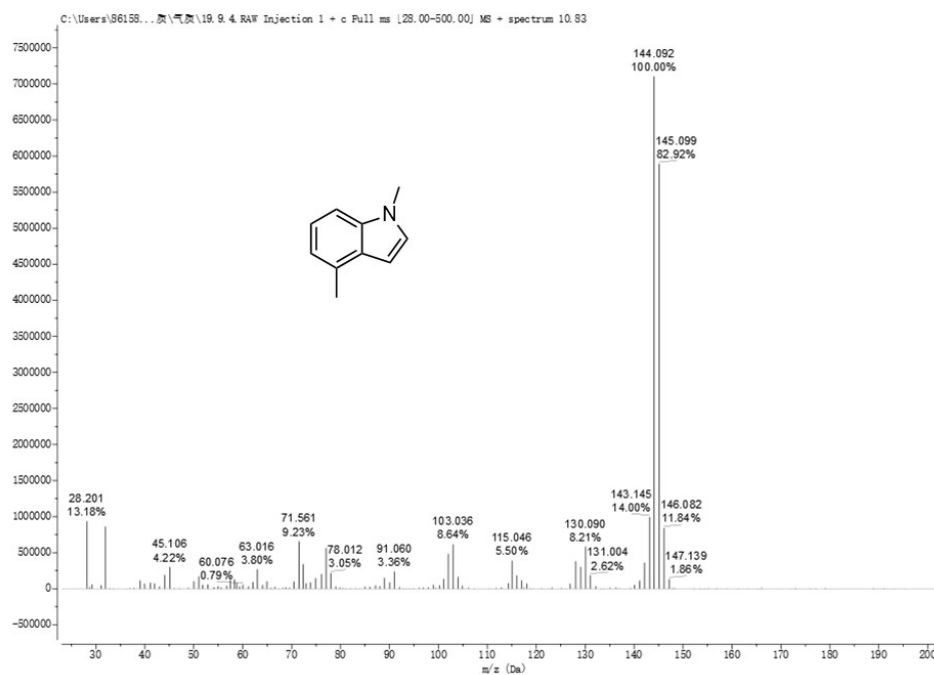

(5). GC-MS spectrum for substrate: 6-methoxy-1H-indole

RT: 0.21 - 17.77

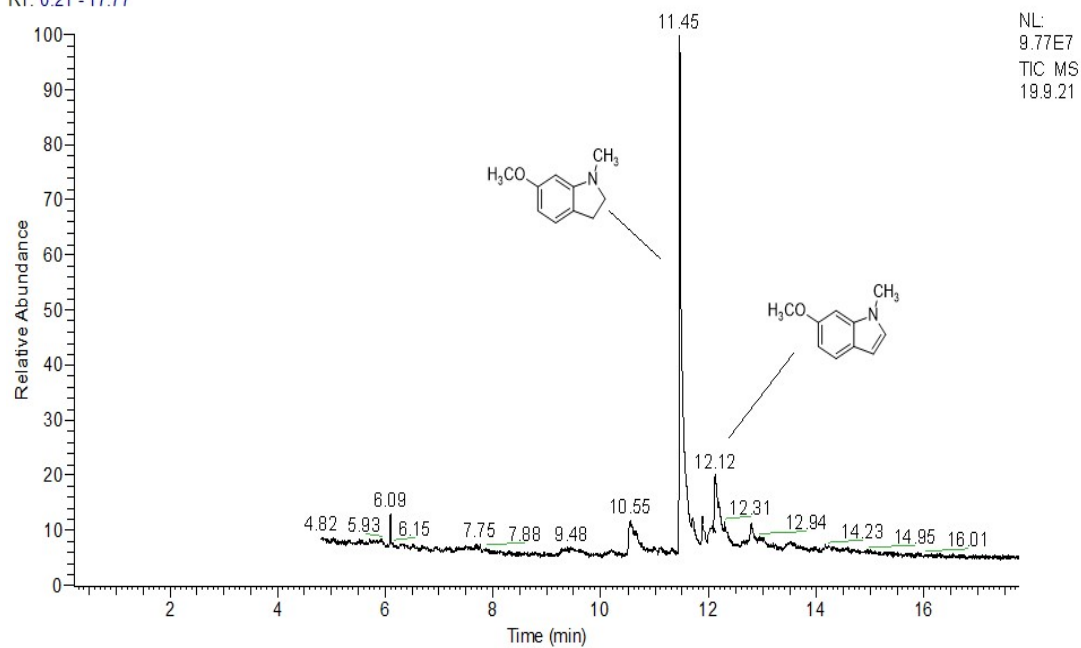

NL:  
9.77E7  
TIC MS  
19.9.21

RT: 10.97 - 13.56

Number of detected peaks: 2

| Apex RT | Start RT | End RT | Area%Area     | Height | %Height            |
|---------|----------|--------|---------------|--------|--------------------|
| 11.45   | 11.43    | 11.69  | 377534738.449 | 87.00  | 91727238.713 89.12 |
| 12.12   | 12.09    | 12.24  | 56396734.334  | 13.00  | 11203060.375 10.88 |



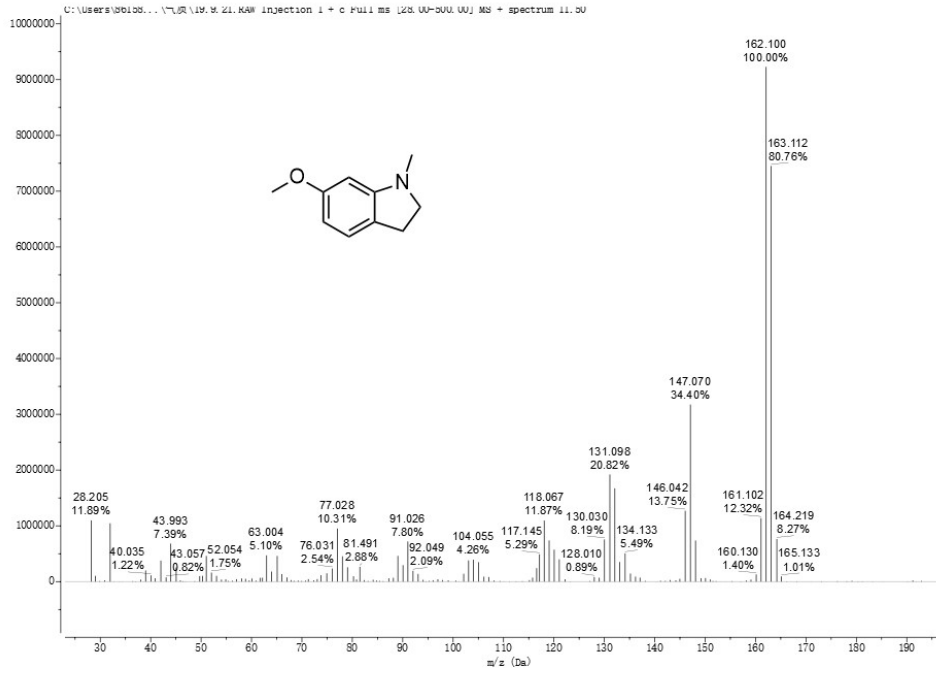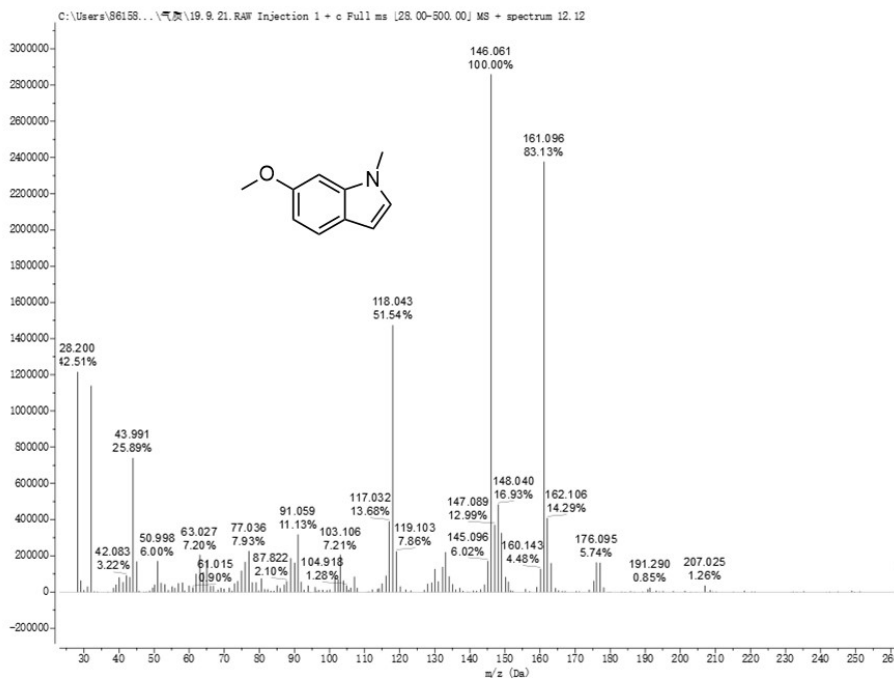

(6). GC-MS spectrum for substrate: 5-methoxy-1H-indole

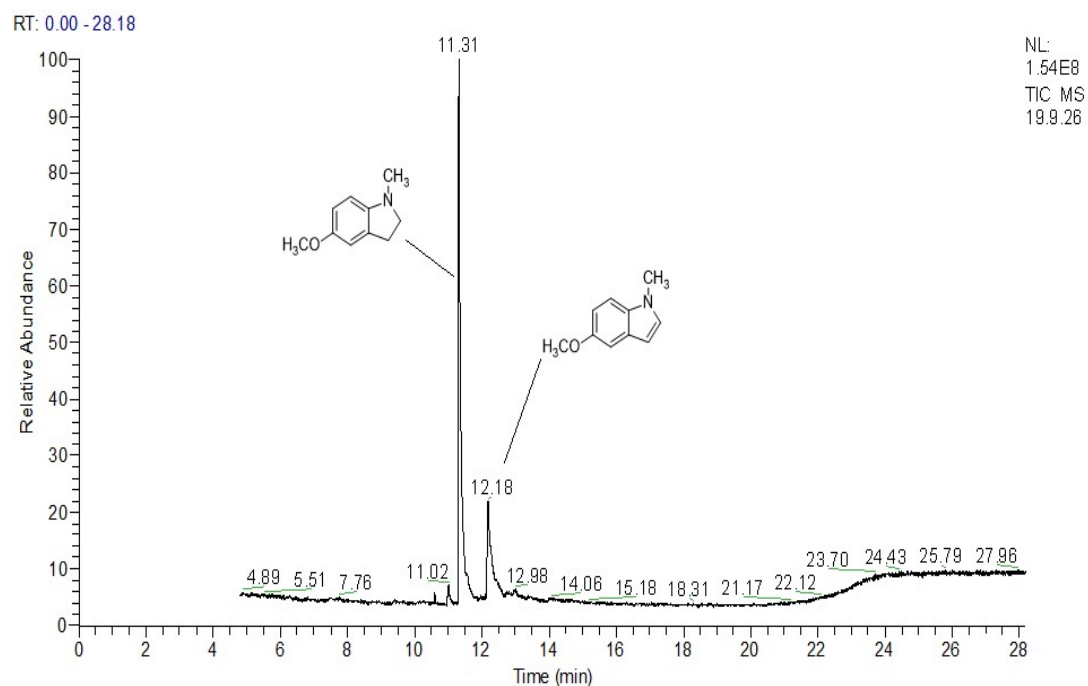

RT: 9.81 - 15.11

Number of detected peaks: 2

| Apex RT | Start RT | End RT | Area%Area     | Height | %Height             |
|---------|----------|--------|---------------|--------|---------------------|
| 11.31   | 11.29    | 11.74  | 684074550.953 | 74.01  | 149505959.704 84.18 |
| 12.18   | 12.16    | 12.58  | 240194161.457 | 25.99  | 28101364.632 15.82  |

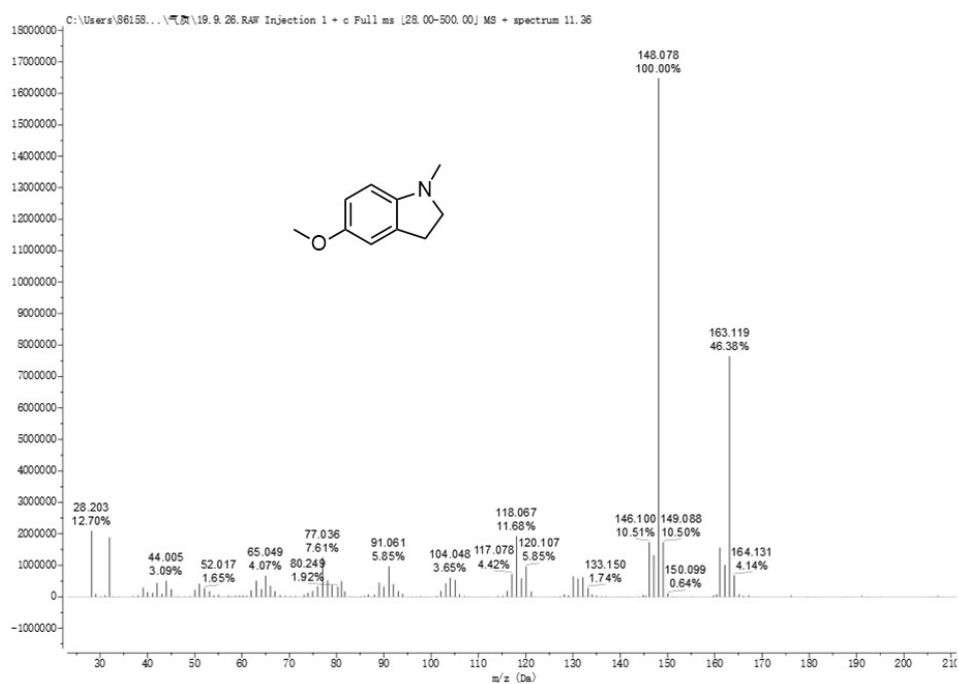

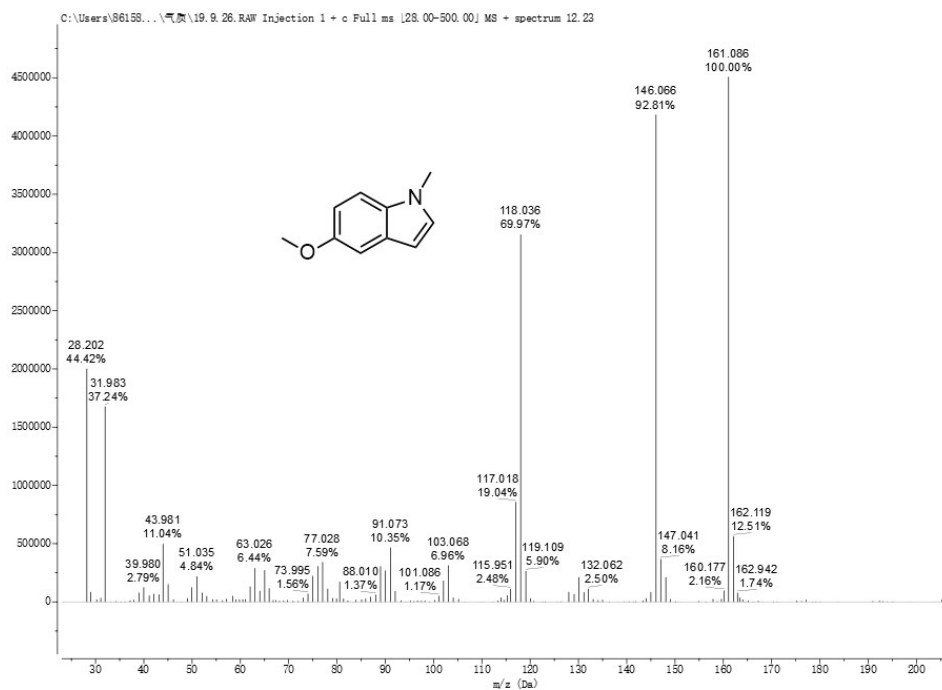

(7). GC-MS spectrum for substrate: 4-methoxy-1H-indole

RT: 0.00 - 28.20

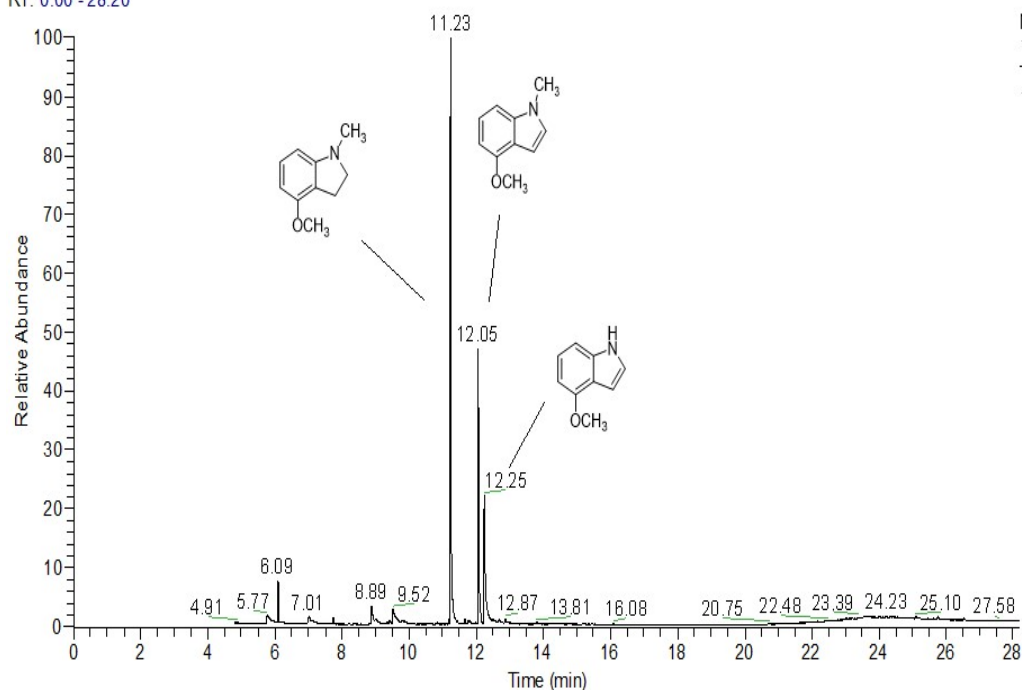

NL:  
1.83E9  
TIC MS  
19.9.1

RT: 10.37 - 14.00

Number of detected peaks: 4

| Apex RT | Start RT | End RT | Area%Area      | Height | %Height              |
|---------|----------|--------|----------------|--------|----------------------|
| 11.23   | 11.20    | 11.53  | 2941429174.550 | 52.63  | 1824214091.880 59.04 |

|       |       |       |                |       |               |       |
|-------|-------|-------|----------------|-------|---------------|-------|
| 11.82 | 11.74 | 11.87 | 50885801.751   | 0.91  | 9480786.580   | 0.31  |
| 12.05 | 12.02 | 12.21 | 1504997305.836 | 26.93 | 856099687.587 | 27.71 |
| 12.25 | 12.24 | 12.47 | 1092068605.082 | 19.54 | 400056718.147 | 12.95 |

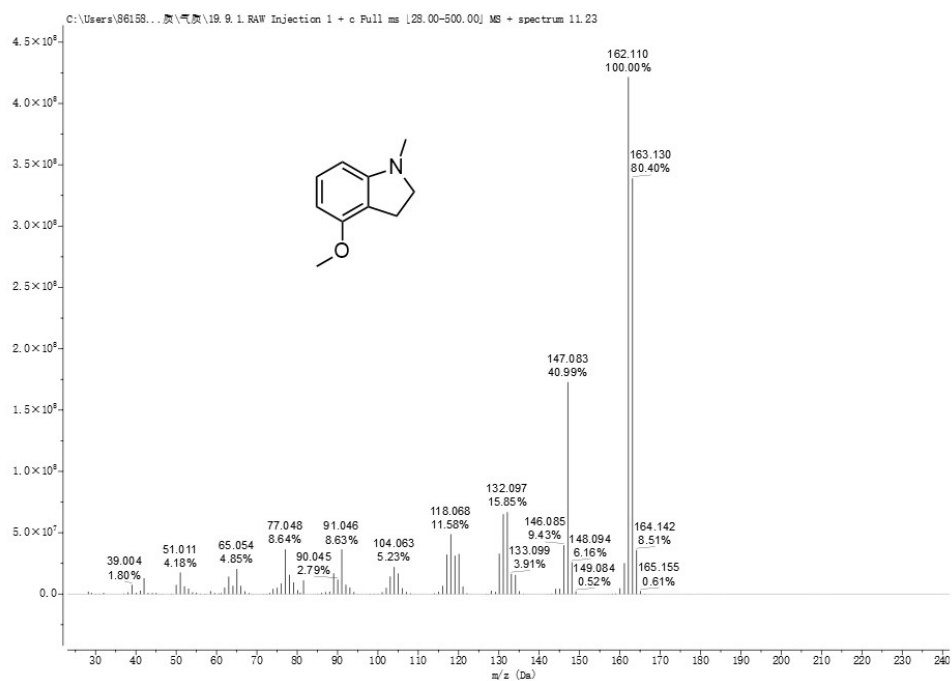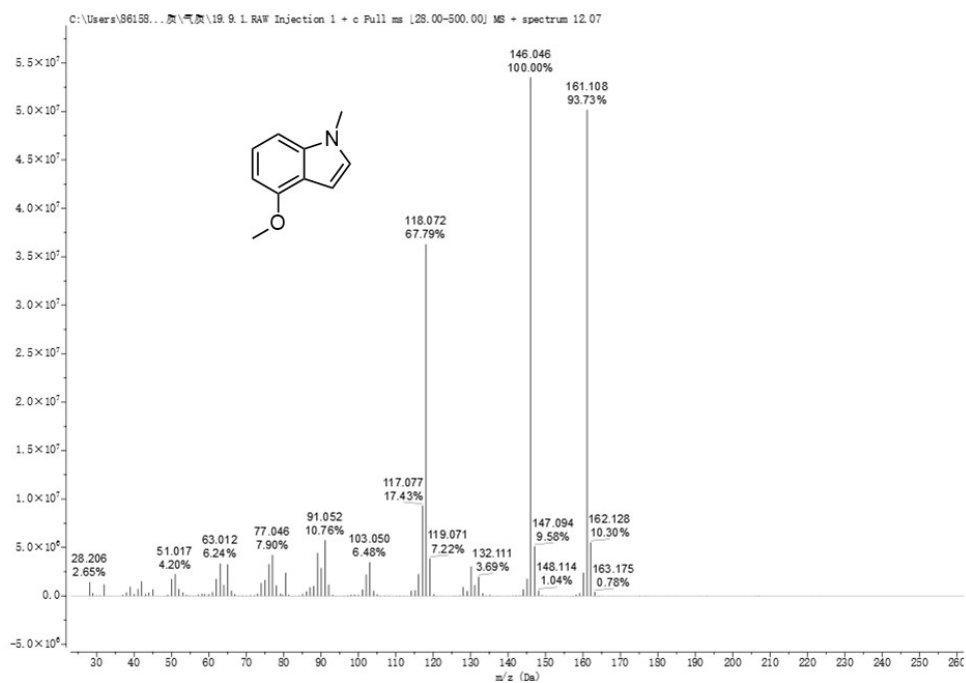

(8). GC-MS spectrum for substrate: 6-fluoroindole

RT: 0.09 - 16.69

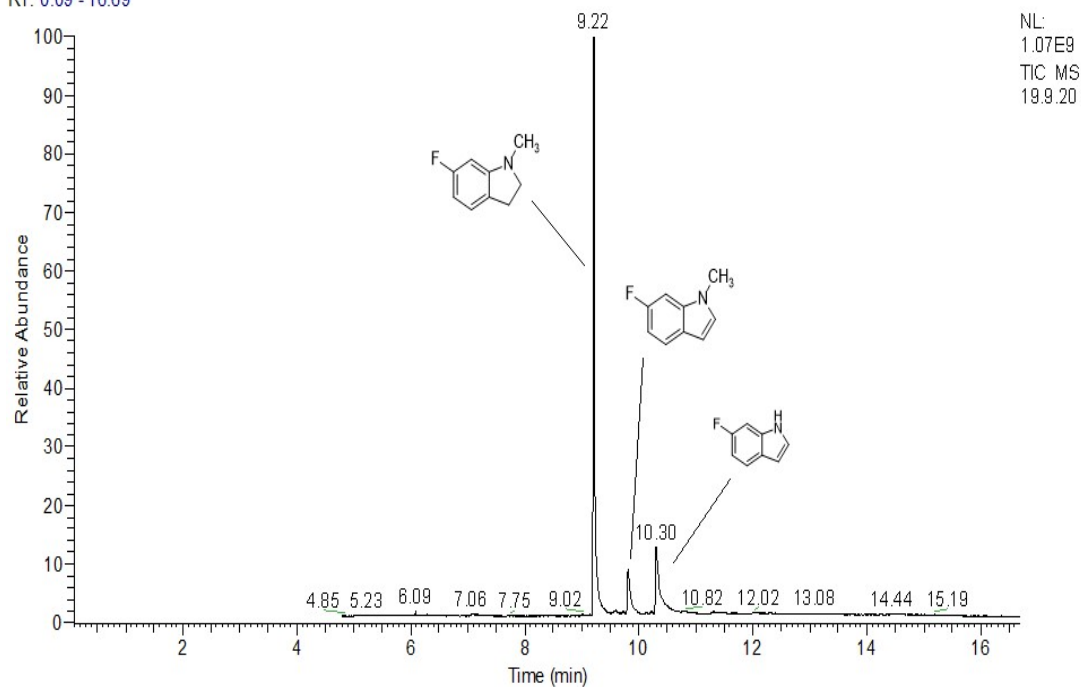

RT: 8.76 - 11.88

Number of detected peaks: 3

| Apex RT | Start RT | End RT | Area           | %Area | Height         | %Height |
|---------|----------|--------|----------------|-------|----------------|---------|
| 9.22    | 9.19     | 9.48   | 1945334308.656 | 68.08 | 1063441748.747 | 83.66   |
| 9.82    | 9.78     | 9.96   | 259090976.968  | 9.07  | 81552111.990   | 6.42    |
| 10.30   | 10.27    | 10.58  | 652944669.076  | 22.85 | 126194824.077  | 9.93    |

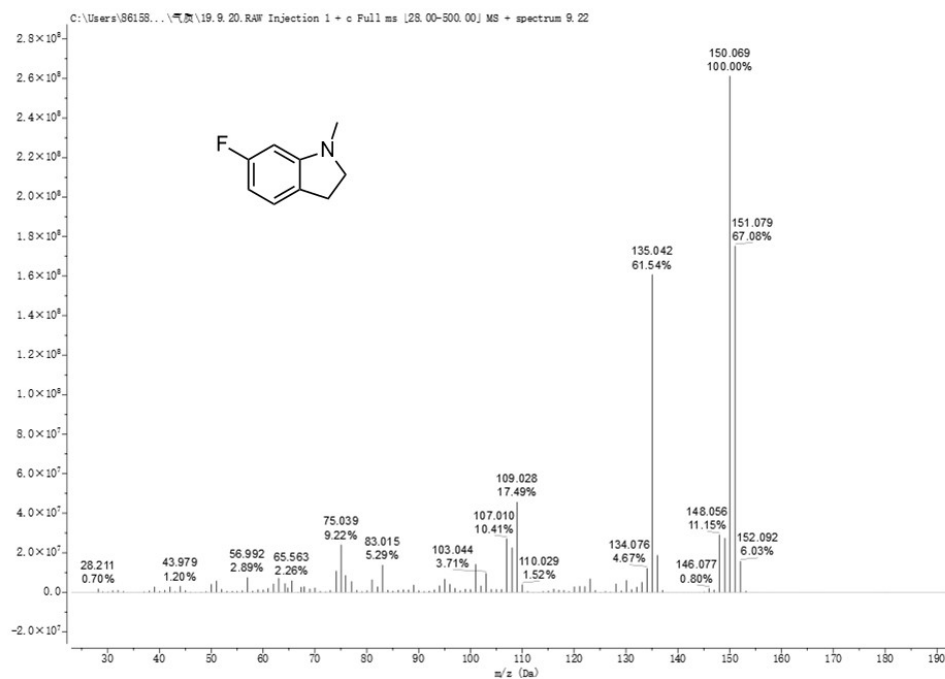

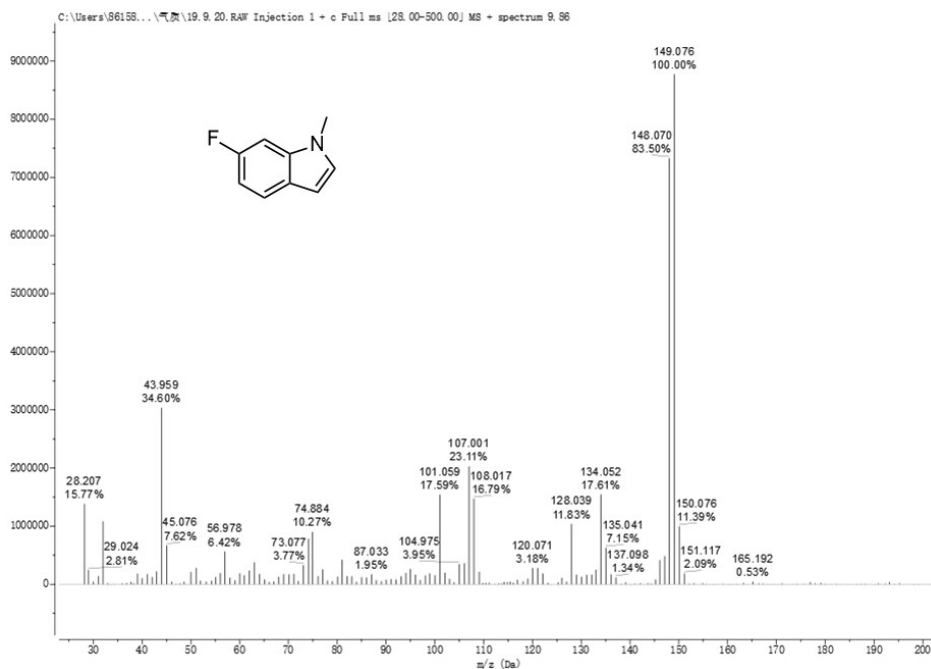

(9). GC-MS spectrum for substrate: 5-fluoroindole

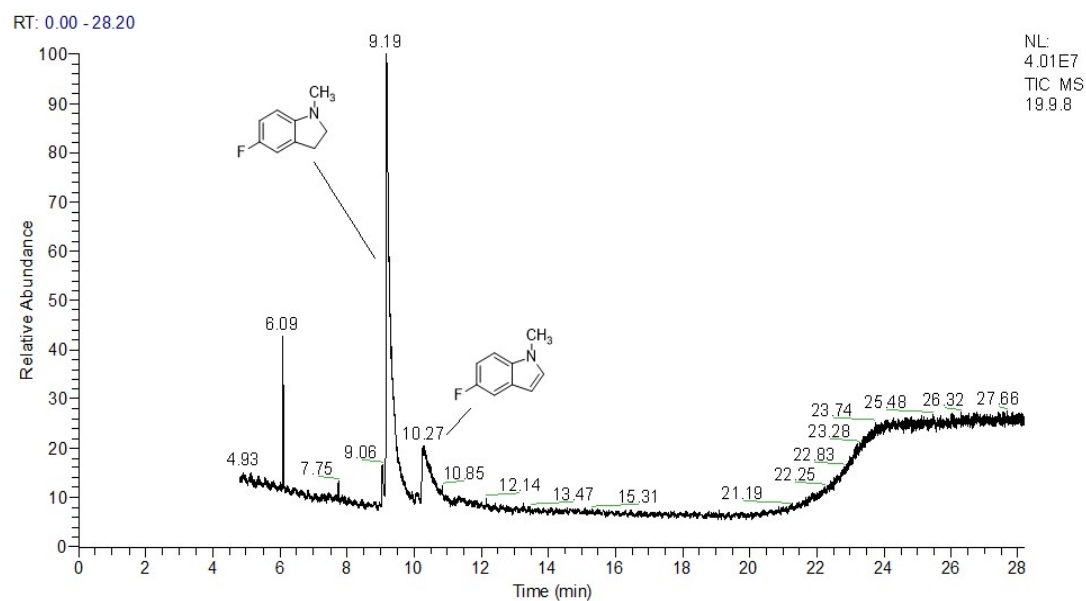

RT: 0.00 - 28.20

Number of detected peaks: 2

Apex RT Start RT End RT Area%Area Height %Height

9.19 9.08 9.90 378567507.299 76.14 37214218.615 87.72

10.27 10.21 11.09 118661706.663 23.86 5209109.789 12.28

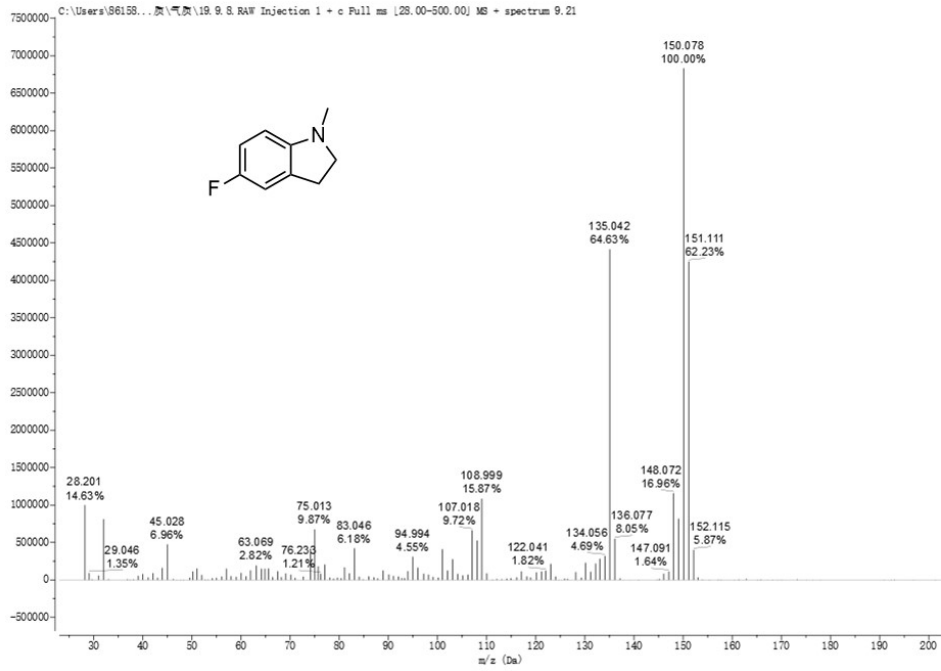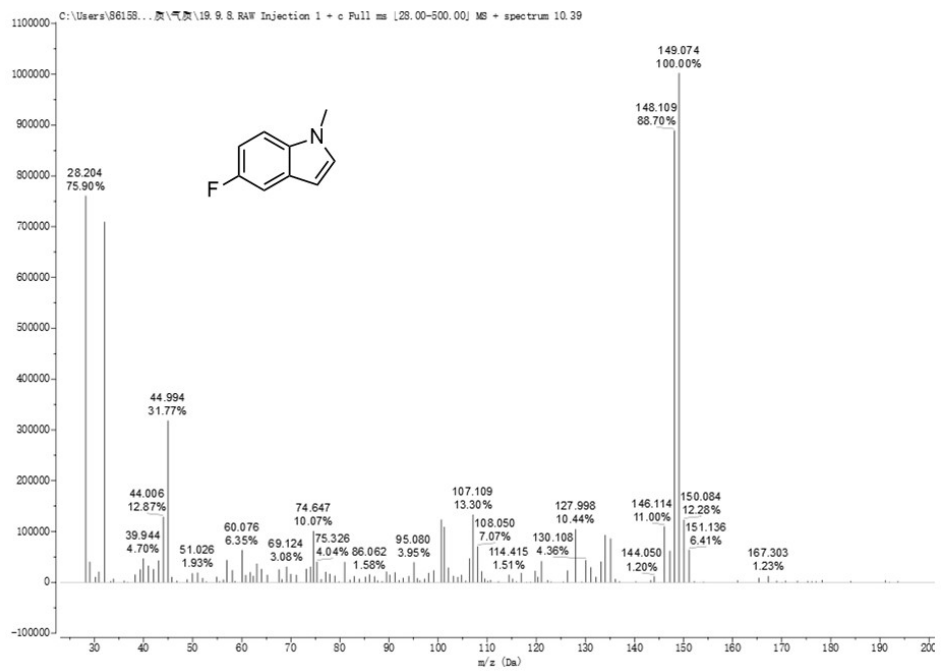

(10). GC-MS spectrum for substrate: 4-fluoroindole

RT: 0.00 - 28.19

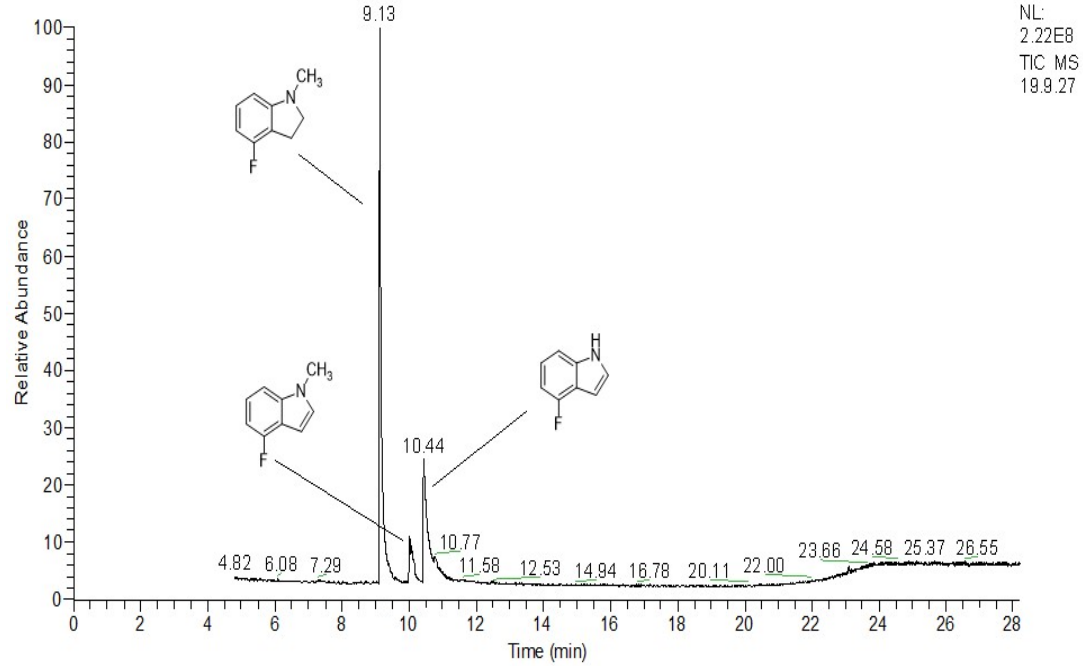

NL:  
2.22E8  
TIC MS  
19.9.27

RT: 8.85 - 11.80

Number of detected peaks: 3

| Apex RT | Start RT | End RT | Area          | %Area | Height        | %Height |
|---------|----------|--------|---------------|-------|---------------|---------|
| 9.13    | 9.10     | 9.52   | 857198738.440 | 60.98 | 217314781.528 | 75.91   |
| 10.01   | 9.97     | 10.26  | 156369447.318 | 11.12 | 19802625.197  | 6.92    |
| 10.44   | 10.41    | 10.73  | 392138964.416 | 27.90 | 49163916.872  | 17.17   |

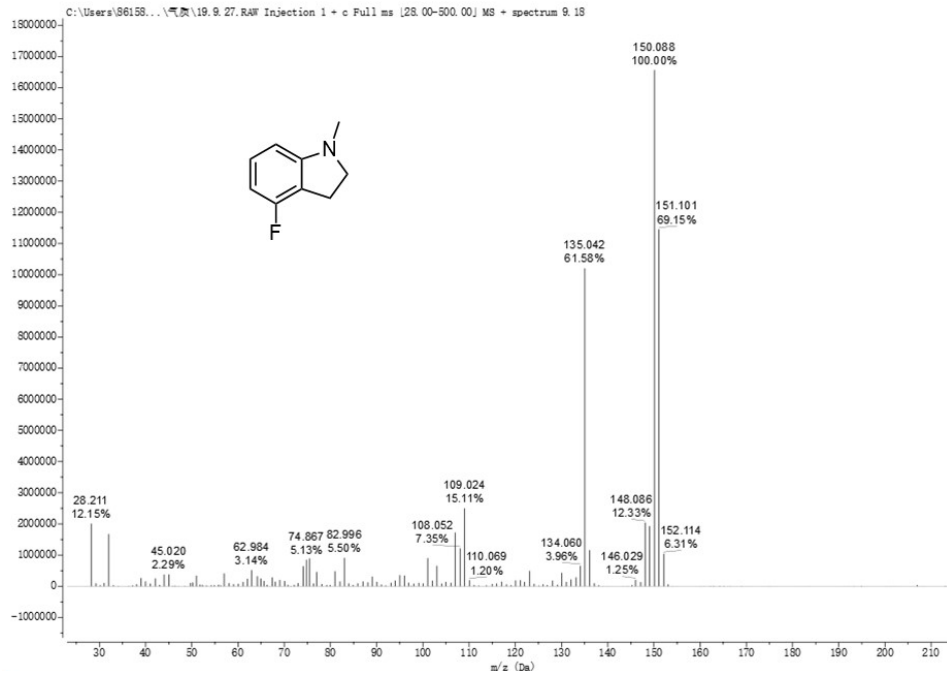



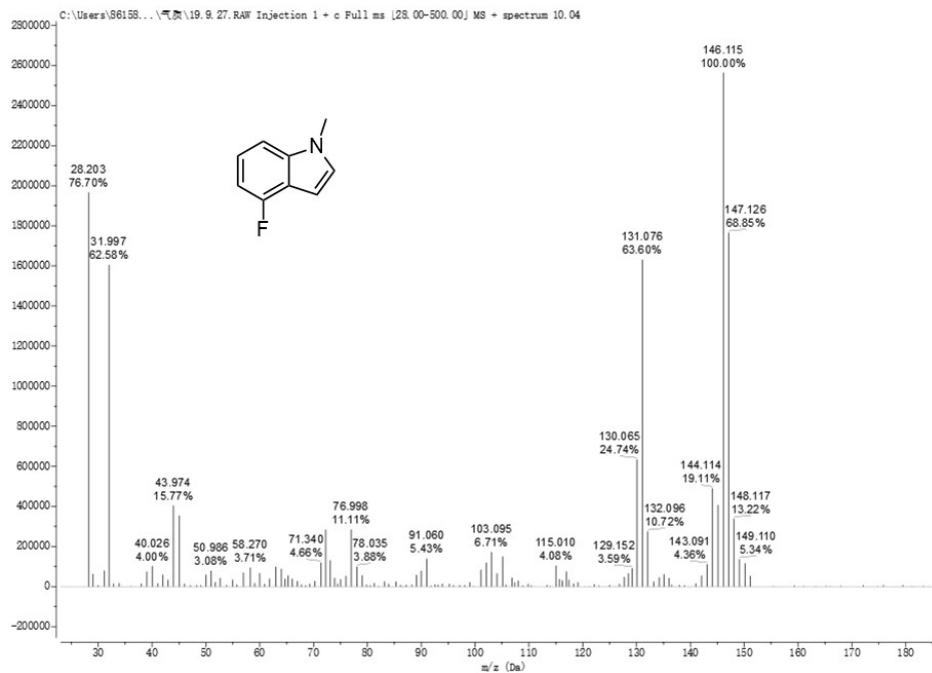

(11). GC-MS spectrum for substrate: 6-chloroindole

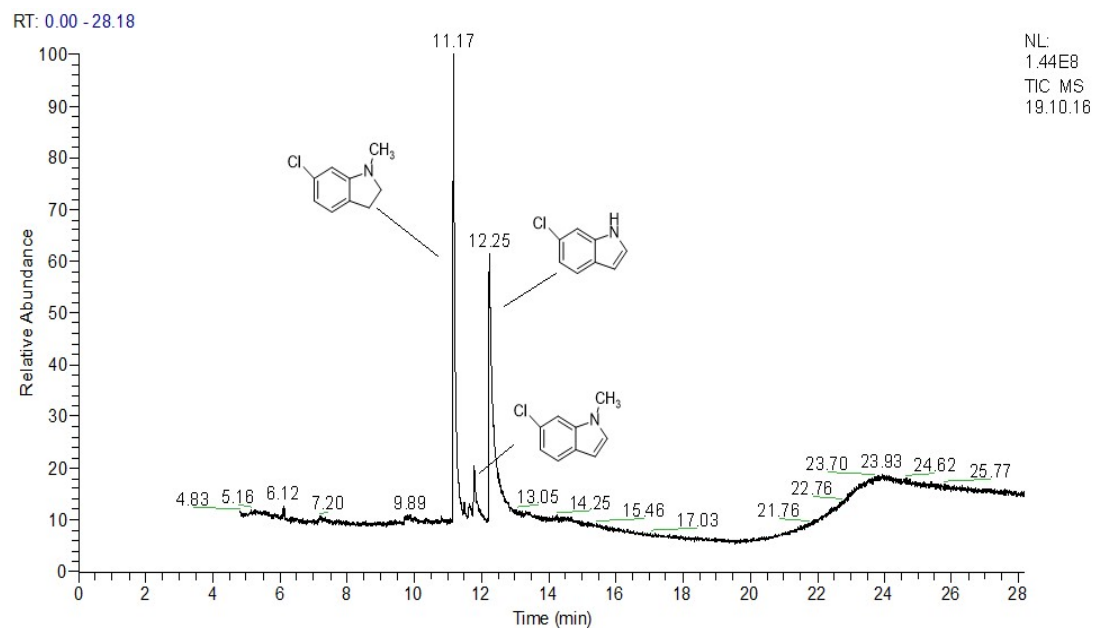

RT: 9.10 - 14.78

Number of detected peaks: 3

| Apex RT | Start RT | End RT | Area%Area     | Height | %Height             |
|---------|----------|--------|---------------|--------|---------------------|
| 11.17   | 11.13    | 11.46  | 483013681.373 | 41.20  | 129469952.900 58.69 |
| 11.78   | 11.74    | 11.94  | 61972590.099  | 5.29   | 14741384.664 6.68   |
| 12.25   | 12.19    | 12.77  | 627516143.558 | 53.52  | 76389930.968 34.63  |

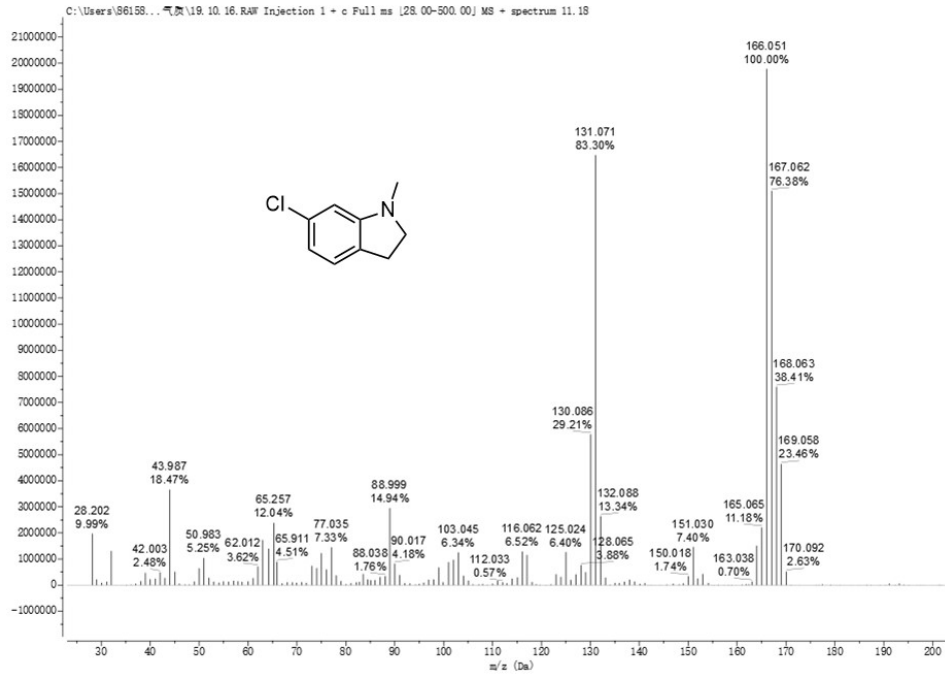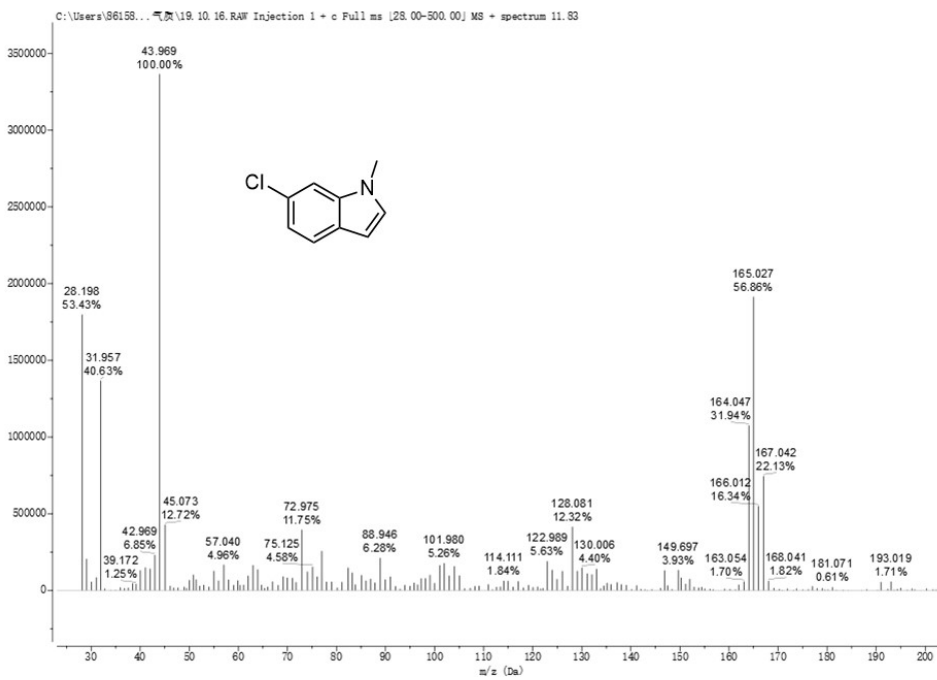

(12). GC-MS spectrum for substrate: 4-chloroindole

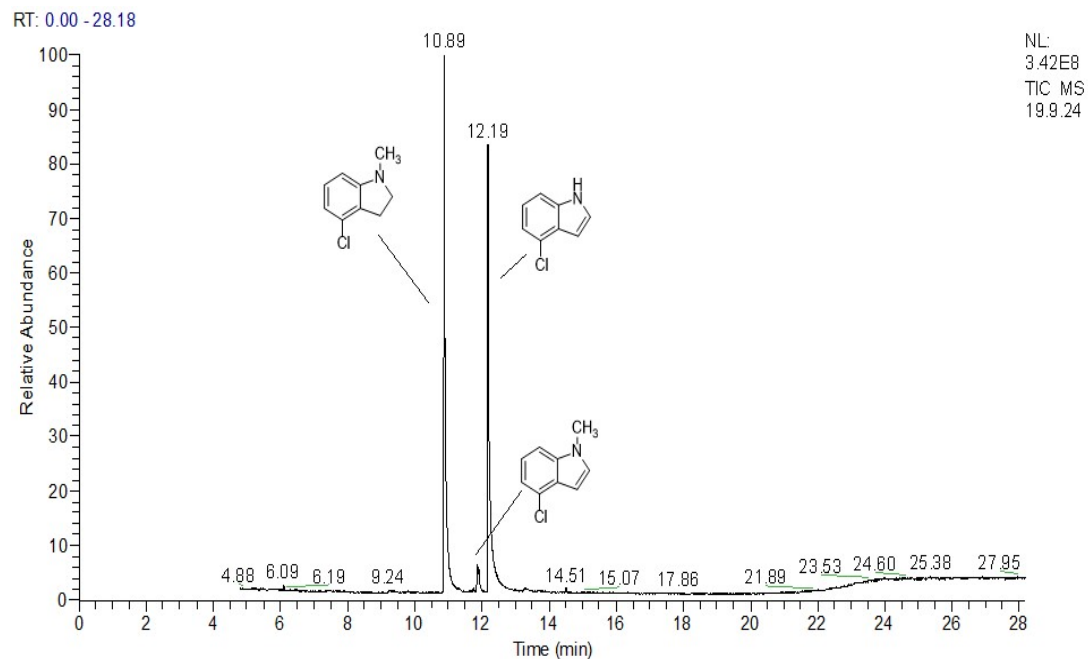

RT: 9.95 - 17.89

Number of detected peaks: 3

| Apex RT | Start RT | End RT | Area%Area      | Height | %Height             |
|---------|----------|--------|----------------|--------|---------------------|
| 10.89   | 10.87    | 11.45  | 1075763021.516 | 48.38  | 337921127.393 53.04 |
| 11.86   | 11.81    | 12.04  | 91808904.408   | 4.13   | 17724087.128 2.78   |
| 12.19   | 12.16    | 12.58  | 1056035523.616 | 47.49  | 281494268.521 44.18 |

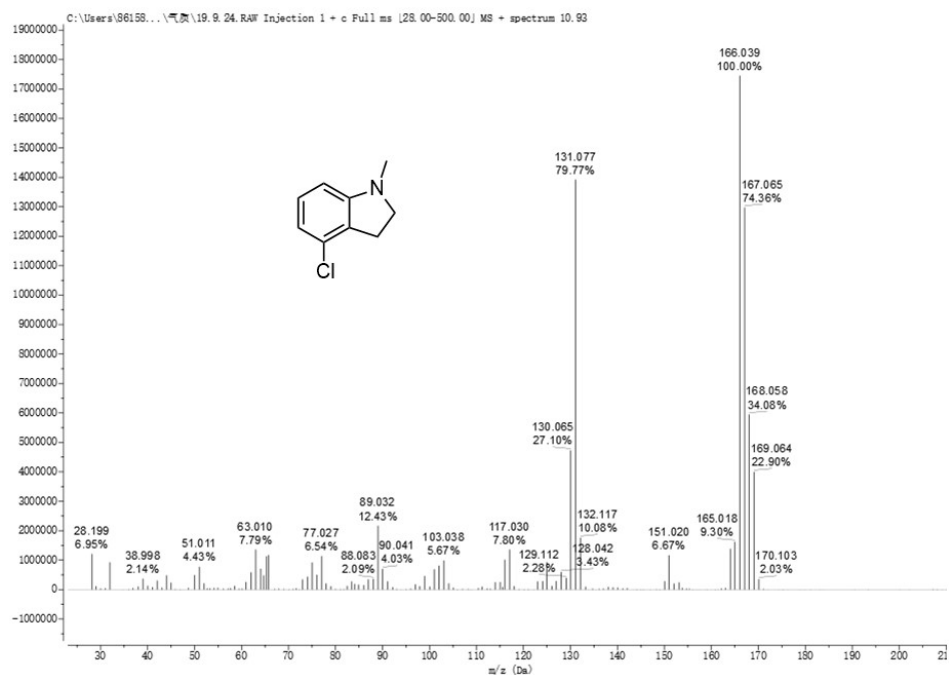

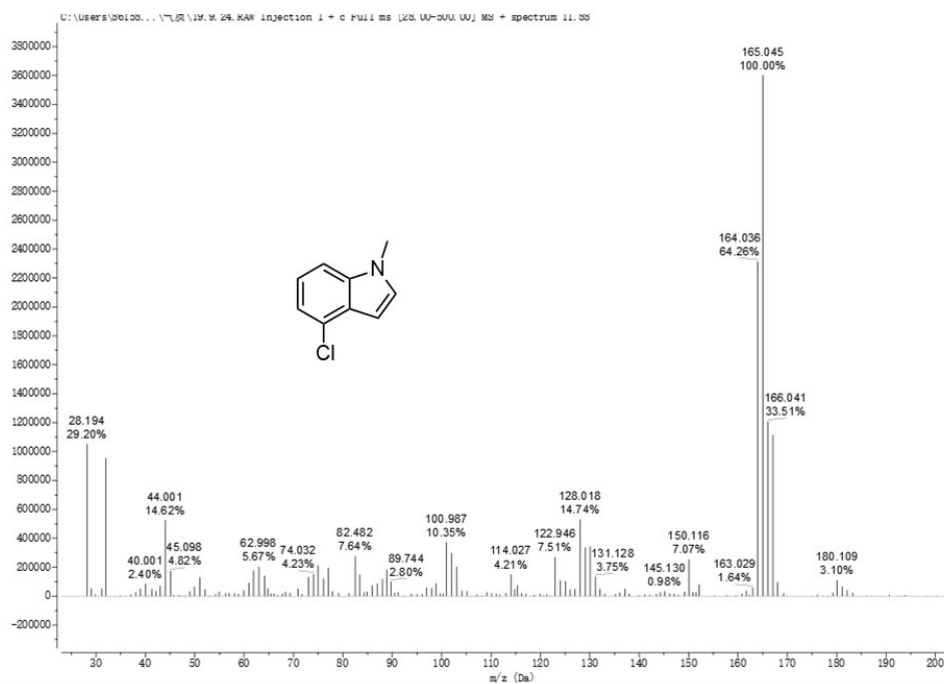

(13). GC-MS spectrum for substrate: quinoline

RT: 0.00 - 28.19

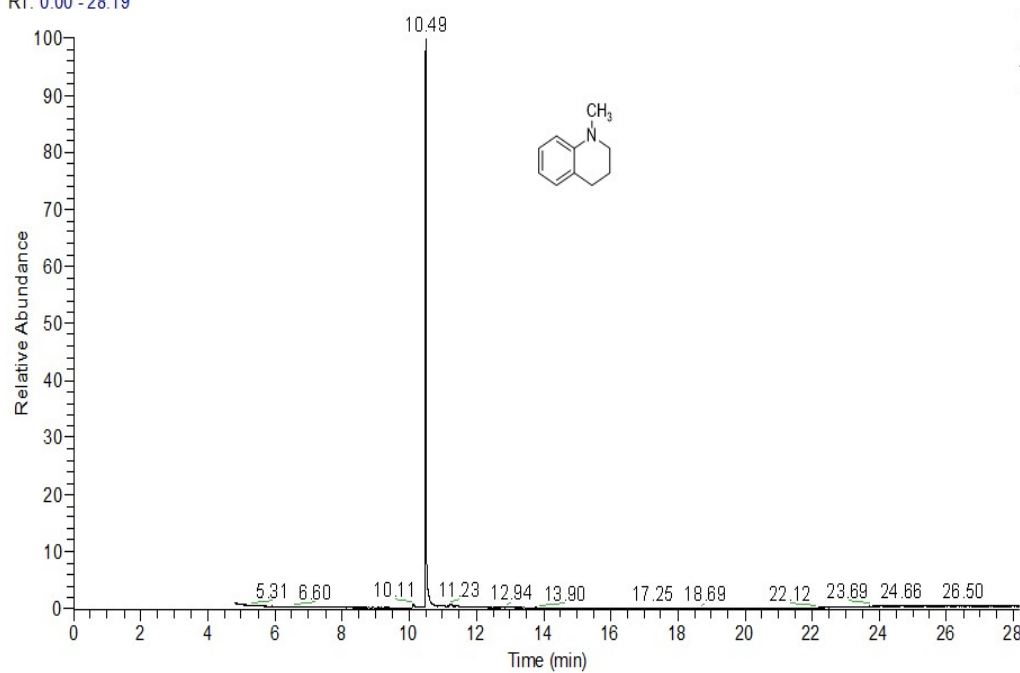

NL:  
1.48E9  
TIC MS  
19.10.31右

RT: 9.16 - 14.02

Number of detected peaks: 1

| Apex RT | Start RT | End RT | Area%Area      | Height | %Height               |
|---------|----------|--------|----------------|--------|-----------------------|
| 10.49   | 10.45    | 10.64  | 2288795699.069 | 100.00 | 1479789668.000 100.00 |

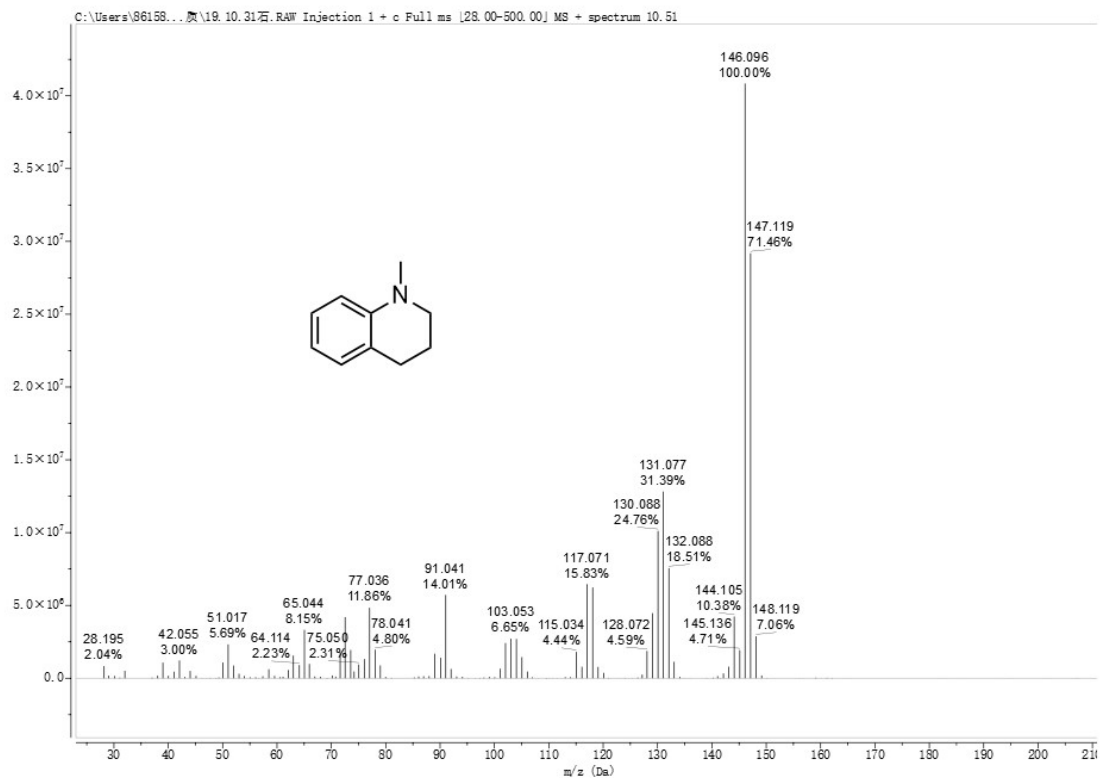

(14). GC-MS spectrum for substrate: 8-methylquinoline

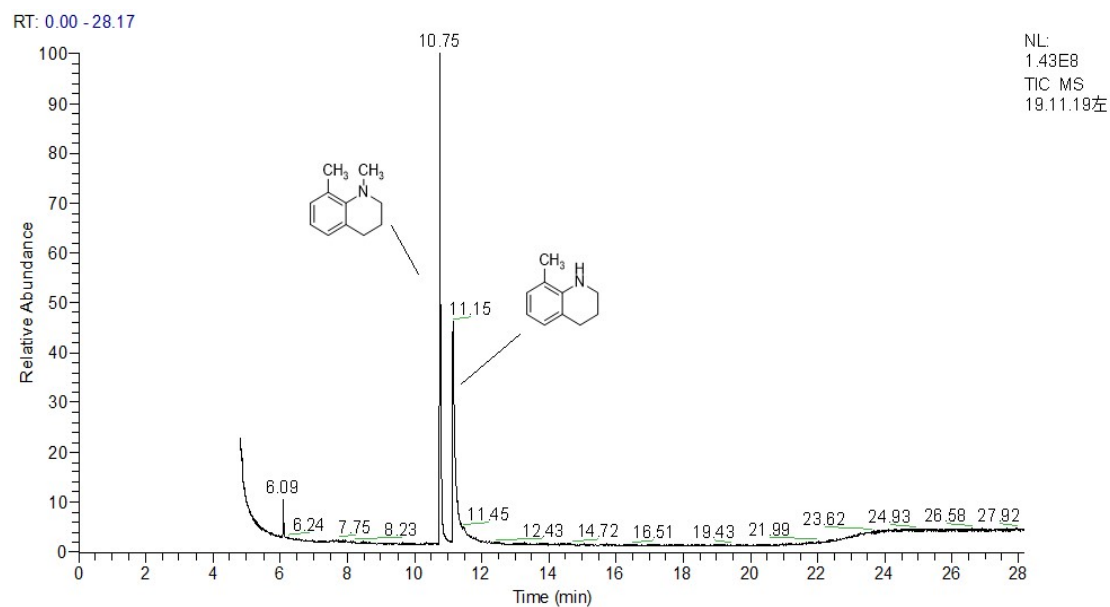

RT: 9.16 - 14.29

Number of detected peaks: 2

| Apex RT | Start RT | End RT | Area%Area     | Height | %Height             |
|---------|----------|--------|---------------|--------|---------------------|
| 10.75   | 10.72    | 10.94  | 335596677.281 | 45.42  | 141619240.733 68.21 |
| 11.15   | 11.12    | 11.65  | 403251059.347 | 54.58  | 66000258.247 31.79  |

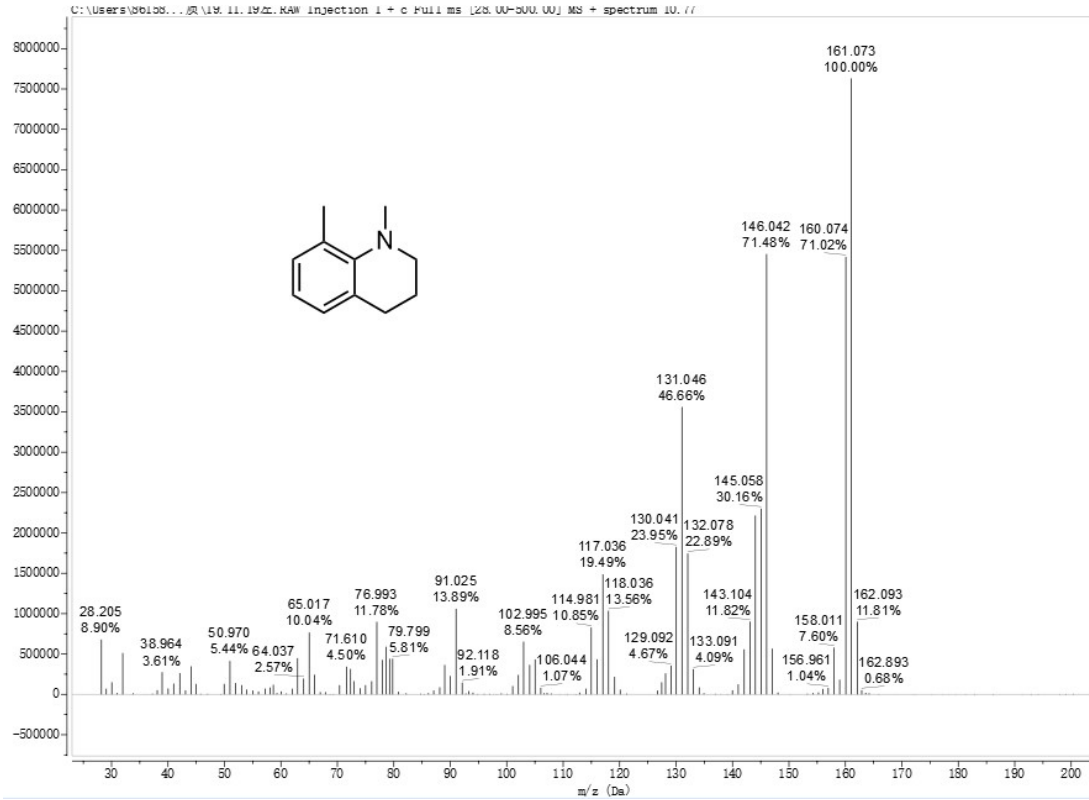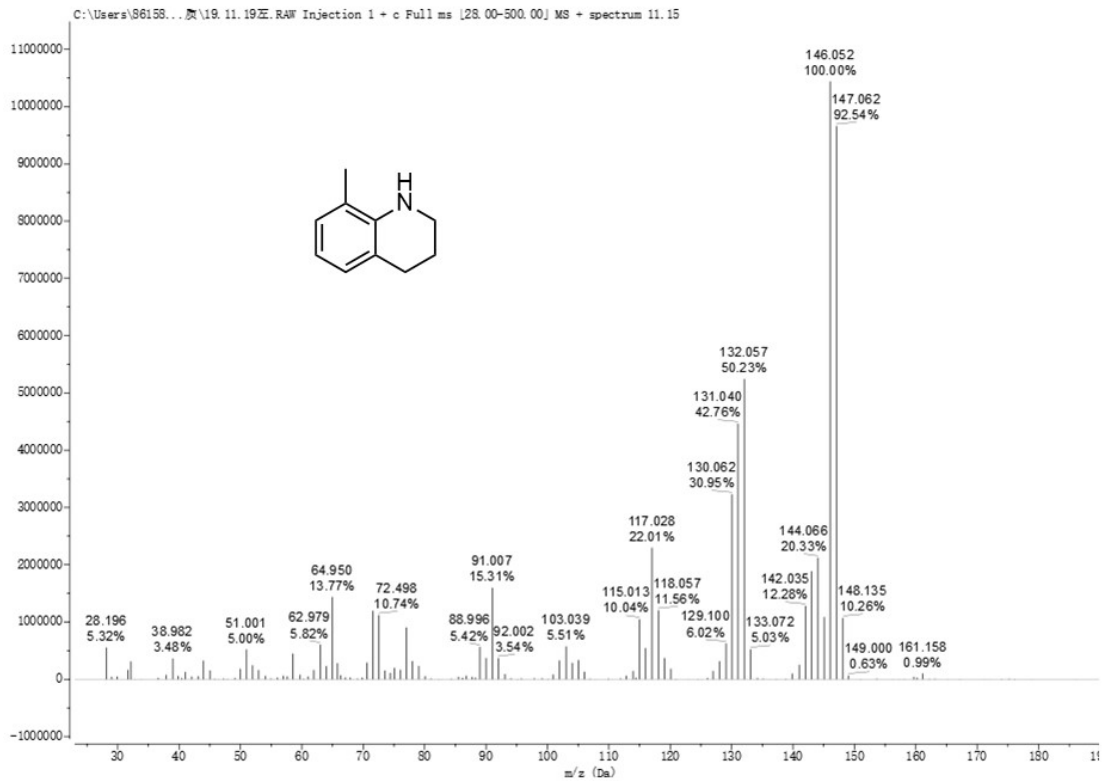

(15). GC-MS spectrum for substrate: 7-methylquinoline

RT: 0.00 - 28.18

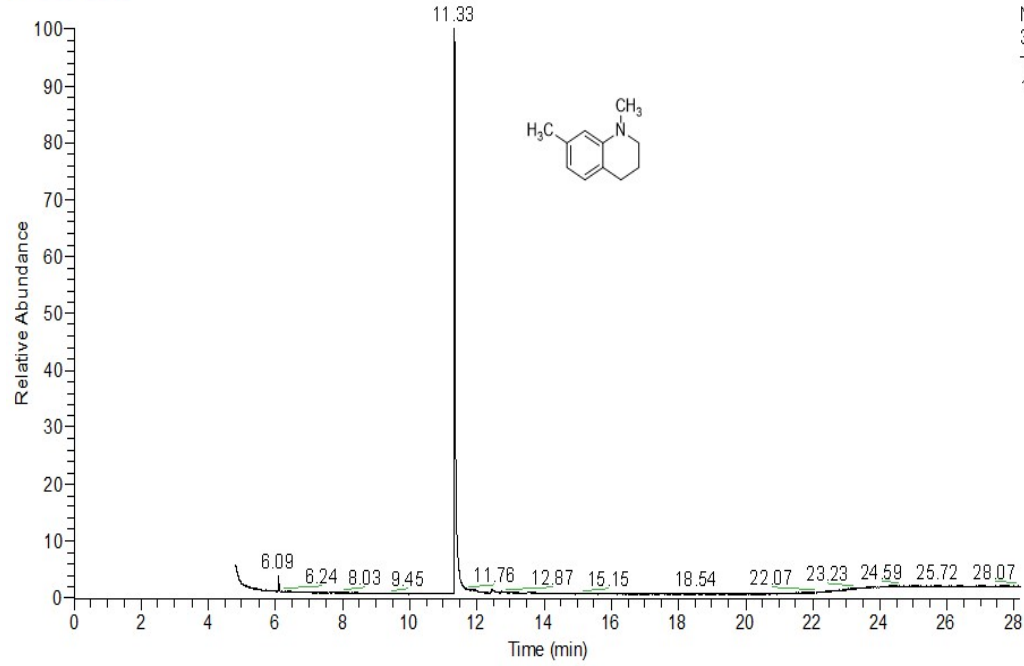

NL:  
3.41E8  
TIC MS  
19.11.16右

RT: 9.95 - 13.65

Number of detected peaks: 1

Apex RT Start RT End RT Area%Area Height %Height

|       |       |       |               |        |               |        |
|-------|-------|-------|---------------|--------|---------------|--------|
| 11.33 | 11.29 | 11.66 | 856889489.247 | 100.00 | 341153616.857 | 100.00 |
|-------|-------|-------|---------------|--------|---------------|--------|

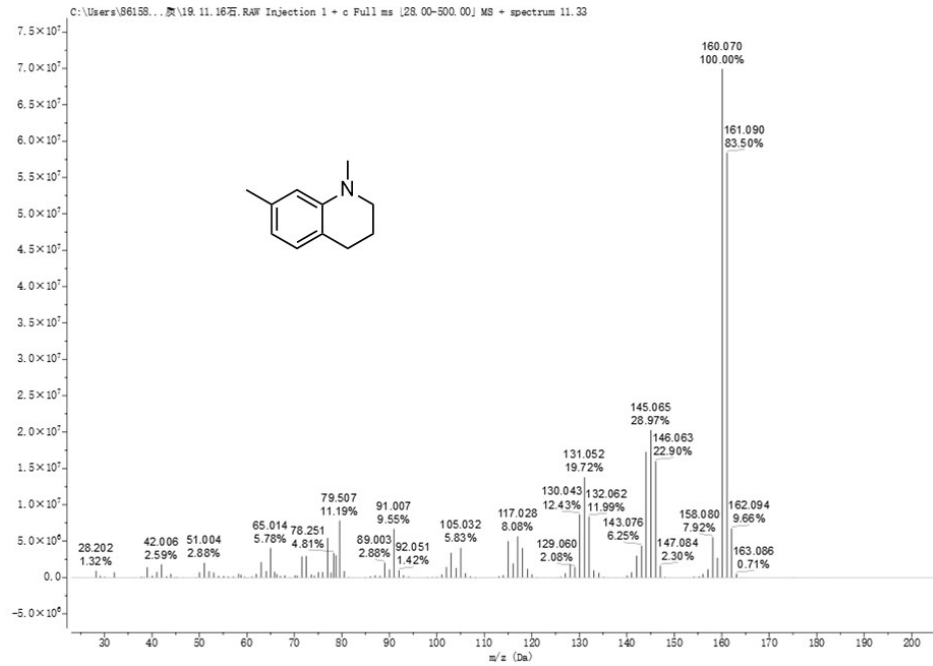

(16). GC-MS spectrum for substrate: 6-methylquinoline

RT: 0.00 - 28.18

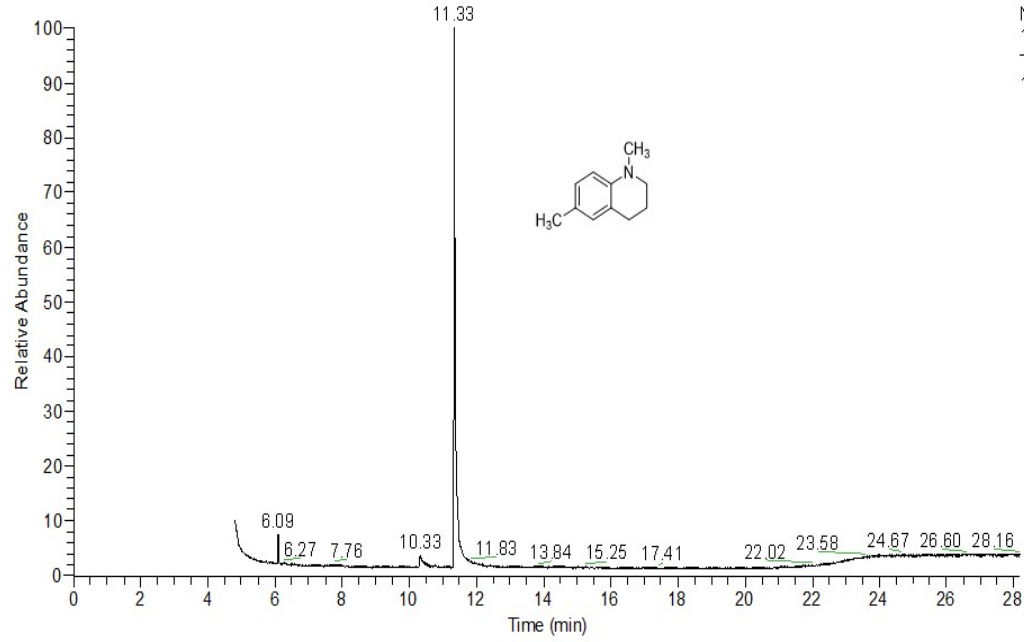

NL:  
1.87E8  
TIC MS  
19.11.16左

RT: 8.44 - 14.69

Number of detected peaks: 1

Apex RT Start RT End RT Area%Area Height %Height

| Apex RT | Start RT | End RT | Area%Area     | Height | %Height              |
|---------|----------|--------|---------------|--------|----------------------|
| 11.33   | 11.31    | 11.74  | 588875935.300 | 100.00 | 184578043.670 100.00 |

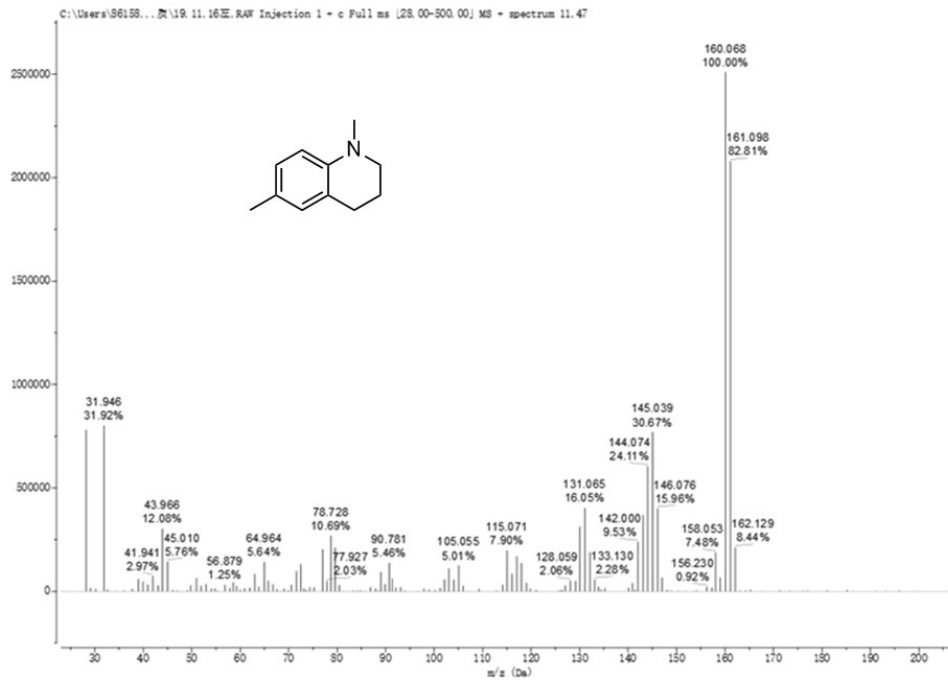



(17). GC-MS spectrum for substrate: 5-methylquinoline

RT: 0.00 - 28.20

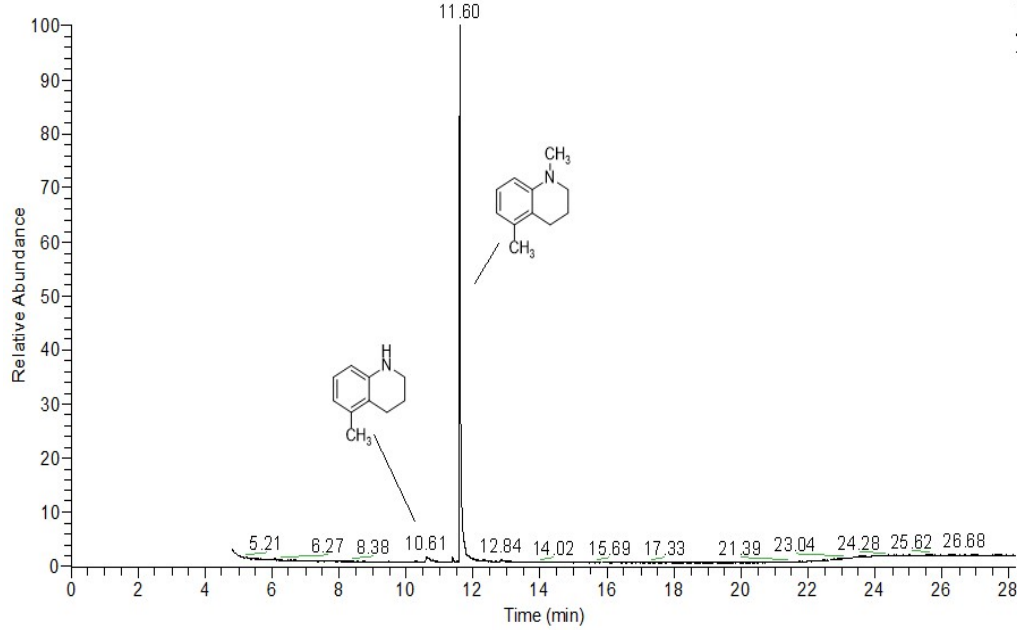

NL:  
4.10E8  
TIC MS  
19.11.6右

RT: 10.44 - 12.29

Number of detected peaks: 2

| Apex RT | Start RT | End RT | Area%Area     | Height | %Height             |
|---------|----------|--------|---------------|--------|---------------------|
| 10.61   | 10.58    | 10.74  | 26827636.170  | 2.90   | 5359287.199 1.30    |
| 11.60   | 11.57    | 11.92  | 898771453.218 | 97.10  | 407492529.627 98.70 |

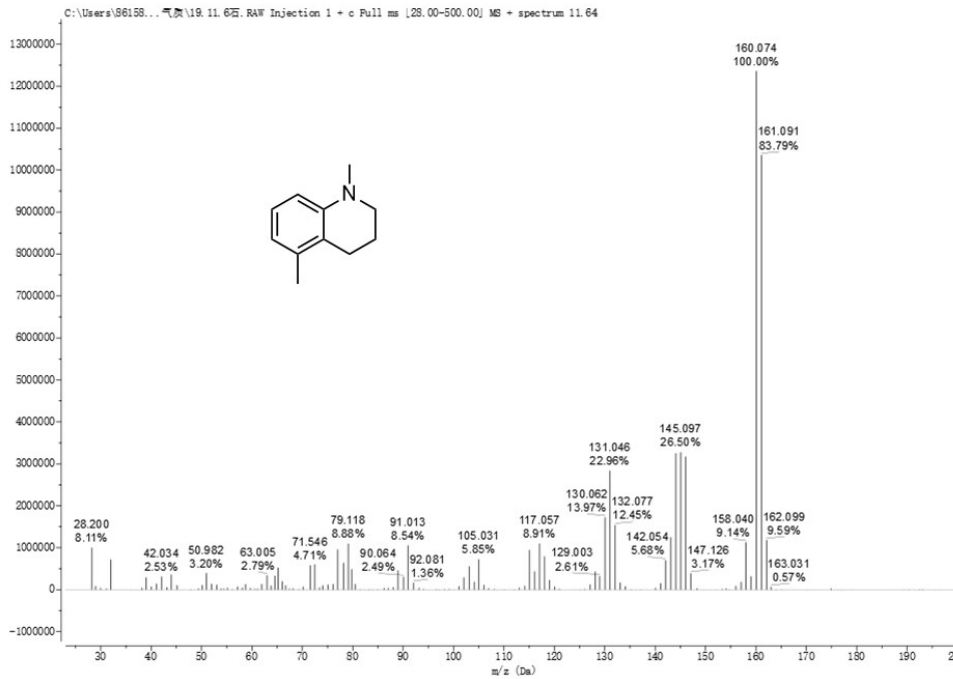

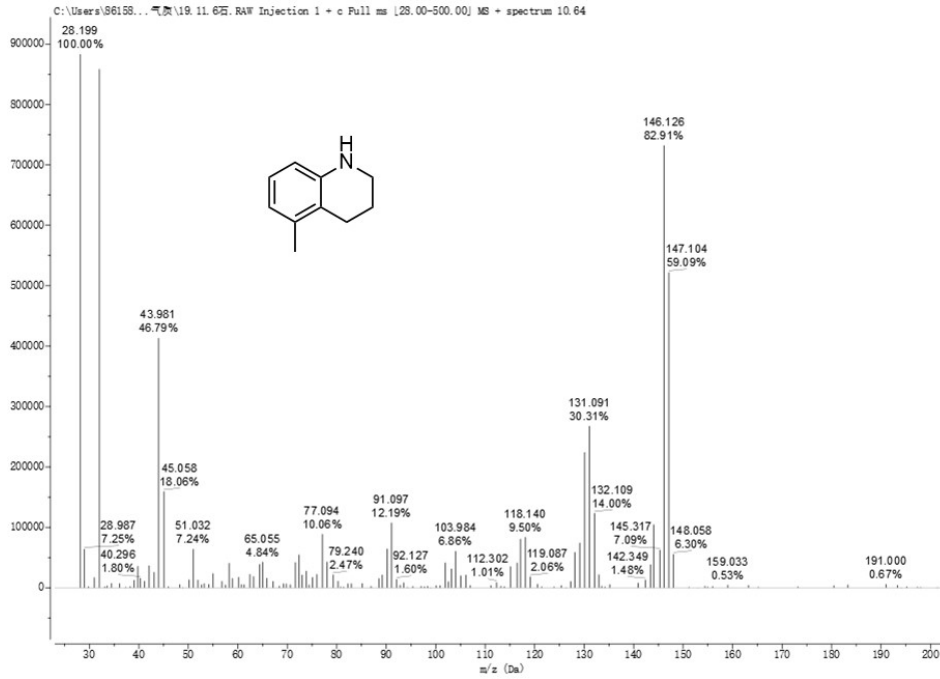

(18). GC-MS spectrum for substrate: 6-methoxyquinoline

RT: 0.00 - 28.19

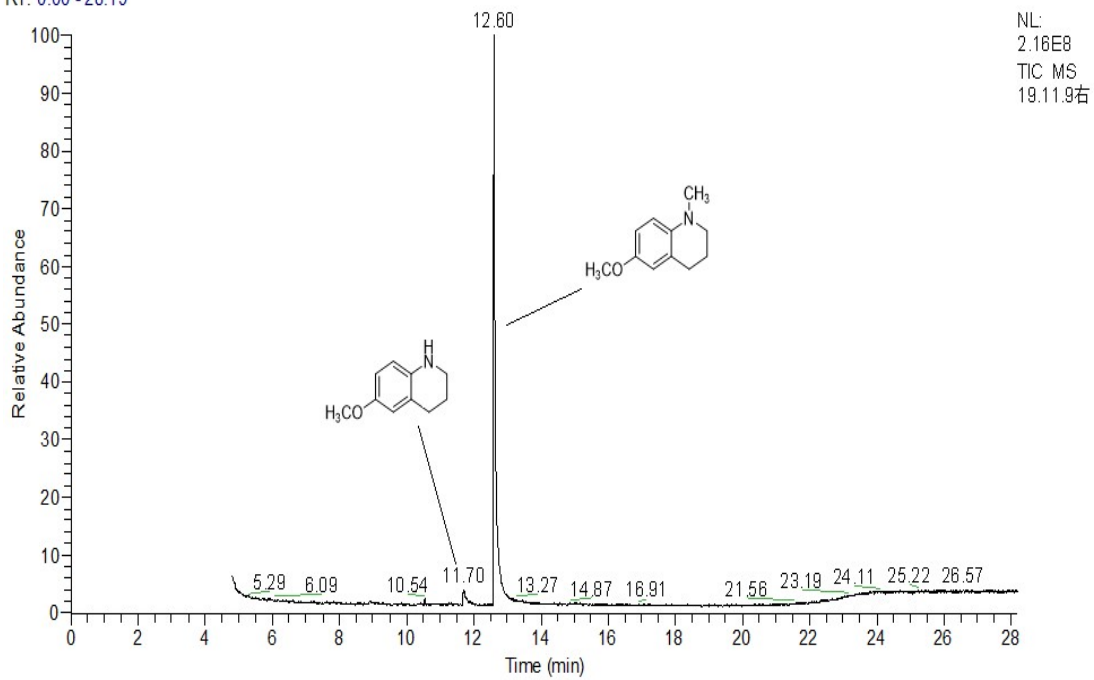

RT: 8.83 - 15.25

Number of detected peaks: 2

| Apex RT | Start RT | End RT | Area%Area     | Height | %Height       |       |
|---------|----------|--------|---------------|--------|---------------|-------|
| 11.70   | 11.67    | 11.85  | 41830734.869  | 4.98   | 7926326.542   | 3.54  |
| 12.60   | 12.57    | 13.12  | 797333200.033 | 95.02  | 216047635.372 | 96.46 |

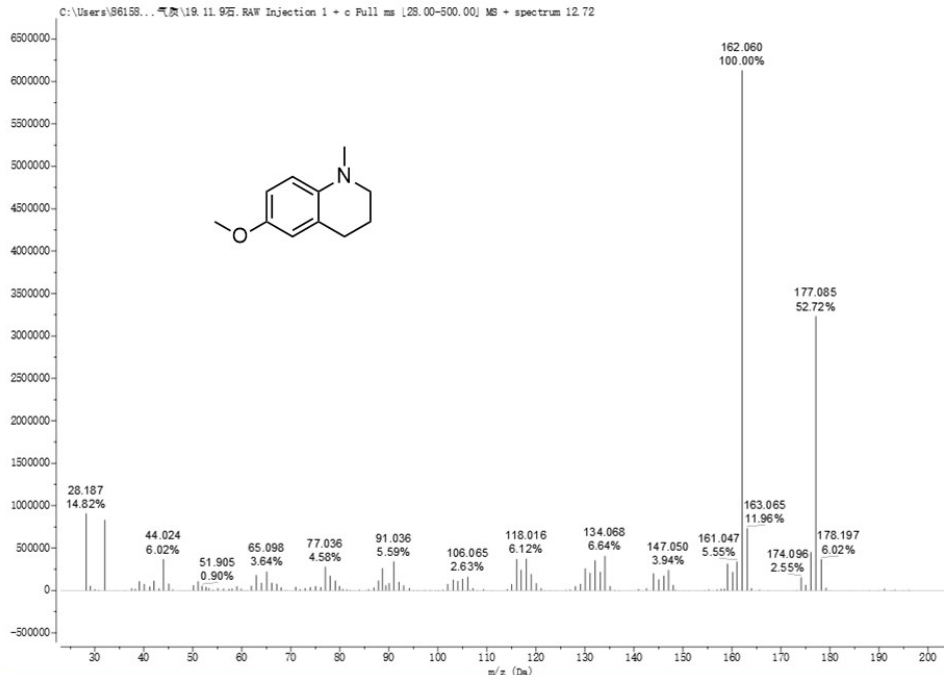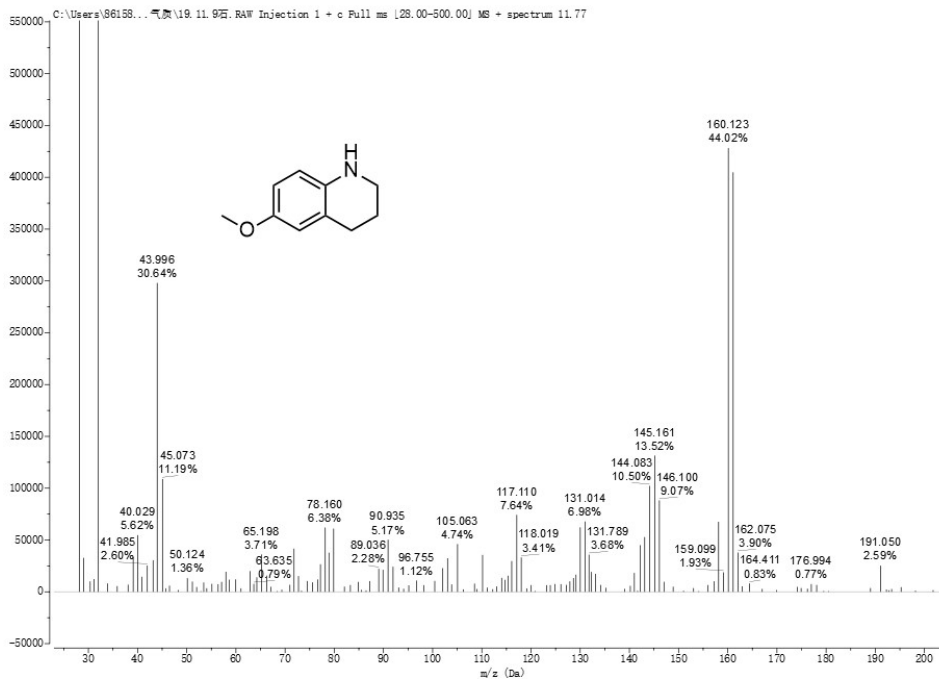

(19). GC-MS spectrum for substrate: 5-methoxyquinoline

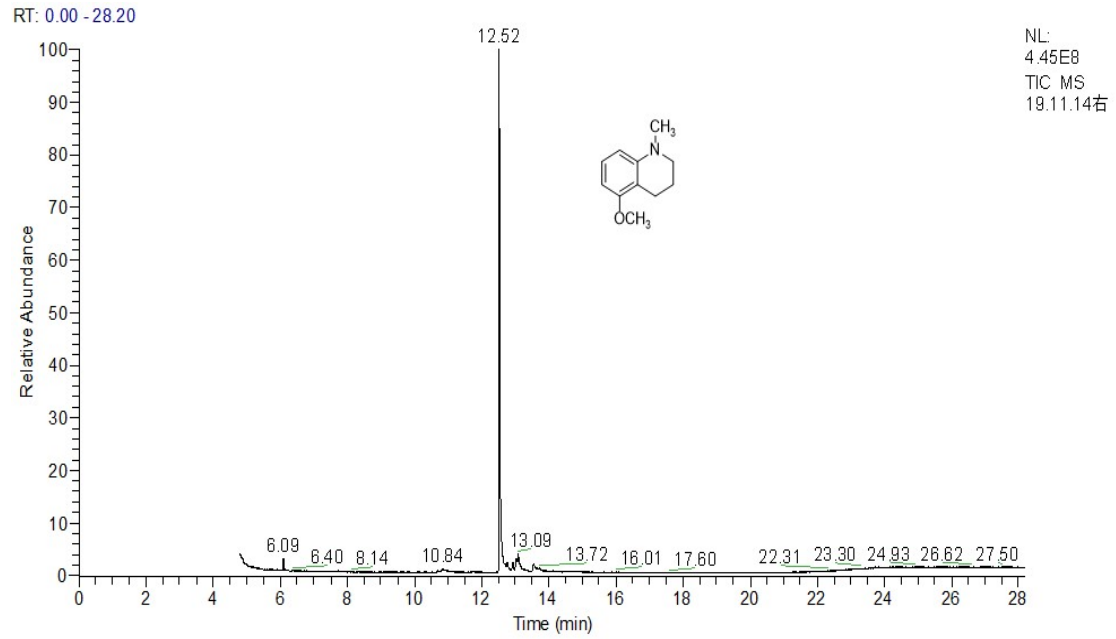

RT: 11.20 - 16.60

Number of detected peaks: 1

| Apex RT | Start RT | End RT | Area%Area     | Height | %Height              |
|---------|----------|--------|---------------|--------|----------------------|
| 12.52   | 12.49    | 12.69  | 842698490.551 | 100.00 | 443040267.037 100.00 |

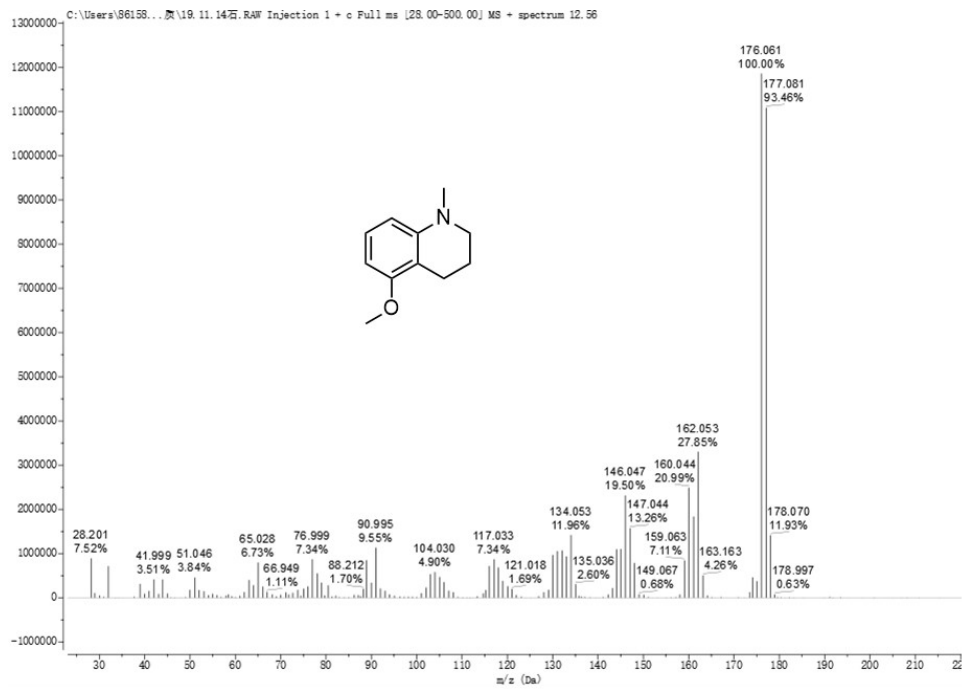

(20). GC-MS spectrum for substrate: 8-fluoroquinoline

RT: 0.00 - 28.18

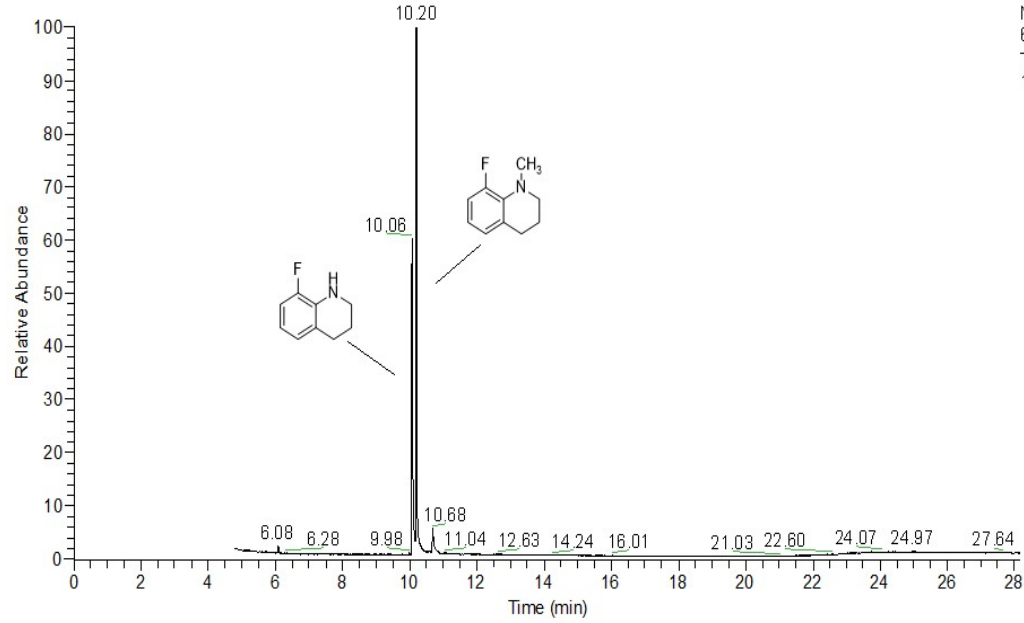

NL:  
6.90E8  
TIC MS  
19.11.14左

RT: 9.73 - 11.28

Number of detected peaks: 2

| Apex RT | Start RT | End RT | Area%Area      | Height | %Height             |
|---------|----------|--------|----------------|--------|---------------------|
| 10.06   | 10.03    | 10.16  | 733392634.781  | 38.42  | 411121976.842 37.50 |
| 10.20   | 10.17    | 10.41  | 1175347995.005 | 61.58  | 685241265.698 62.50 |

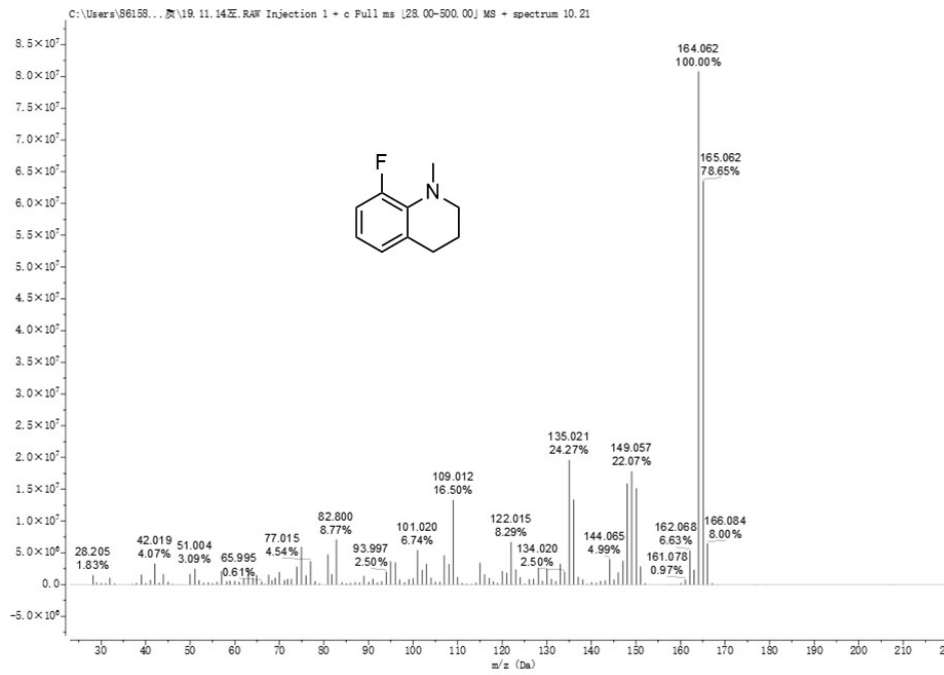

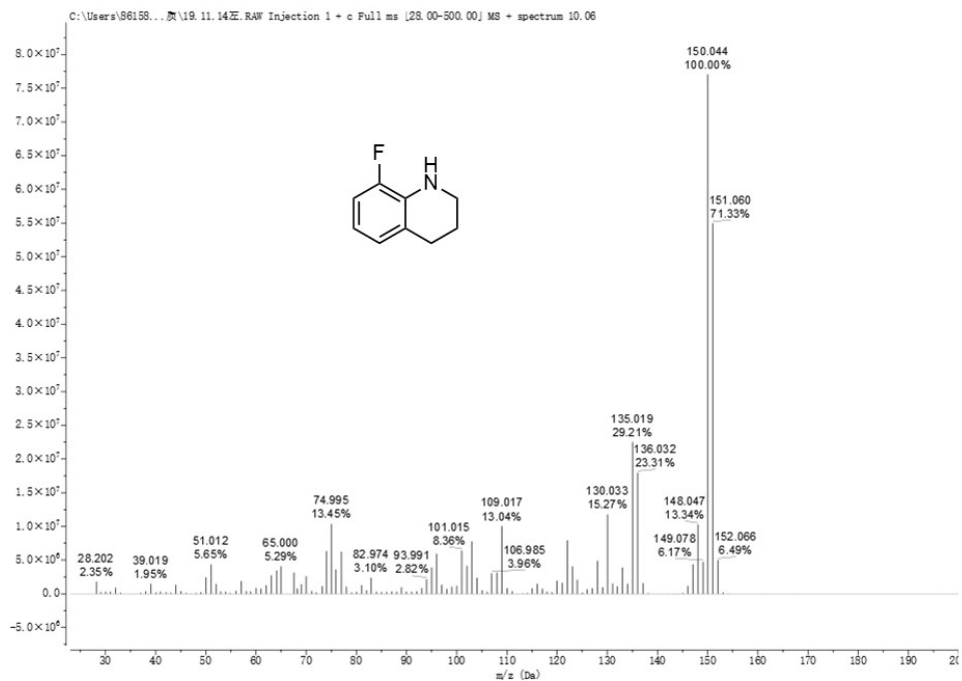

(21). GC-MS spectrum for substrate: 6-fluoroquinoline

RT: 0.00 - 28.20

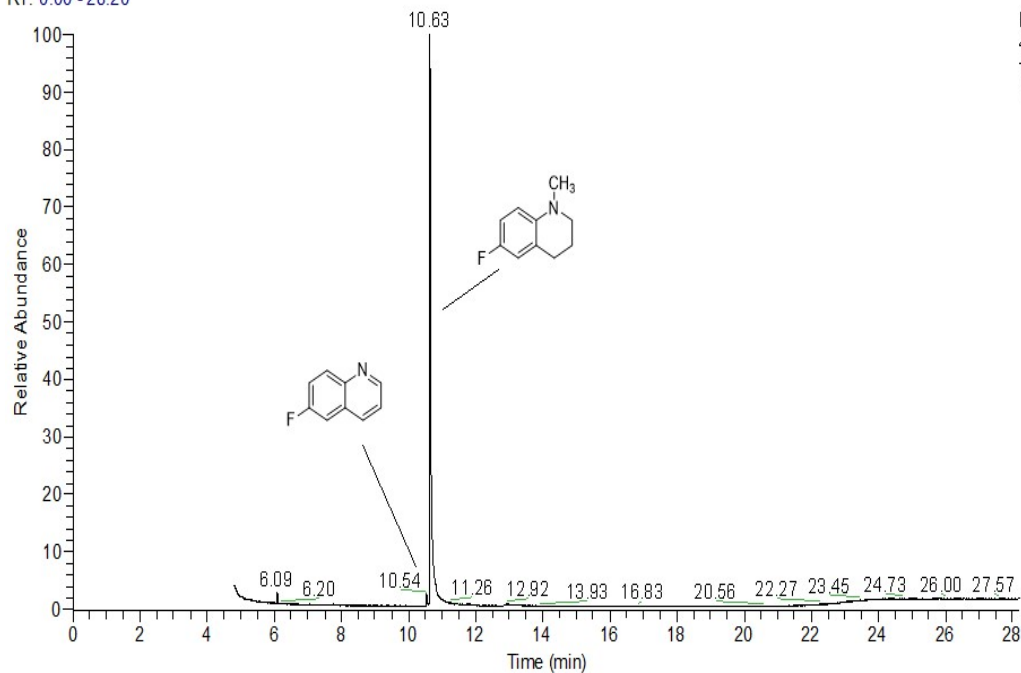

NL:  
4.12E8  
TIC MS  
19.11.11右

RT: 8.95 - 15.44

Number of detected peaks: 2

| Apex RT | Start RT | End RT | Area%Area      | Height | %Height             |
|---------|----------|--------|----------------|--------|---------------------|
| 10.54   | 10.51    | 10.59  | 24446000.720   | 2.16   | 10054728.511 2.39   |
| 10.63   | 10.62    | 11.14  | 1107132951.556 | 97.84  | 410433857.654 97.61 |

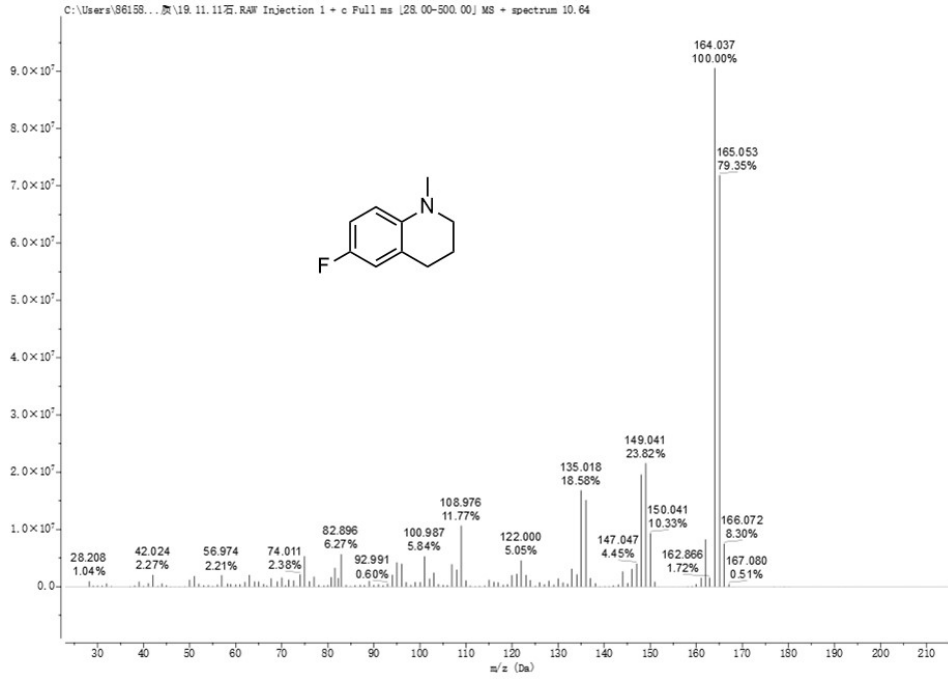

(22). GC-MS spectrum for Scheme 4

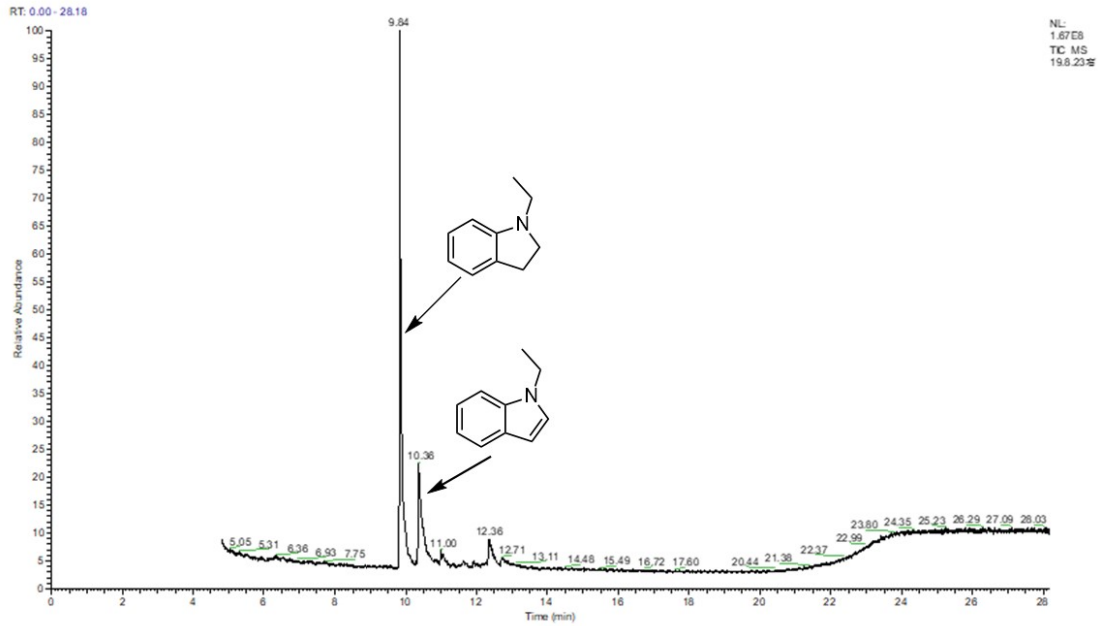

RT: 7.32 - 14.33

Number of detected peaks: 2

| Apex RT | Start RT | End RT | Area%Area     | Height | %Height             |
|---------|----------|--------|---------------|--------|---------------------|
| 9.84    | 9.79     | 10.26  | 565441844.181 | 71.00  | 160353423.235 84.40 |
| 10.36   | 10.34    | 10.78  | 230925790.529 | 29.00  | 29648065.246 15.60  |

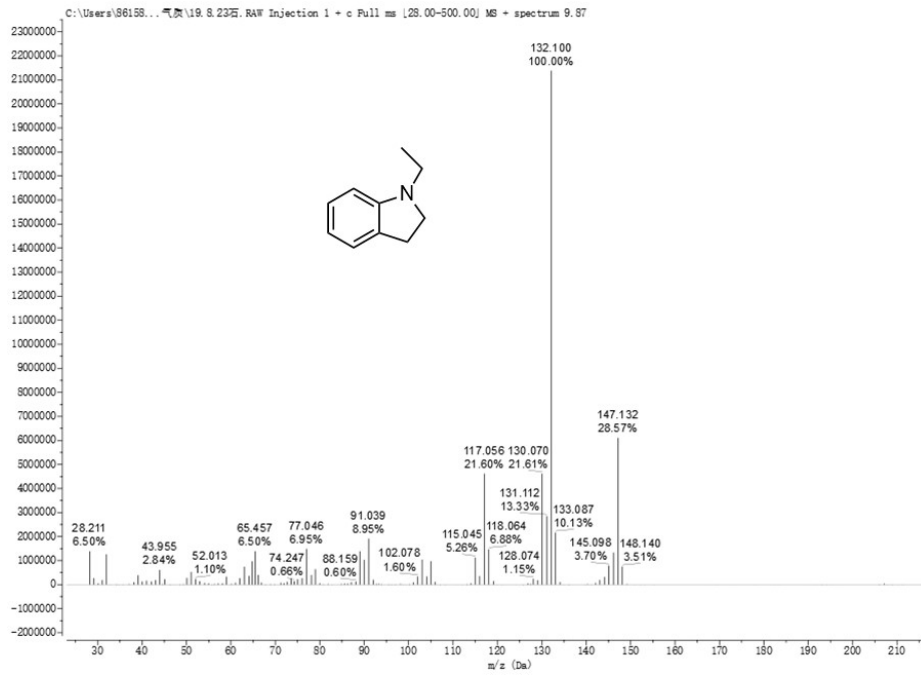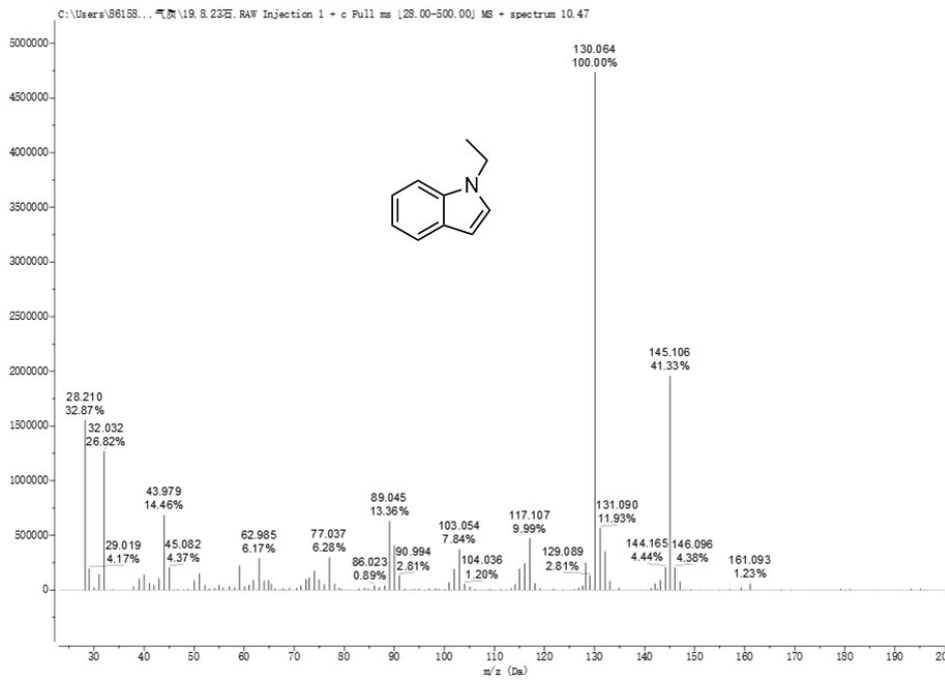



All the  $^1\text{H}$  NMR and  $^{13}\text{C}$  NMR spectra and data of the products were shown as follow:

(23)  $^1\text{H}$  NMR and  $^{13}\text{C}$  NMR spectrum for N-methylindoline

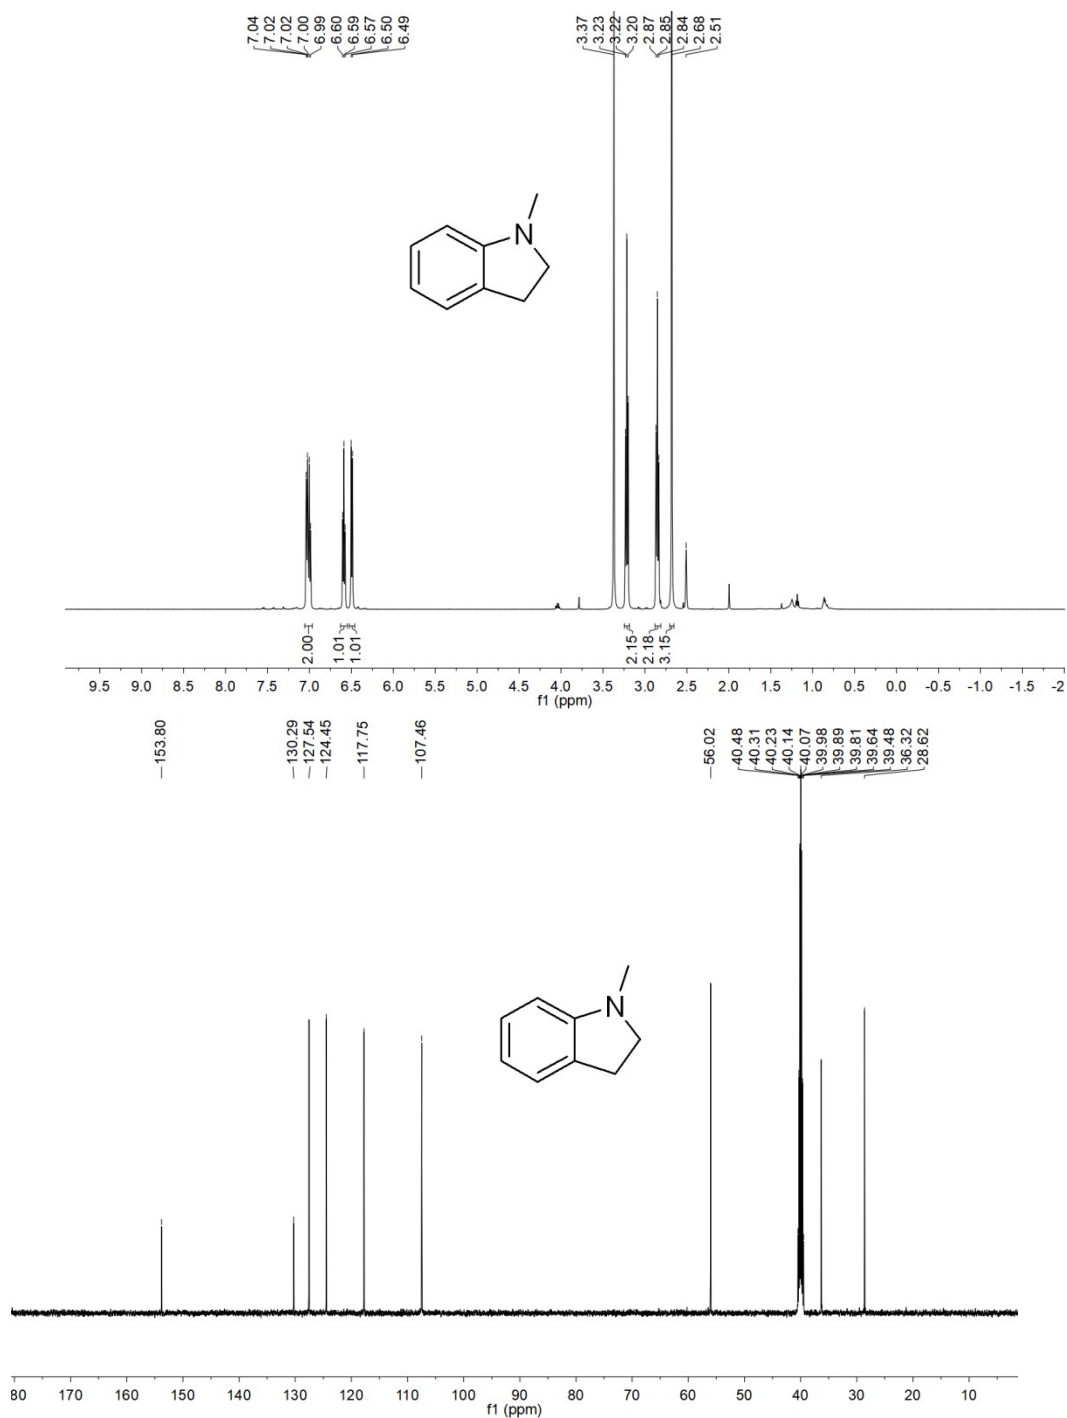

(24) <sup>1</sup>H NMR and <sup>13</sup>C NMR spectrum for N-methylindole

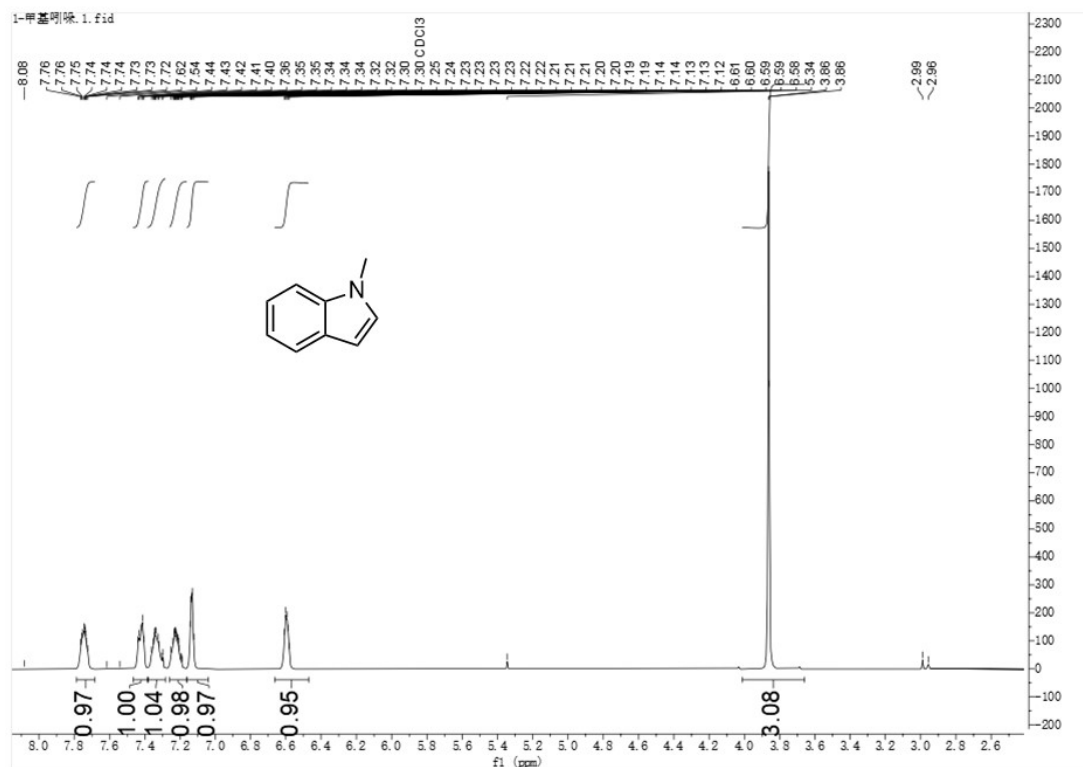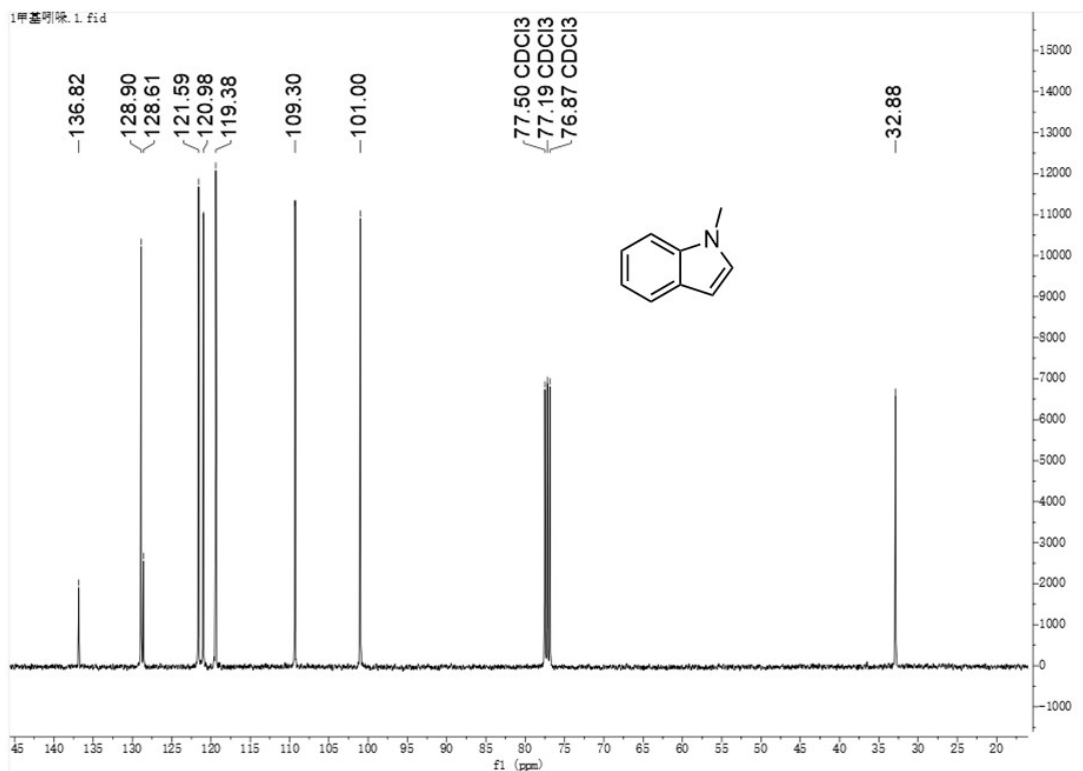

(25)  $^1\text{H}$  NMR and  $^{13}\text{C}$  NMR spectrum for indoline

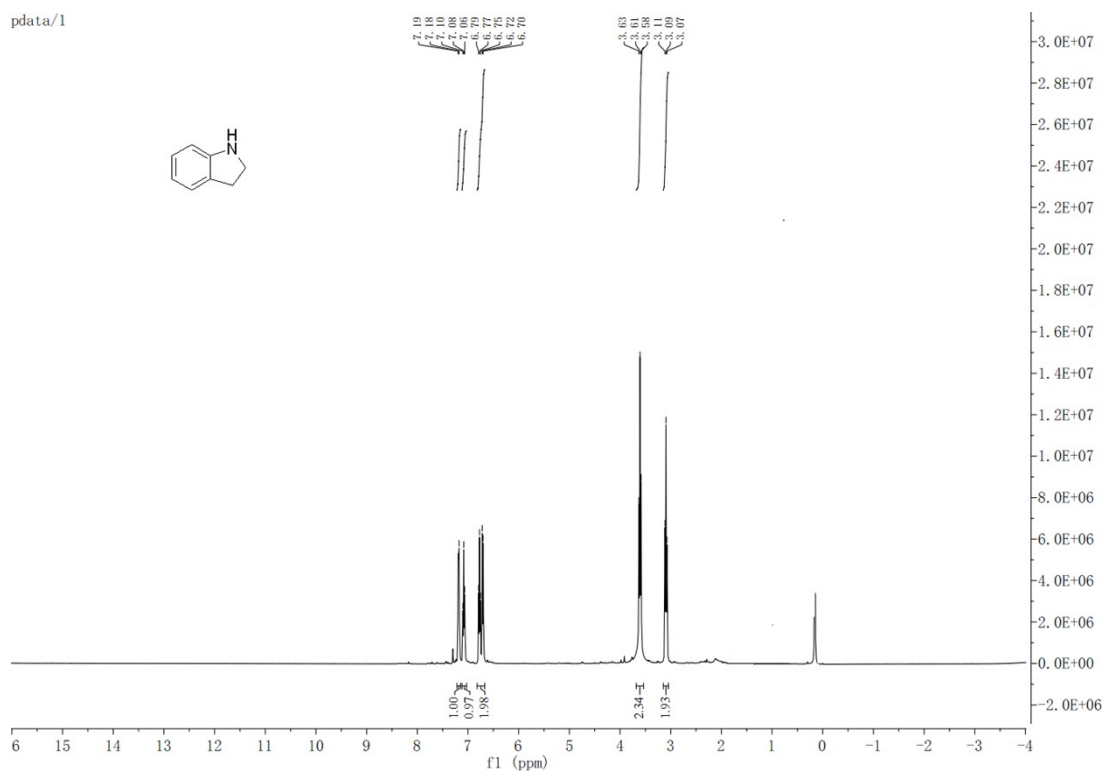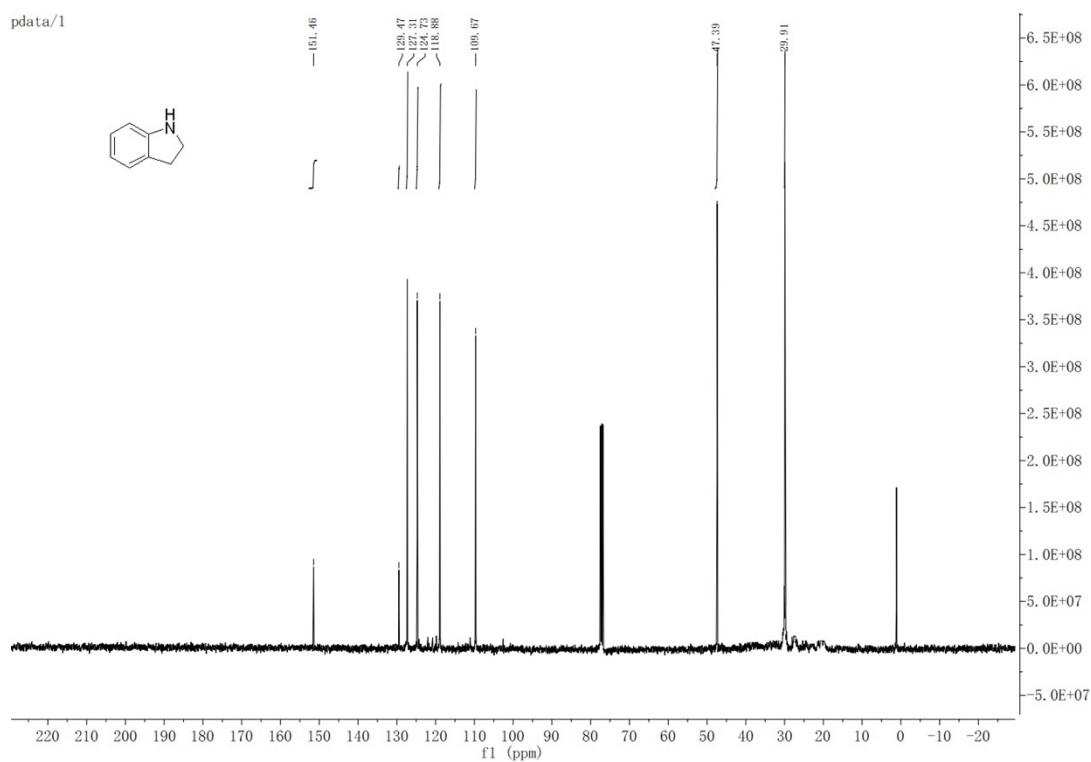

(26)  $^1\text{H}$  NMR spectrum for 1,6-dimethylindoline

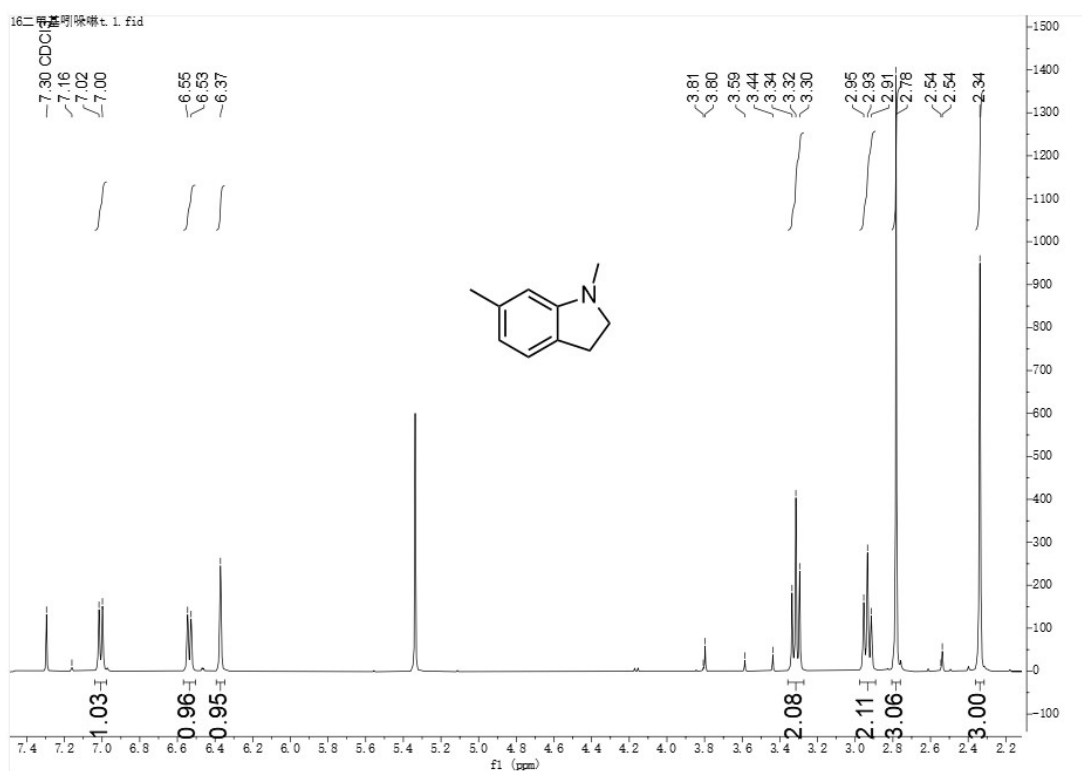

(27)  $^1\text{H}$  NMR spectrum for 1,5-dimethylindoline

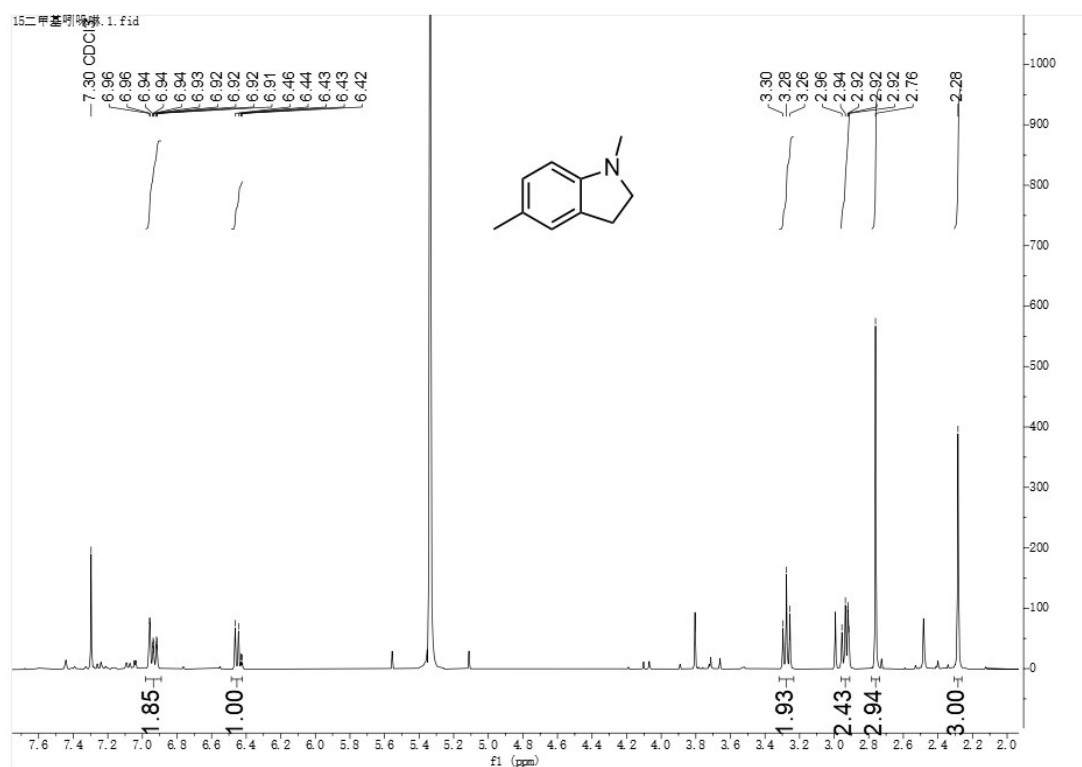

(28)  $^1\text{H}$  NMR spectrum for 1,4-dimethylindoline

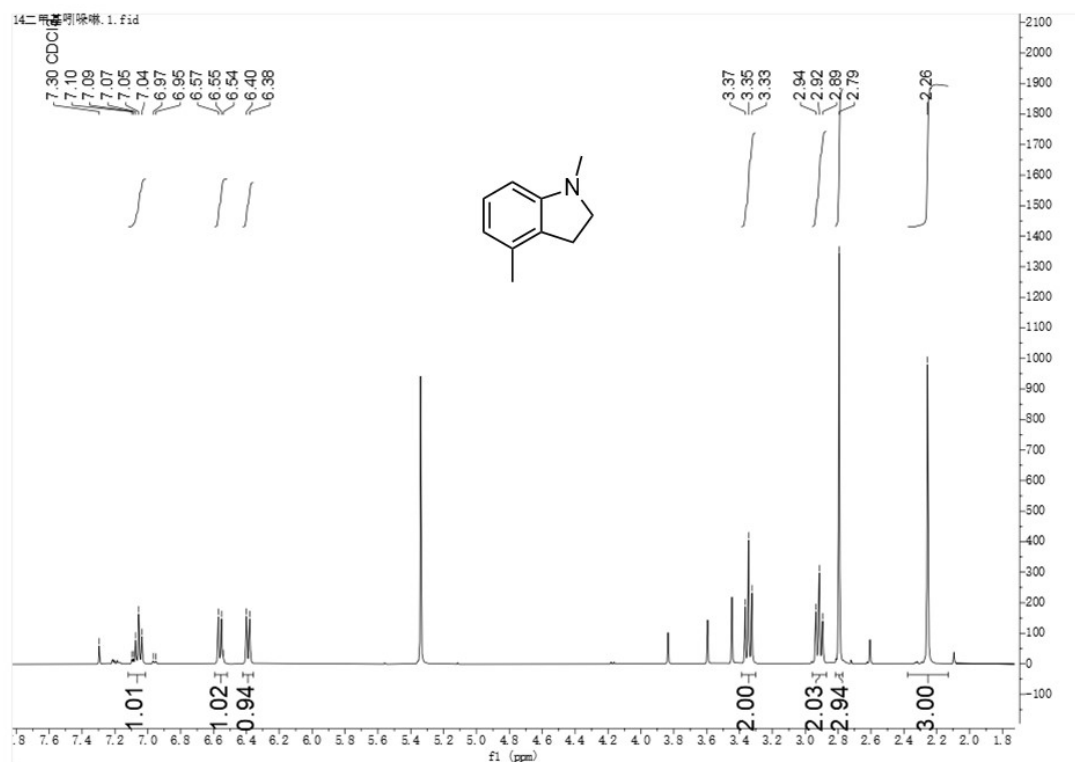

(29)  $^1\text{H}$  NMR spectrum for 1-Methyl-6-methoxy-indolin

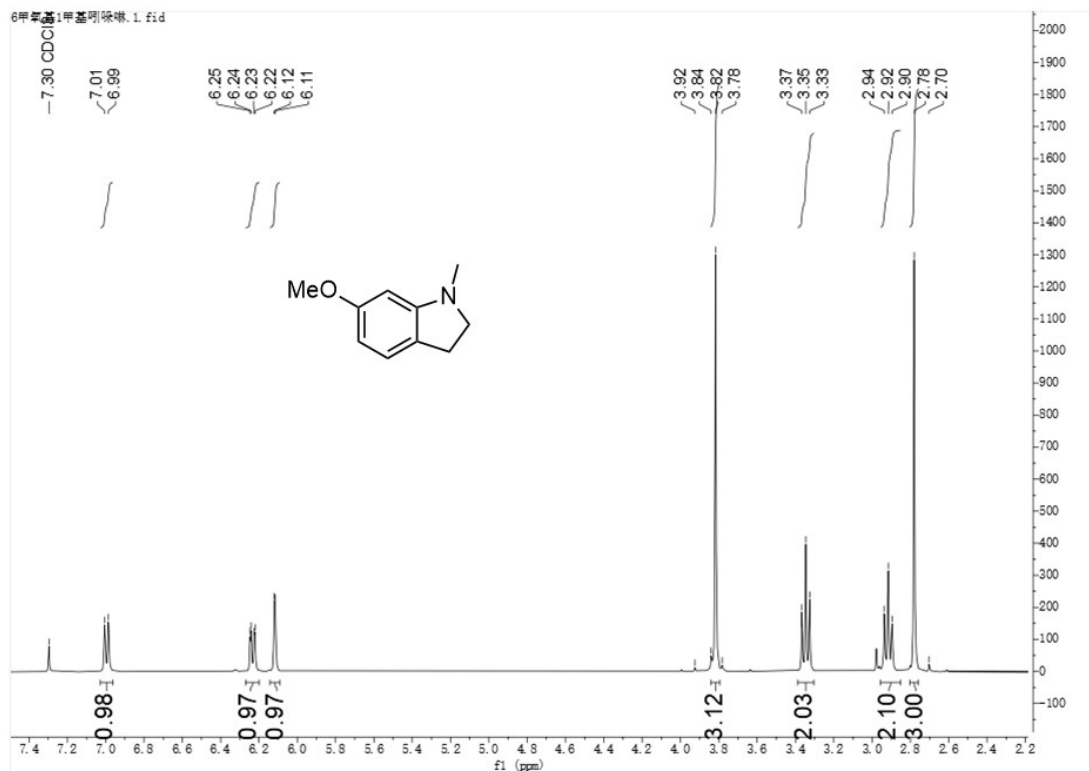

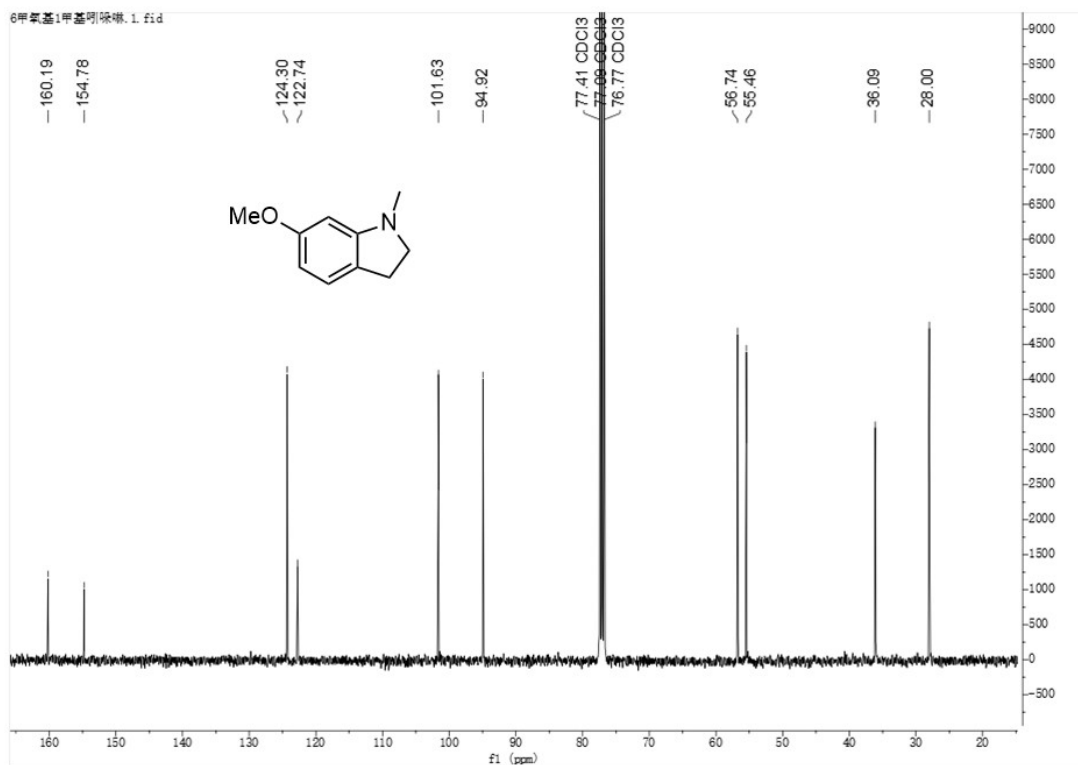

(30) <sup>1</sup>H NMR spectrum for 1-Methyl-5-methoxy-indolin

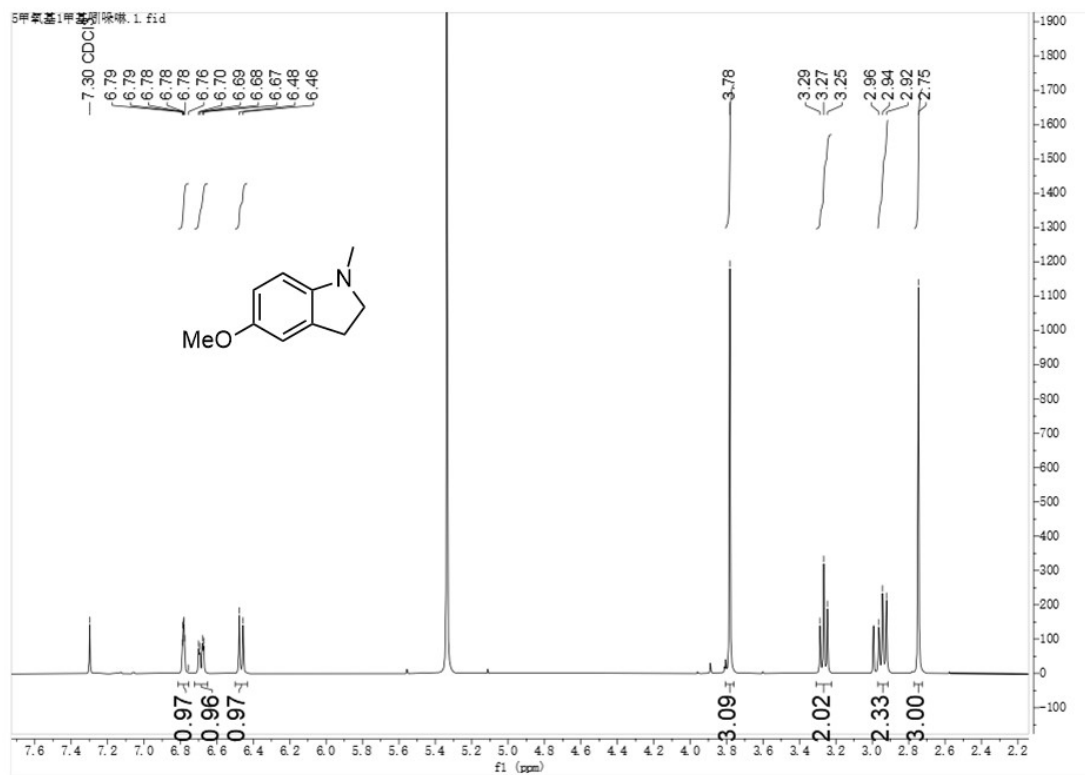

(31)  $^1\text{H}$  NMR and  $^{13}\text{C}$  NMR spectrum for 1-Methyl-4-methoxy-indolin

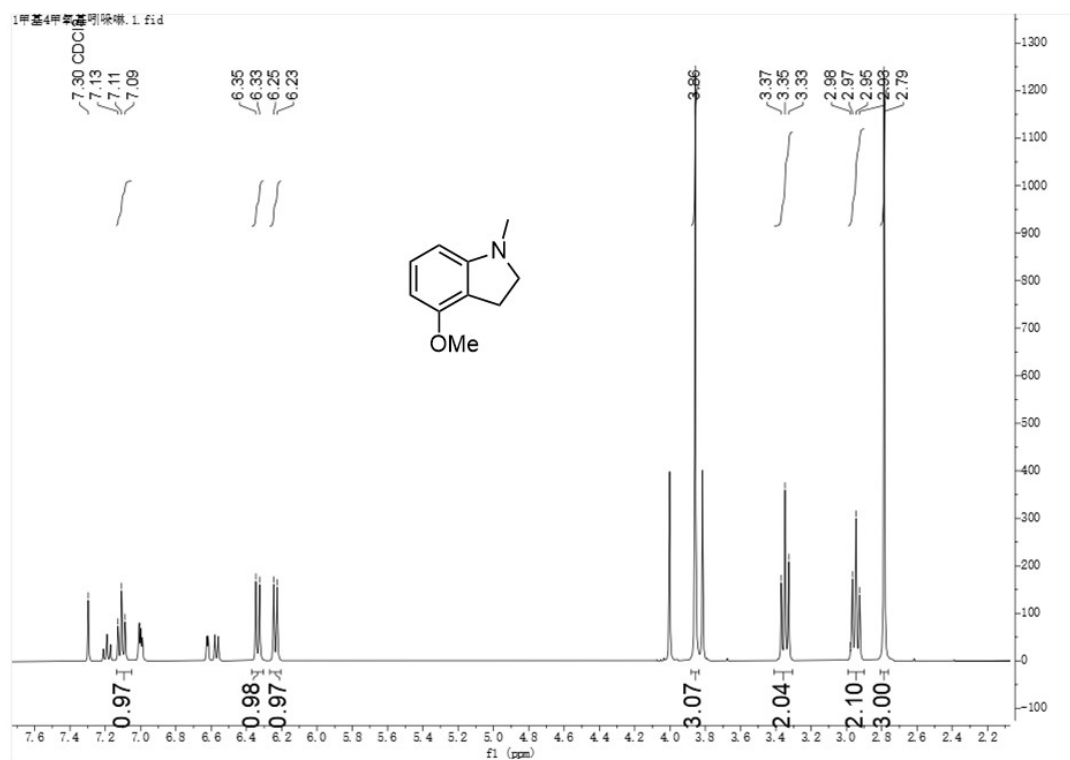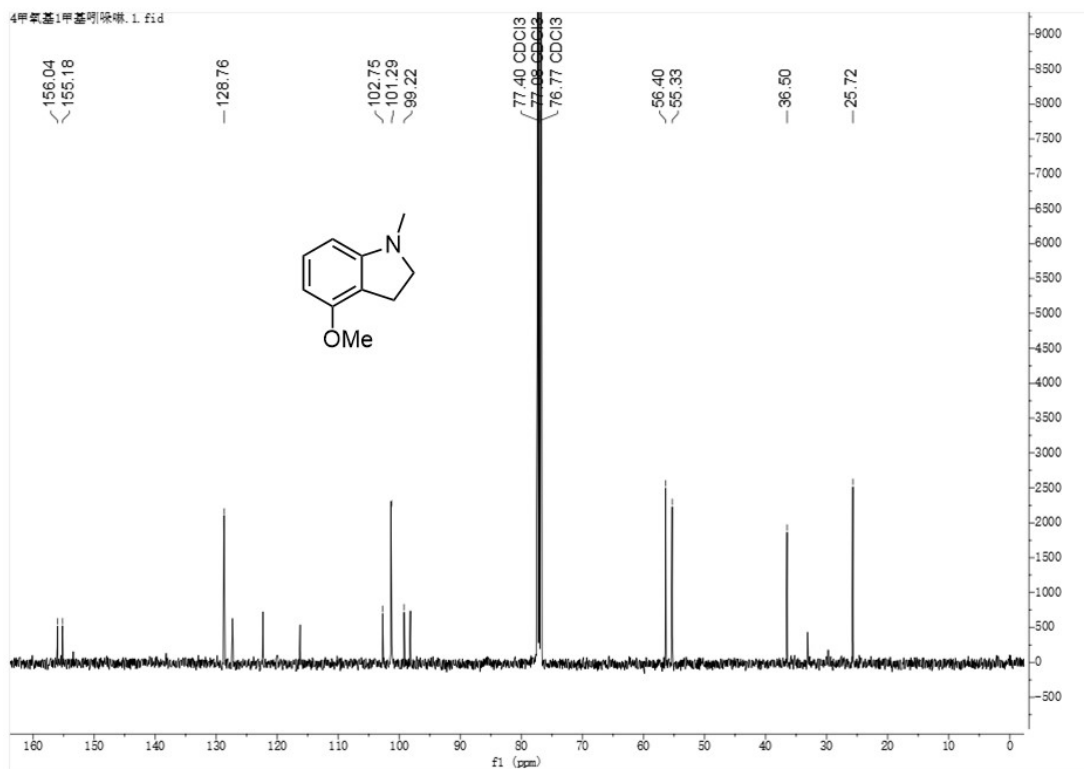

(32)  $^1\text{H}$  NMR spectrum for 6-fluoro-1-methylindoline

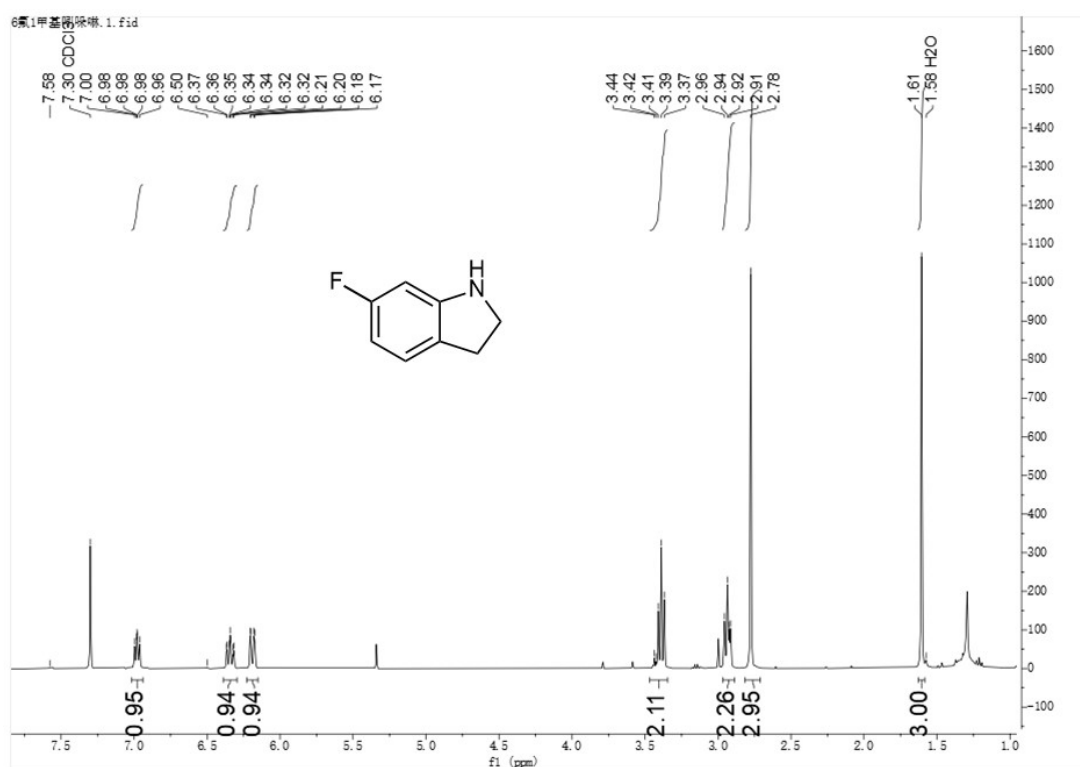

(33)  $^1\text{H}$  NMR spectrum for 5-fluoro-1-methylindoline

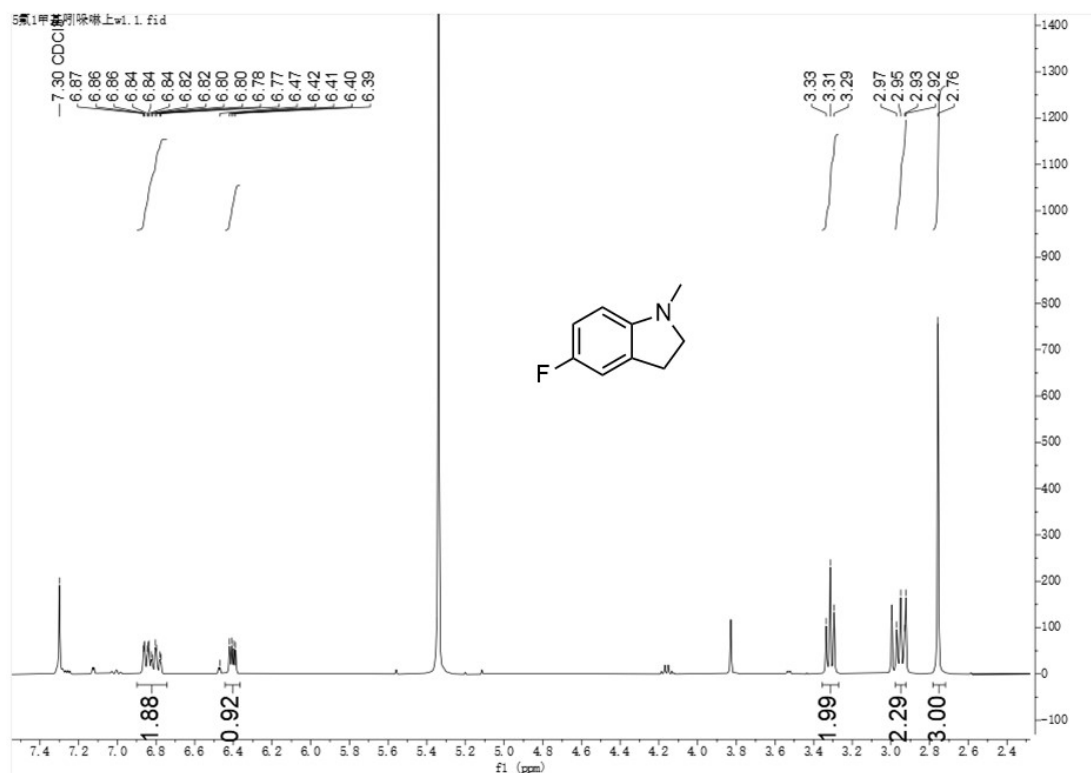



(34)  $^1\text{H}$  NMR spectrum for 4-fluoro-1-methylindoline

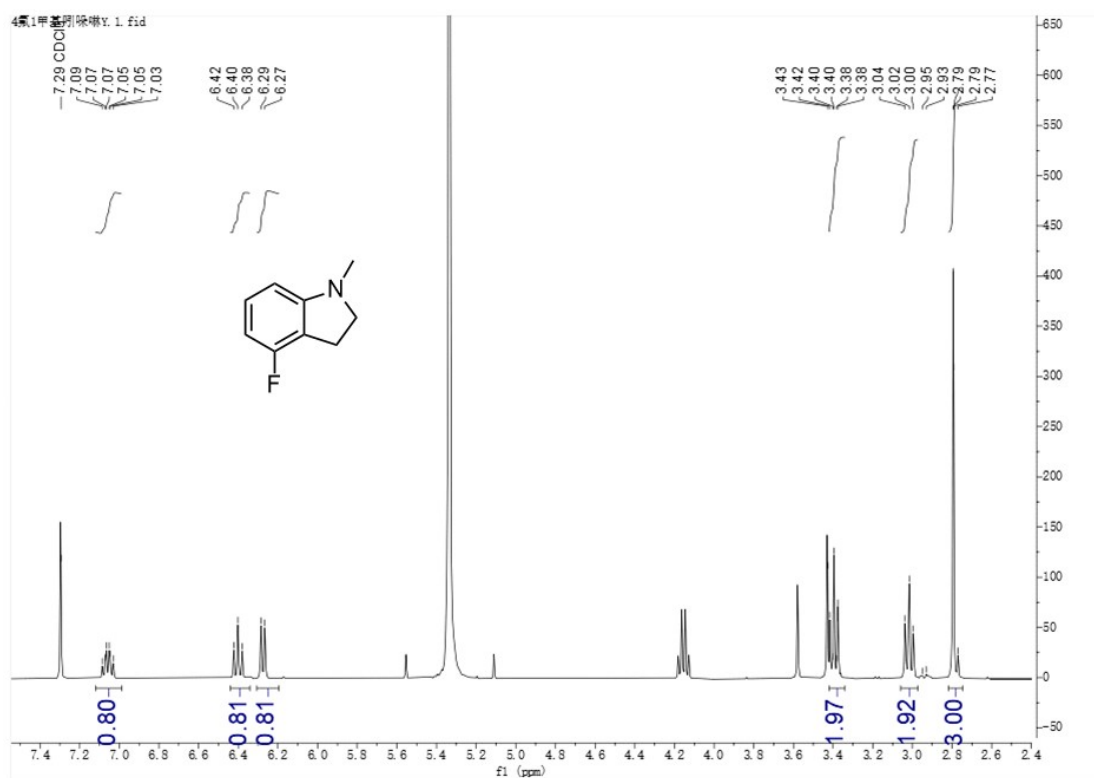

(35)  $^1\text{H}$  NMR spectrum for 6-chloro-1-methylindoline

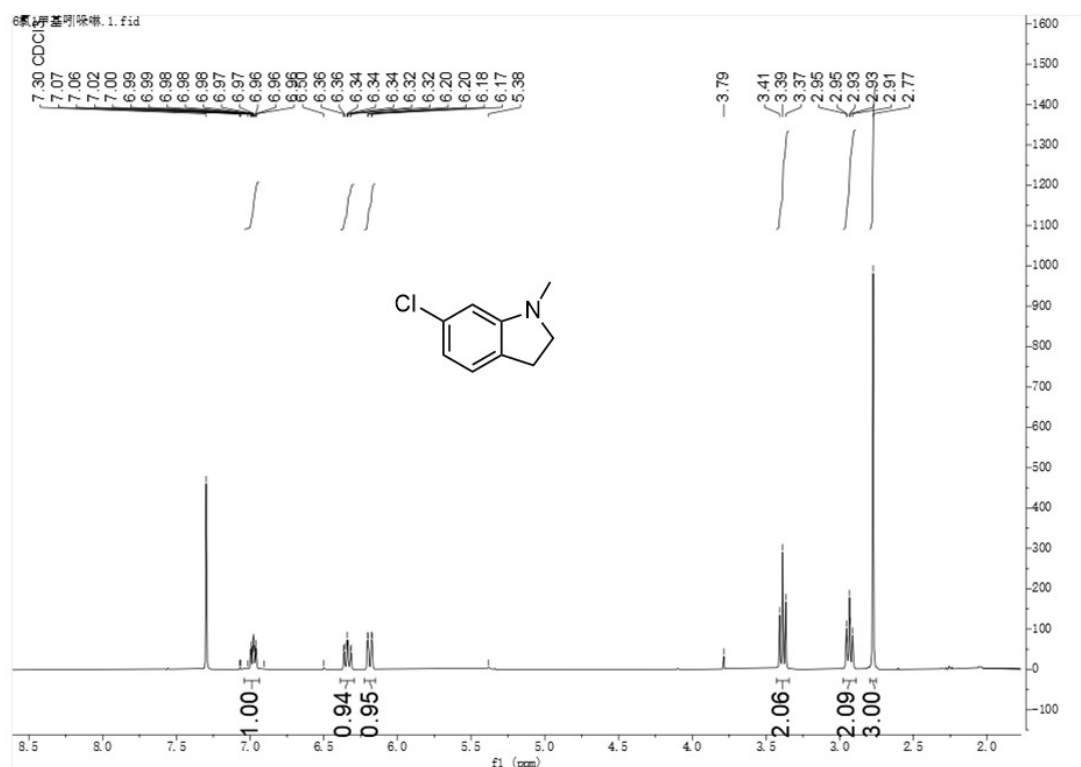

(36)  $^1\text{H}$  NMR spectrum for 4-chloro-1-methylindoline

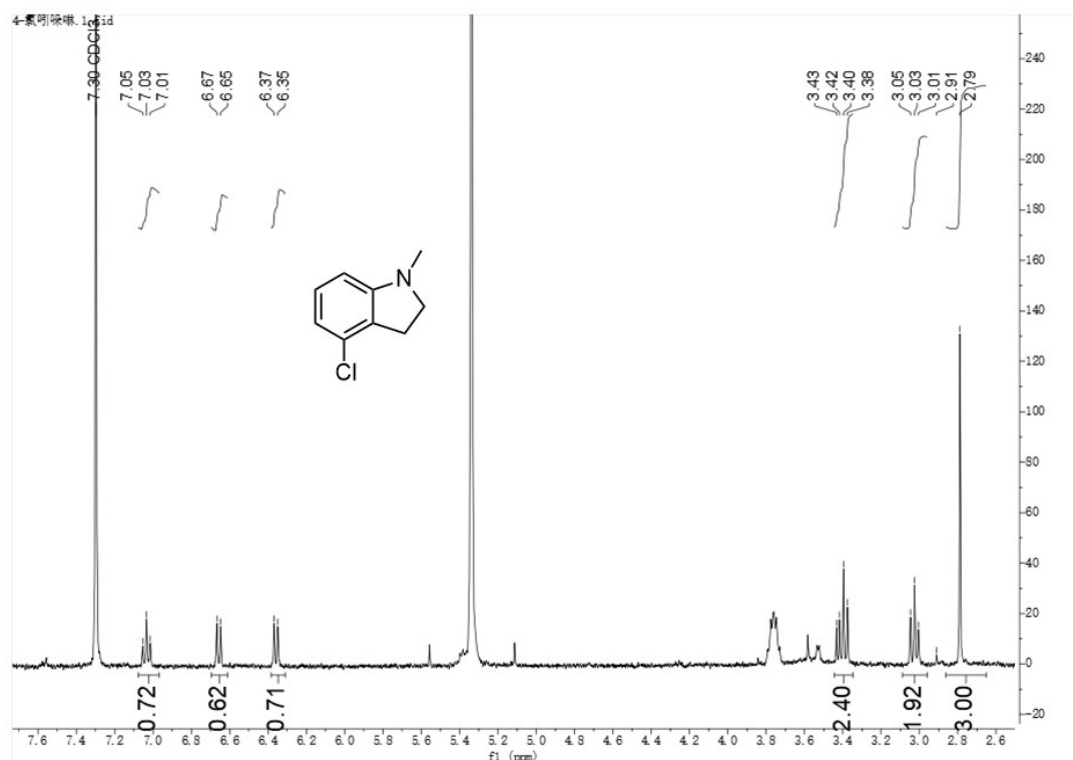

(37)  $^1\text{H}$  NMR and  $^{13}\text{C}$  NMR spectrum for N-methyl-1,2,3,4-tetrahydroquinoline

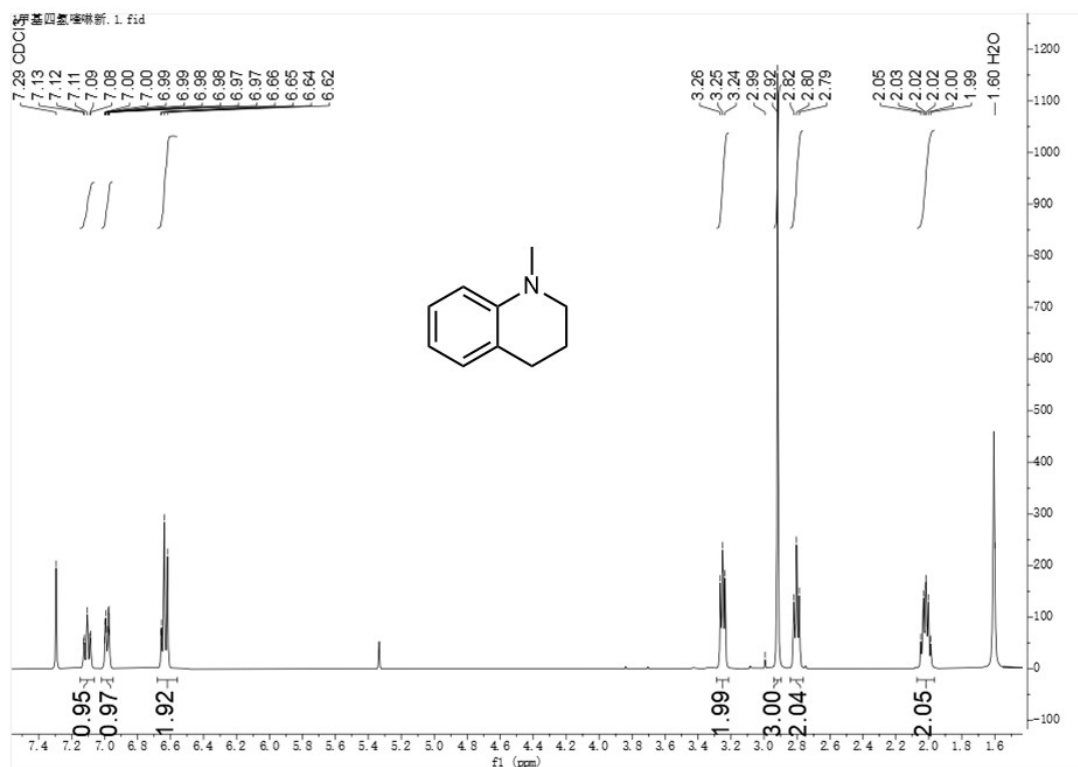

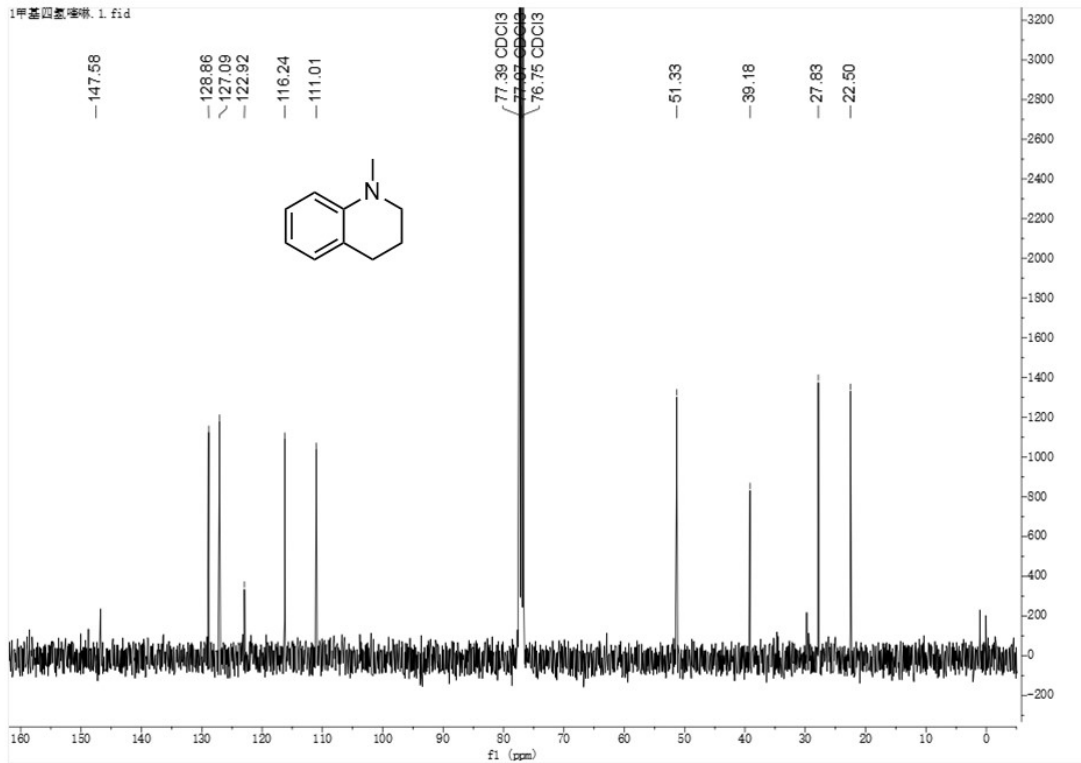

(38)  $^1\text{H}$  NMR spectrum for 1,8-dimethyl-1,2,3,4-tetrahydroquinoline

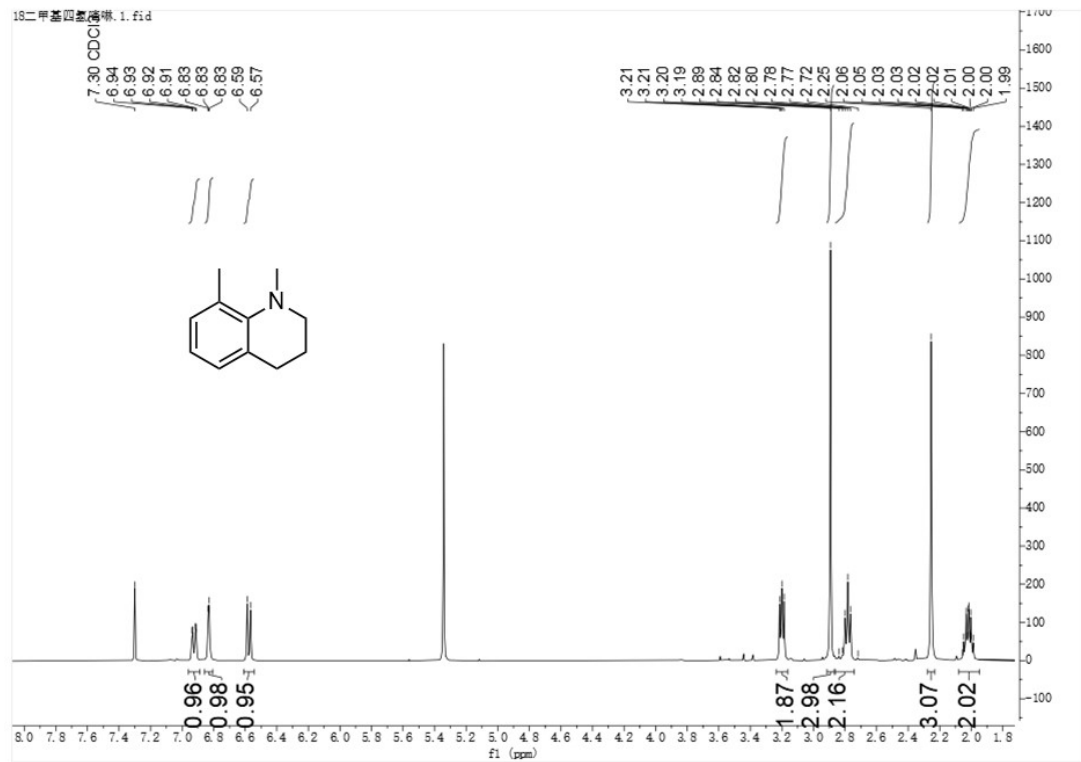

(39)  $^1\text{H}$  NMR and  $^{13}\text{C}$  NMR spectrum for 1,7-dimethyl-1,2,3,4-tetrahydroquinoline

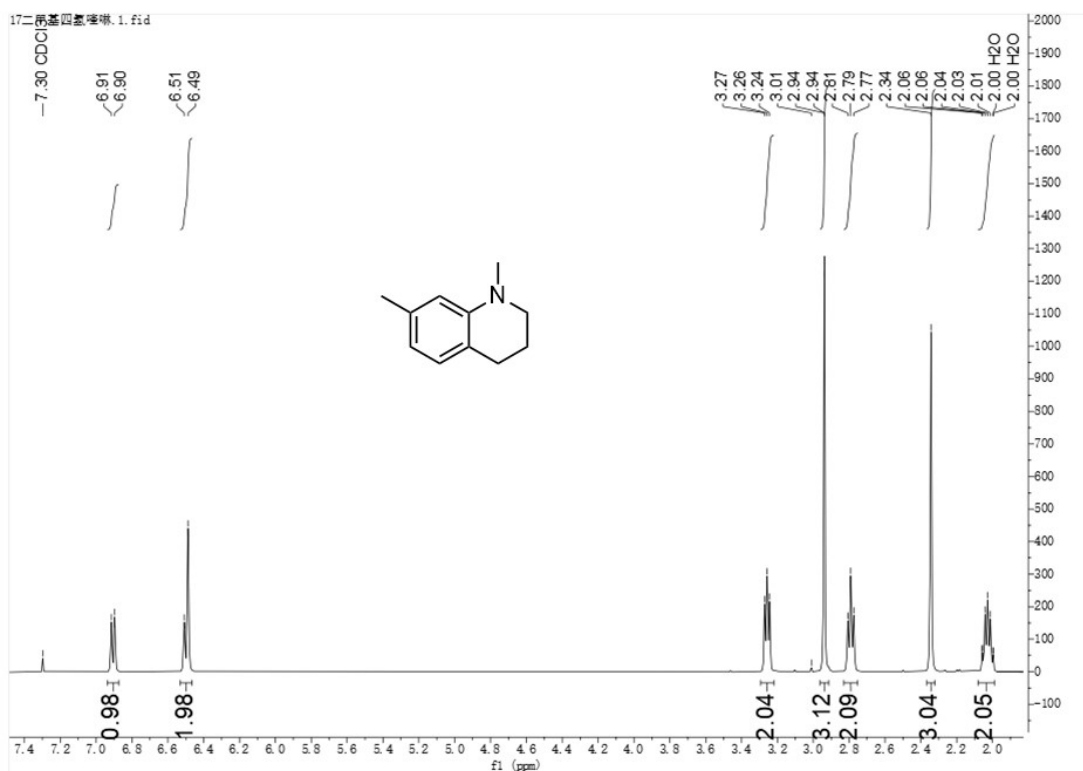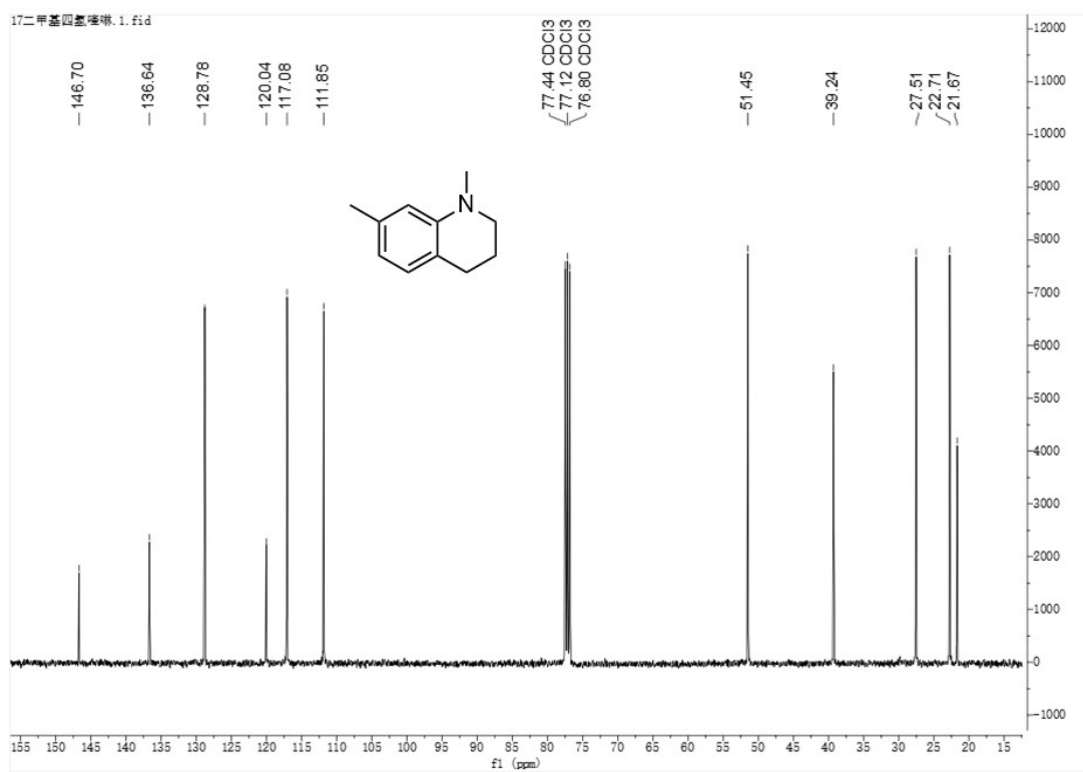

(40)  $^1\text{H}$  NMR and  $^{13}\text{C}$  NMR spectrum for 1,6-dimethyl-1,2,3,4-tetrahydroquinoline

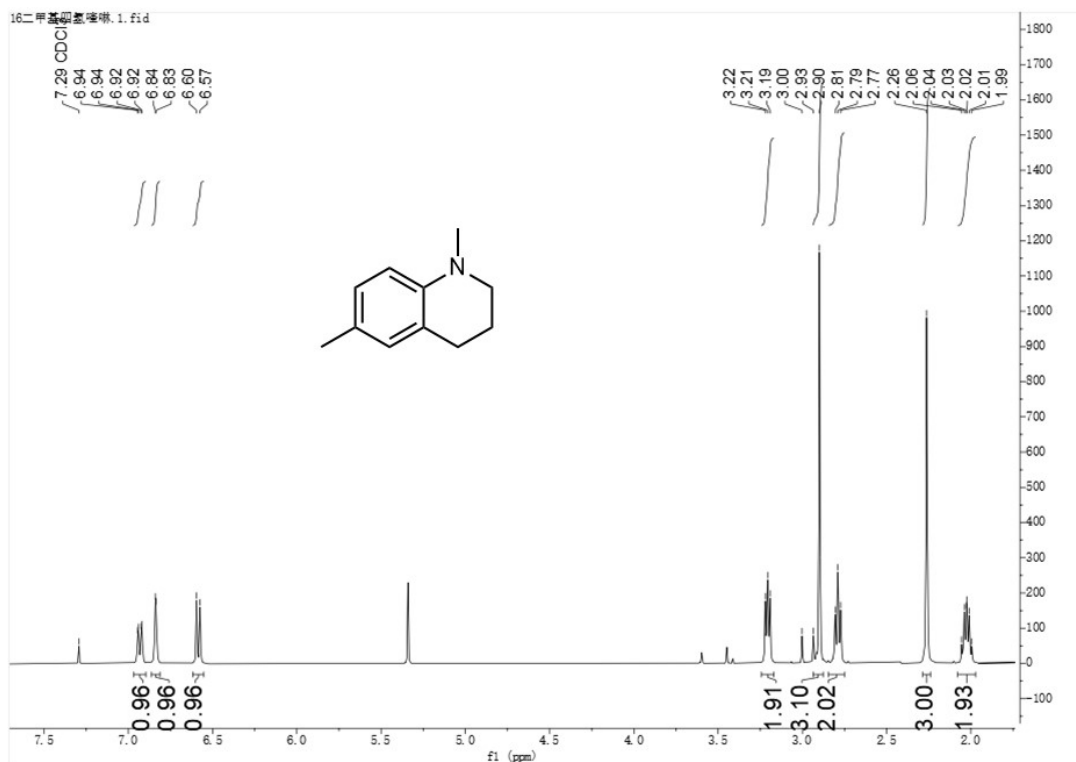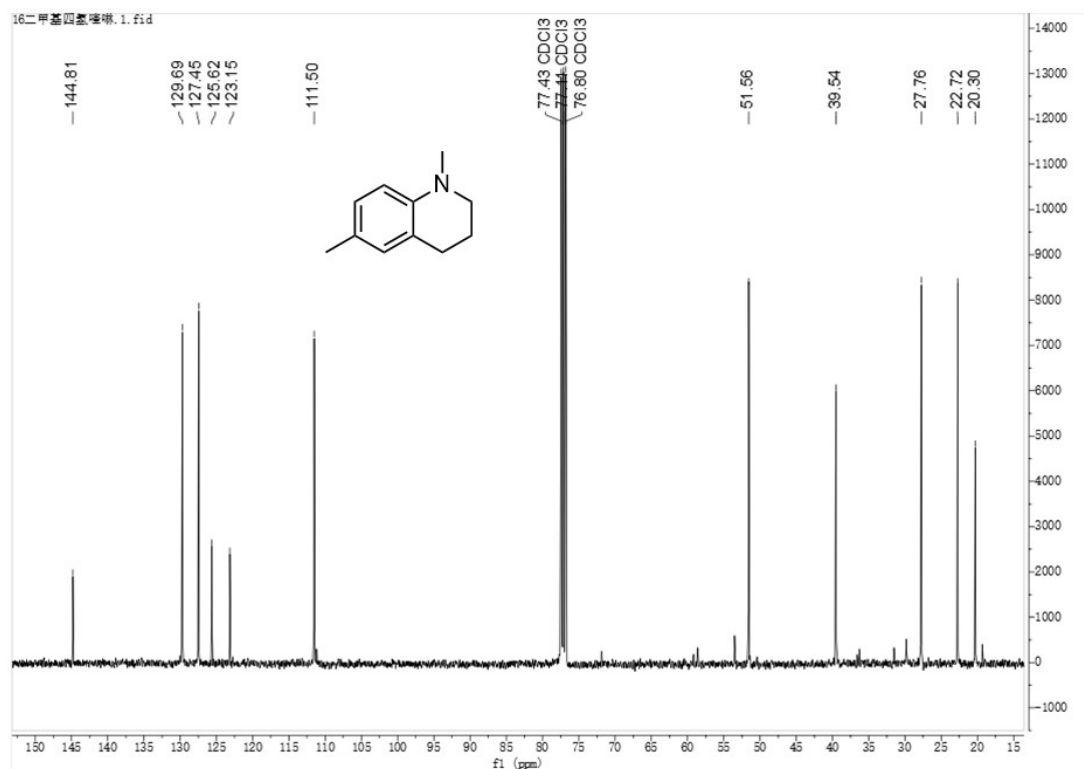

(41)  $^1\text{H}$  NMR spectrum for 1,5-dimethyl-1,2,3,4-tetrahydroquinoline

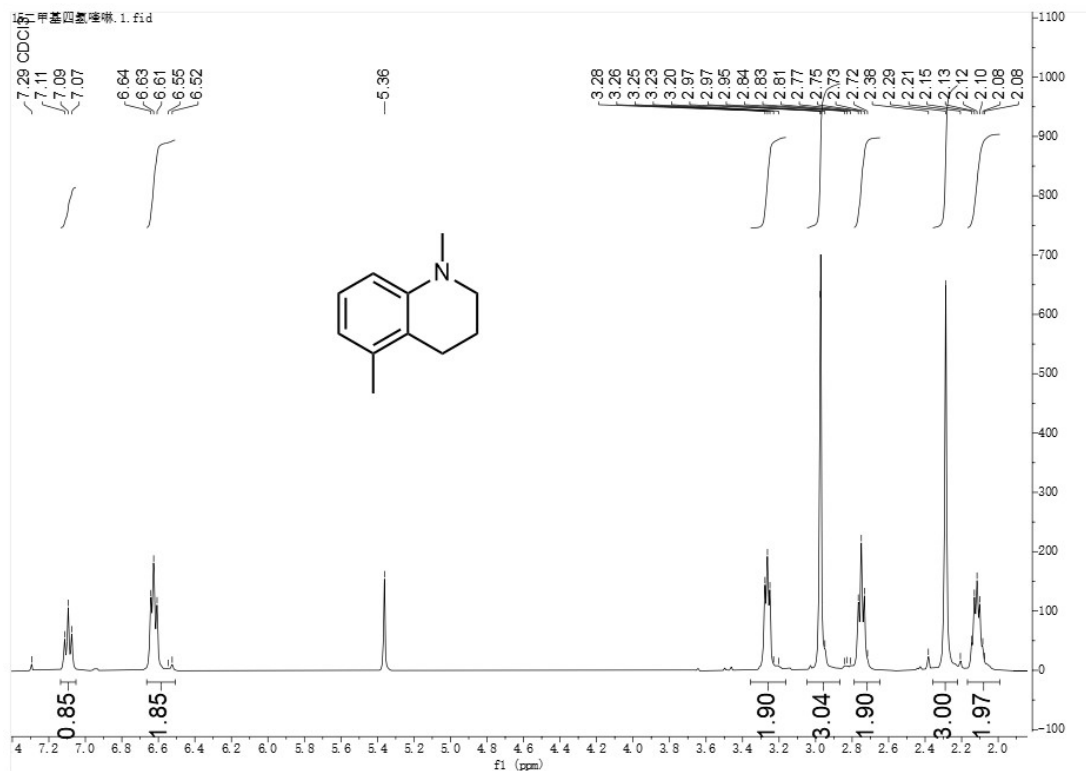

(42)  $^1\text{H}$  NMR and  $^{13}\text{C}$  NMR spectrum for 6-methoxy-1-methyl-1,2,3,4-tetrahydroquinoline

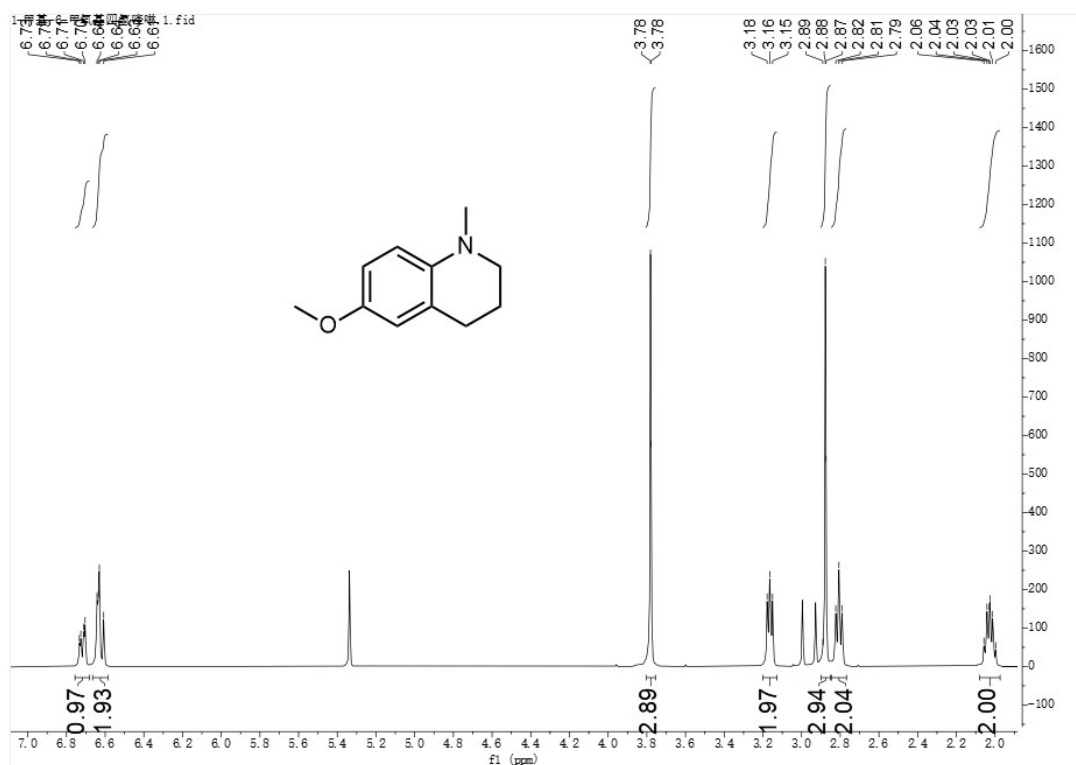

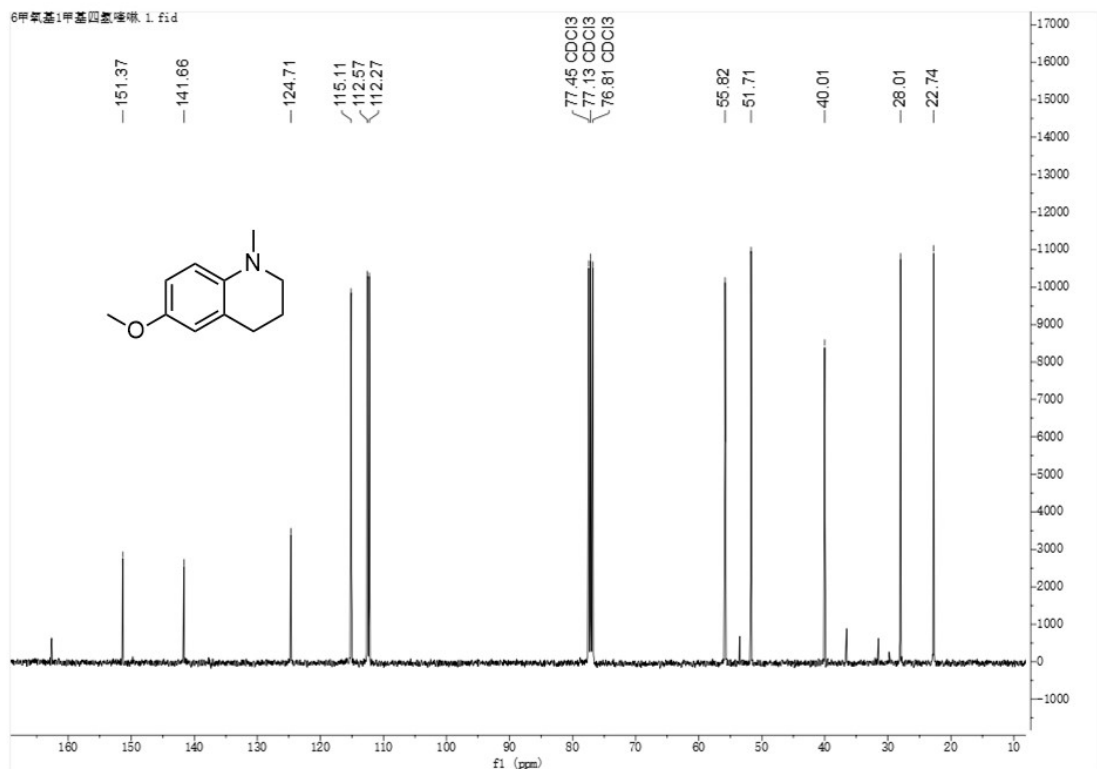

(43)  $^1\text{H}$  NMR and  $^{13}\text{C}$  NMR spectrum for 5-methoxy-1-methyl-1,2,3,4-tetrahydroquinoline

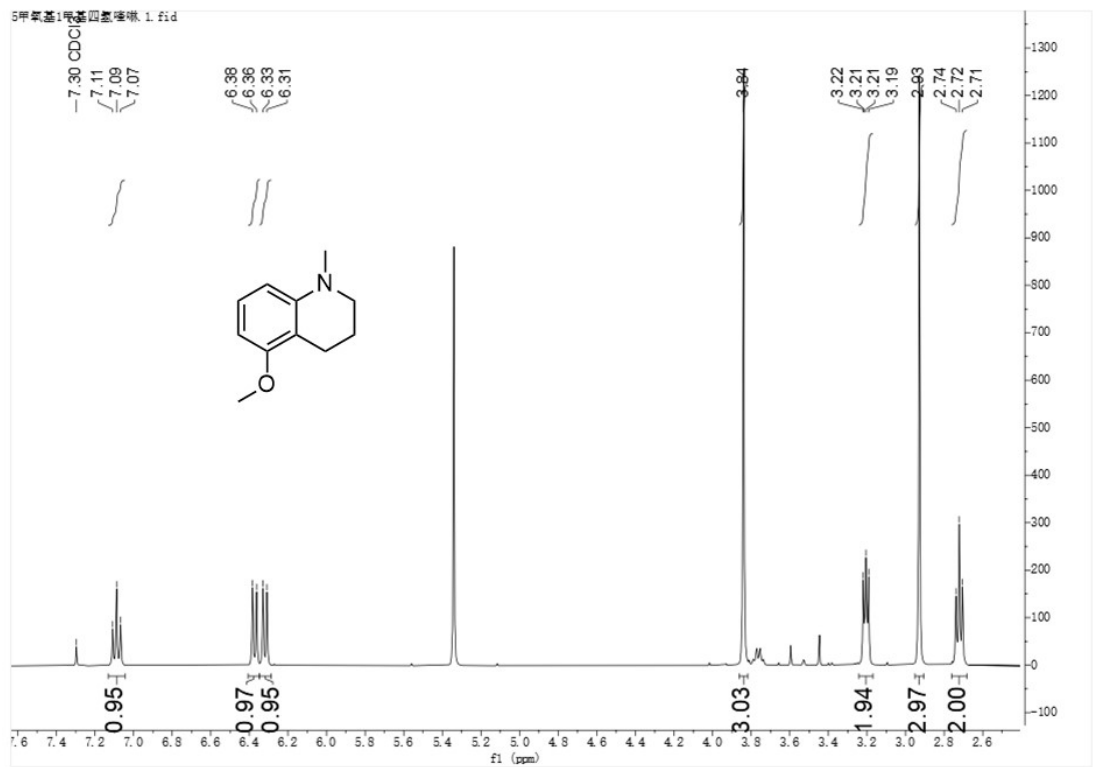

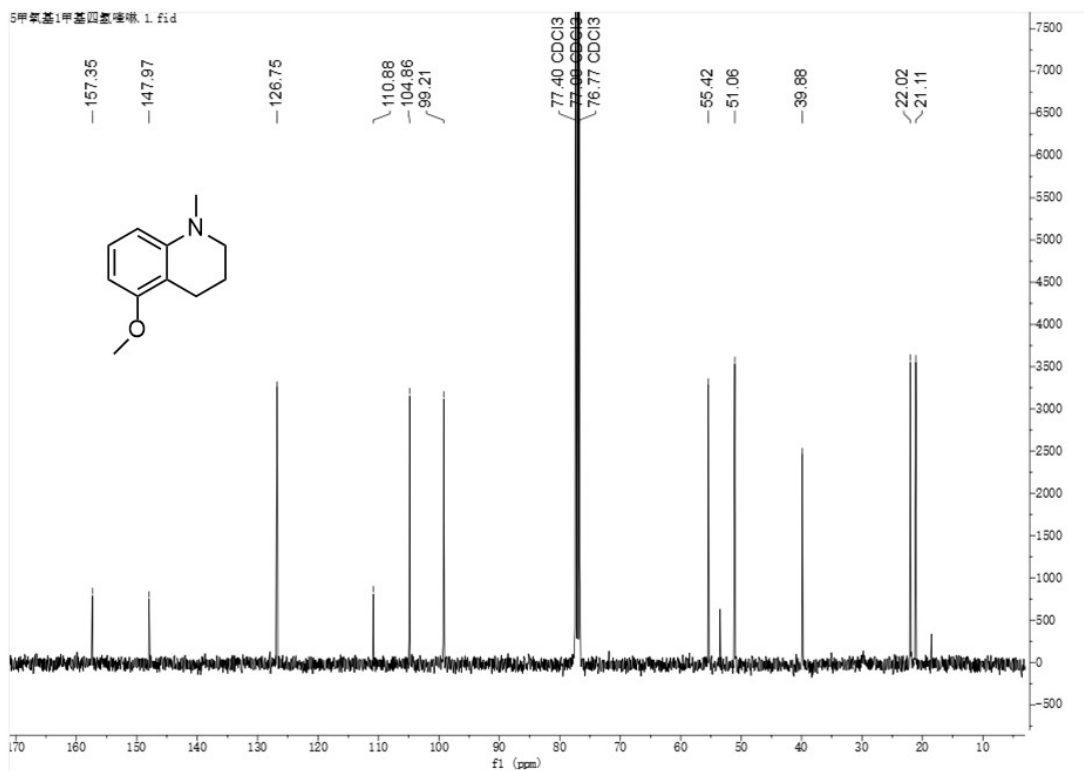

(44) <sup>1</sup>H NMR and <sup>13</sup>C NMR spectrum for 8-fluoro-1-methyl-1,2,3,4-tetrahydroquinoline

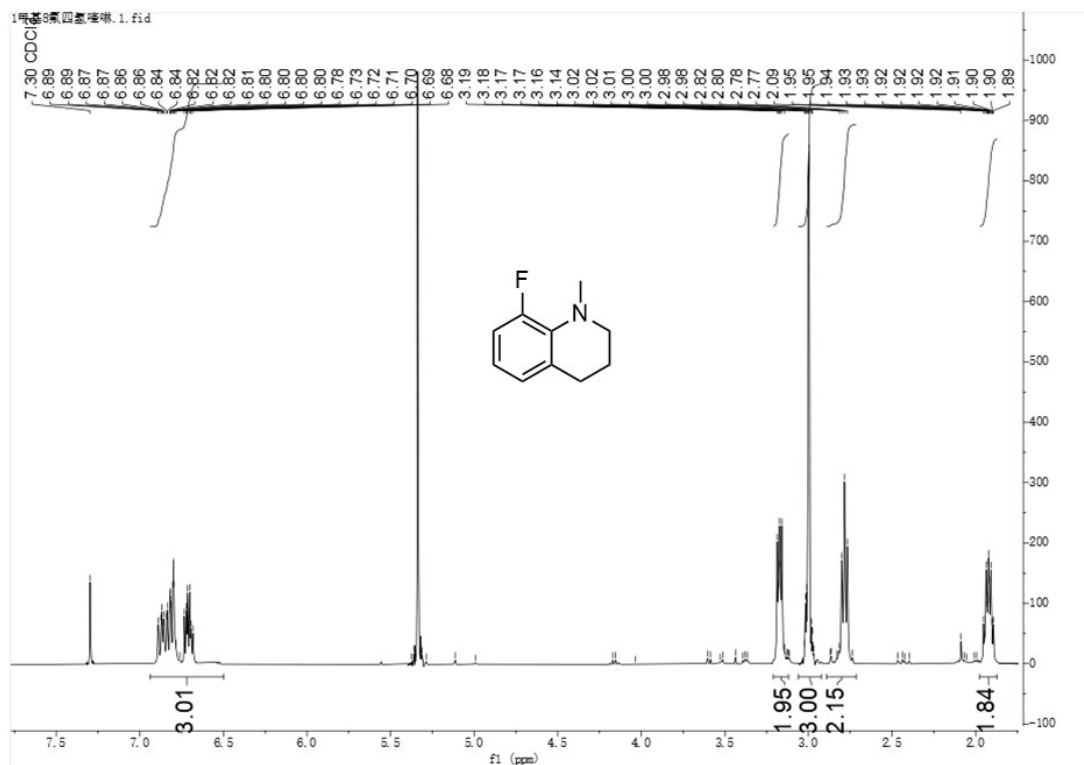



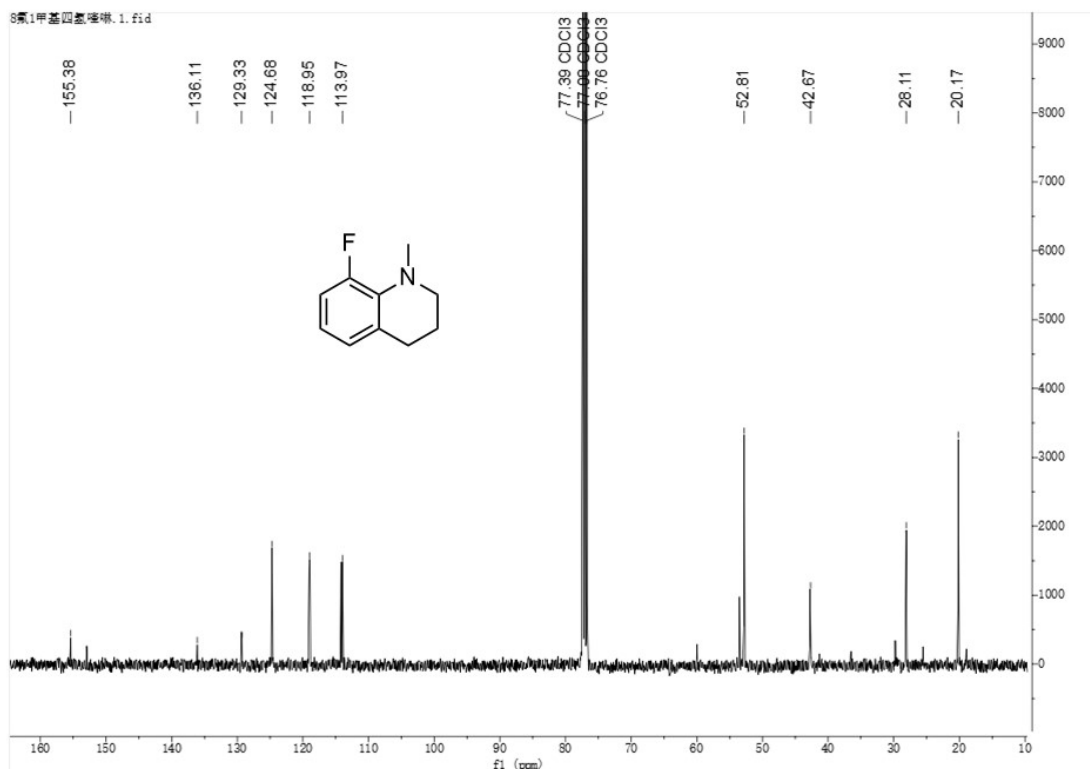

(45)  $^1\text{H}$  NMR and  $^{13}\text{C}$  NMR spectrum for 6-fluoro-1-methyl-1,2,3,4-tetrahydroquinoline

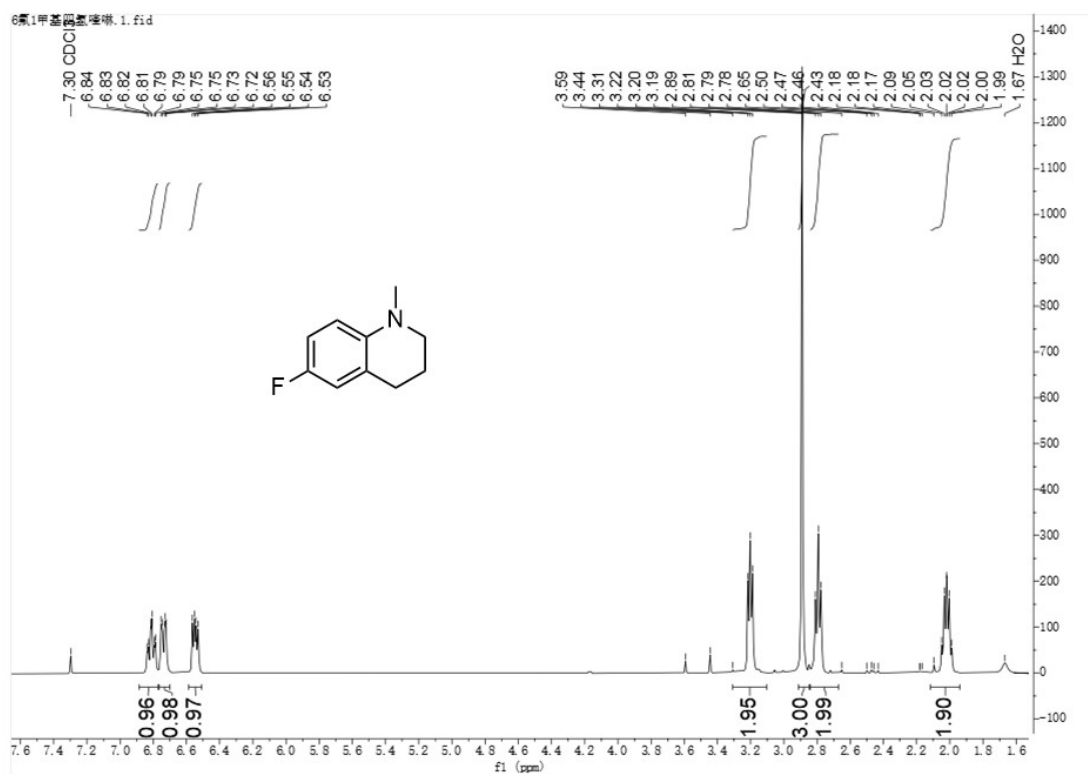

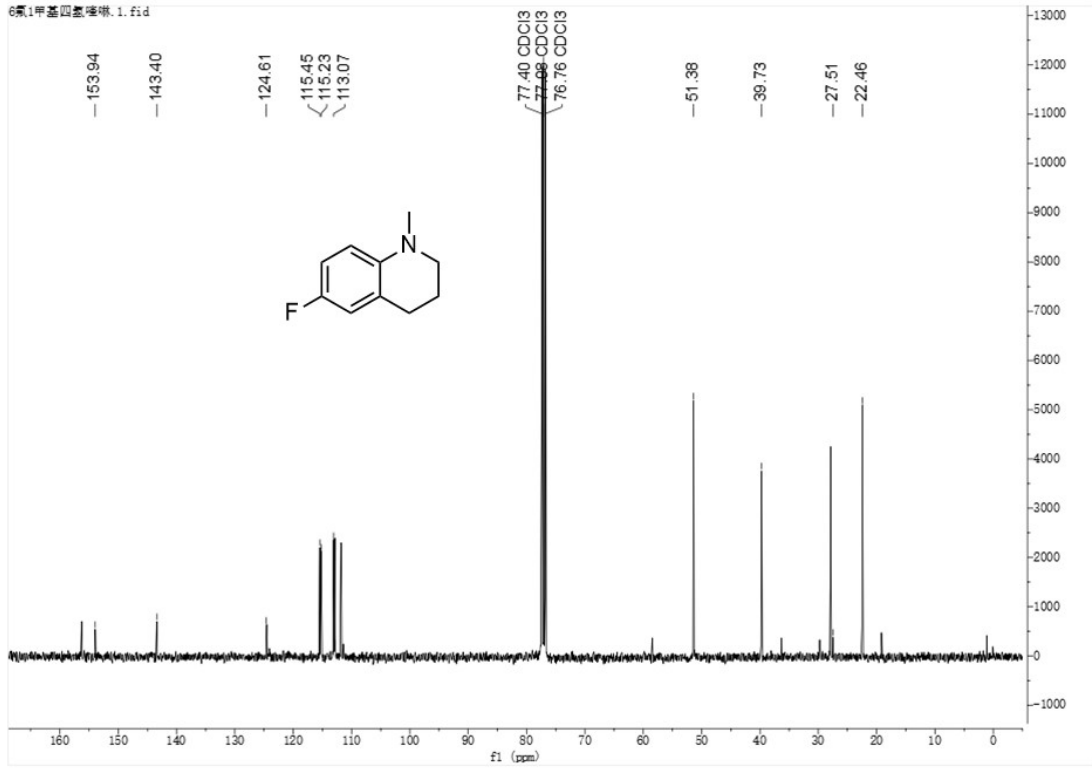

#### 4. References

1. Z. Wang, Z. Zhao, Y. Li, Y. Zhong, Q. Zhang, Q. Liu, G. A. Solan, Y. Ma and W.-H. Sun, *Chem. Sci.*, 2020, **11**, 6766-6774.
2. Y. Liu, Z. Wang, Z. Zhao, P. Gao, N. Ma and Q. Liu, *Mol. Catal.*, 2021, **516**, 111953.
3. C. Z. Zhou, Y. R. Zhao, F. F. Tan, Y. J. Guo, Y. Li, *ChemCatChem*, 2021, **22**, 4724-4728.
4. F.L. Zeng, H. Alper, *Org. Lett.*, 2013, **15**, 2034-2037.
5. S. Kato, Y. Saga, M. Kojima, H. Fuse, S. Matsunaga, A. Fukatsu, M. Kondo, S. Masaoka, M. Kanai, *J. Am. Chem. Soc.*, 2017, **139**, 2204-2207.
6. Y. X. Han, S. T. Zhang, J. H. He, Y. T. Zhang, *J. Am. Chem. Soc.*, 2017, **139**, 7399-7407.
7. W. L. Jia, N. Westerveld, K. M. Wong, T. Morsch, M. Hakkennes, K. Naksomboon, M. Á. Fernández-Ibáñez, *Org. Lett.* 2019, **21**, 9339–9342.
8. H. L. Wang, Y. J. Huang, Q. Jiang, X. C. Dai, F. Shi, *Chem. Commun.*, 2019, **55**, 3915-3918.
